1 **On-target inhibition of *Cryptosporidium parvum* by nitazoxanide (NTZ) and**  
2 **paclitaxel (PTX) validated using a novel *MDR1*-transgenic host cell model and**  
3 **algorithms to quantify on/off-target rates**

4 Bo Yang<sup>†</sup>, Yueyang Yan<sup>†</sup>, Dongqiang Wang, Ying Zhang, Jigang Yin and Guan Zhu\*

5 State Key Laboratory for Zoonotic Diseases, Key Laboratory of Zoonosis Research of the  
6 Ministry of Education, the Institute of Zoonosis, and the College of Veterinary Medicine, Jilin  
7 University, Changchun, China

8 <sup>†</sup>These authors contributed equally to this work.

9 \*Correspondence: [cryptosporida@gmail.com](mailto:cryptosporida@gmail.com) (G.Z.)

10 **Emails:**

11 [yangbo2015hsy@163.com](mailto:yangbo2015hsy@163.com) (B.Y.)

12 [yanyueyang@126.com](mailto:yanyueyang@126.com) (Y.Y.)

13 [wangdq909@163.com](mailto:wangdq909@163.com) (D.W.)

14 [zy15754305644@163.com](mailto:zy15754305644@163.com) (Y.Z.)

15 [yinlg@jlu.edu.cn](mailto:yinlg@jlu.edu.cn) (J.Y.)

16 [cryptosporida@gmail.com](mailto:cryptosporida@gmail.com) (G.Z.)

17

18 Short title:

19 **Validation and quantitation of on/off-target effect of anti-cryptosporidial**  
20 **inhibitors**

21

## 22 Abstract

23 *Cryptosporidium parvum* is a globally distributed zoonotic protozoan parasite that causes  
24 moderate to severe, sometime deadly, watery diarrhea in humans and animals, for which fully  
25 effective treatments are yet unavailable. In the study of mechanism of action of drugs against  
26 intracellular pathogens, it is important to validate whether the observed anti-infective activity is  
27 attributed to the drug action on the pathogen (on-target effect) or host cells (off-target effect). For  
28 the epicellular *Cryptosporidium*, we have previously developed a concept that the host cells with  
29 significantly increased drug tolerance by transient overexpression of the multidrug resistance  
30 protein-1 (MDR1) could be utilized to evaluate whether an observed anti-cryptosporidial activity  
31 of an inhibitor was attributed to the action of the inhibitor on the parasite or host cell targets.  
32 However, the transient transfection model was only applicable to evaluating inhibitors that were  
33 MDR1 substrates. Here we report an advanced model using stable MDR1-transgenic HCT-8  
34 cells that allowed continuous application of drug pressure for rapid development of novel  
35 resistance to non-MDR1 substrates. Using the new model, we successfully validated that  
36 nitazoxanide, the only FDA-approved drug to treat human cryptosporidiosis and non-MDR1  
37 substrate, killed *C. parvum* by fully acting on the parasite target (100% on-target). We also  
38 confirmed that paclitaxel acted fully on-target, while several other inhibitors including  
39 mitoxantrone, doxorubicin, vincristine and ivermectin acted partially on-target. Additionally, we  
40 developed mathematical models to quantify the proportional contributions of on-target and  
41 off-target effects to the observed anti-cryptosporidial activity and to evaluate the relationships  
42 between antiparasitic efficacy ( $EC_i$ ), cytotoxicity ( $TC_i$ ), safety interval ( $SI$ ) and Hill slope ( $h$ )  
43 parameters. Owing to the promiscuity of the MDR1 efflux pump, the *MDR1*-transgenic host  
44 cell model could be applied to assess the on/off-target effects of newly hits/leads, either  
45 substrates or non-substrates of MDR1, against *Cryptosporidium* or other epicellular pathogens.

46

## 47 **Author Summary**

48 *Cryptosporidium parvum* is an important zoonotic parasite, for which fully effective treatments  
49 are unavailable. Anti-cryptosporidial drug discovery faces many challenges and technical  
50 difficulties. One obstacle is the lack of tools to assess whether the killing of *C. parvum* by an  
51 inhibitor is attributed to the action of the inhibitor on the parasite or on host cells. To address this  
52 question, we developed an *MDR1*-transgenic host cell line that allowed rapid development of  
53 drug resistance by applying continuous drug pressure. By analyzing the antiparasitic activity and  
54 cytotoxicity between wild-type and drug-resistant host cells, we verified that nitazoxanide (the  
55 only FDA-approved drug for treating cryptosporidiosis) and paclitaxel (anti-cryptosporidial lead)  
56 killed the parasite by acting fully on the parasite, whereas mitoxantrone, doxorubicin, vincristine  
57 and ivermectin killed the parasite by acting on both the parasite and host cells. We also  
58 developed algorithms to quantify the percent contributions of actions on the parasite and host  
59 cells to the observed anti-cryptosporidial activity. In summary, we developed novel in vitro and  
60 mathematical models for evaluating/quantifying the on/off-target effects of anti-cryptosporidial  
61 drugs. The models are also applicable to evaluate/quantify the drug actions on other epicellular  
62 pathogens.

63

## 64 Introduction

65 Cryptosporidiosis is a globally distributed diarrheal disease of humans and animals. Among  
66 more than 40 *Cryptosporidium* species or genotypes, humans are mainly infected by *C. parvum*  
67 (zoonotic) and *C. hominis* (anthroponotic), while immunocompromised patients might also be  
68 infected by other species [1-3]. In people with weak or compromised immunity (e.g., infants,  
69 elderly and AIDS patients), cryptosporidial infection can be severe or deadly. Cryptosporidiosis  
70 is also a significant problem in farm animals and may cause death in neonatal calves and big  
71 weight loss in cattle [4,5]. On the other hand, only a single drug (i.e., nitazoxanide [NTZ]) is  
72 approved by the United States Food and Drug Administration (FDA) for treating human  
73 cryptosporidiosis. However, NTZ is not fully effective in immunocompetent patients and  
74 ineffective in immunocompromised individuals, and its mechanism of action remains undefined  
75 [6,7].

76 While the anti-cryptosporidial drug discovery has been impeded by some technical constraints  
77 (e.g., difficulties in manipulating the parasite in vitro and in vivo) and unique parasite biology  
78 (e.g., lack of conventional drug targets and epicellular parasitic lifestyle), an increasing effort in  
79 the past decade has resulted in the discovery of a number of leads showing excellent  
80 anti-cryptosporidial efficacy in vitro and in animal models [8-13]. Hits or leads might be  
81 identified by in vitro phenotypic screening or by target-based screening, followed by  
82 confirmation of efficacy in vitro and in vivo. For obligate intracellular parasites including  
83 *Cryptosporidium*, an efficacious drug may kill the parasite directly via acting on parasite target  
84 or indirectly via acting on host cell target, or both (i.e., actions on both the parasite and host  
85 targets contributing to the killing of the parasite) (see illustration in S1 Fig). For simplicity,  
86 hereinafter we will use “on-target” effect to describe the action of an inhibitor that is “on the  
87 parasite target” and “off-target” effect to describe the action of an inhibitor that is “off the  
88 parasite target” via acting on the host cell target.

89 The validation and quantification on whether and how much a hit/lead truly inhibits the parasite  
90 by acting on the parasite target is technically challenging for *Cryptosporidium* and other obligate  
91 intracellular pathogens. There were actually few attempts to demonstrate on-target effect of  
92 anti-cryptosporidial leads, mainly by analyzing coefficients between the inhibitory activities of

93 hits/lead analogs on a defined target ( $K_i$  or  $IC_{50}$  values) and their in vitro anti-cryptosporidial  
94 efficacies ( $EC_{50}$  values), e.g., the actions of inhibitors of phosphatidylinositol-4-OH kinase  
95 [PI(4)K] and methionyl tRNA-synthetase (MetRS) [10,14]. Among the anti-cryptosporidial leads  
96 discovered in the past decades, there is a general lack of experimental evidence to differentiate  
97 the contributions of actions on the parasite from those on the host cells to the observed efficacy.  
98 Even for NTZ and paromomycin, the two classic anti-cryptosporidial compounds and standards,  
99 the mechanisms of action of NTZ and paromomycin against *Cryptosporidium* parasites still  
100 remain speculative and undefined.

101 We have recently developed an HCT-8 cell-based transient *MDR1*-transfection model for  
102 evaluating the routes of drug actions on *C. parvum* [15]. The model takes advantage of the  
103 relatively broad-spectrum substrates of the multidrug resistance-1 transporter (MDR1), allowing  
104 rapid development of drug resistance in host cells on selected anti-cryptosporidial compounds.  
105 Because *C. parvum* is an epicellular parasite that is consistently exposed to the drug present in  
106 the culture medium (Fig 1C), the on/off-target effects can be evaluated by determining whether  
107 the MDR1-mediated increase of drug resistance in the host cells affects the anti-cryptosporidial  
108 efficacy of the drug. If a drug inhibits the parasite growth by solely acting on the parasite (100%  
109 on-target), the change of drug tolerance in the host cells would not affect the anti-cryptosporidial  
110 efficacy of the drug. Using this model, we have confirmed that the previously discovered lead  
111 paclitaxel (PTX) inhibits the growth of *C. parvum* solely by its action on the parasite (i.e.,  
112 on-target effect fully contributed to the killing of the parasite), while several other compounds  
113 act on both the parasite and host cell targets (i.e., both on- and off-target effects contributed to  
114 the killing of the parasite).

115 The transient *MDR1*-transfection model can be quickly established with increased tolerance to  
116 multiple drugs. However, the application of the transient transfection model is limited to the  
117 intrinsic substrates of MDR1 (e.g., paclitaxel), but inapplicable to non-substrates of MDR1 (e.g.,  
118 NTZ) [15]. Here we report the development of a new model with the potential to evaluate  
119 anti-cryptosporidial on/off-target effects of unrestricted classes of compounds. Based on the  
120 ligand promiscuity of MDR1 [16,17], we hypothesize that cells overexpressing MDR1 would be  
121 more adaptable to developing resistance to xenobiotics. Therefore, drug resistance would be  
122 more rapidly developed to both substrates and non-substrates of MDR1 in transgenic host cells

123 that stably overexpress *MDR1* and receive continuous drug pressure. To test this hypothesis, we  
124 established a transgenic HCT-8 cell line stably transfected with *MDR1*, applied drug pressures to  
125 the transgenic cells with an MDR1 substrate paclitaxel (PTX) and a non-MDR1 substrate  
126 nitazoxanide (NTZ), and successfully obtained two cell lines with significant increase of  
127 resistance to PTX (>3-fold increase over negative control) and to NTZ (>2-fold increase) in three  
128 months. The PTX-resistant cells also displayed increased resistance to a number of other  
129 compounds, including ivermectin (IVM), vincristine (VCT), doxorubicin (DRB) and  
130 mitoxantrone (MXT).

131 Using these cell lines, we validated that PTX and NTZ inhibited the growth of *C. parvum* in vitro  
132 by fully acting on the parasite target (i.e., 100% on-target), while the inhibitions by IVM, VCT,  
133 DRB and MXT were attributed to their actions on both the parasite and host cell targets (i.e.,  
134 partially on-target). This is for the first time that the on-target effect was confirmed for the only  
135 FDA-approved anti-cryptosporidial drug NTZ. Additionally, we developed algorithms to  
136 quantify the theoretical proportions of contribution of on-target and off-target effects of  
137 compounds to the observed anti-cryptosporidial activity in vitro.

## 138 **Results**

### 139 **Transgenic HCT-8 cells overexpressing *MDR1* allows relatively rapid development of drug** 140 **resistance to both substrates and non-substrates of MDR1**

141 We first generated a stable transgenic cell line by transfection of HCT-8 cells with a lentiviral  
142 vector carrying a copepod *GFP* (*copGFP*) and human *MDR1* genes driven by EF1 $\alpha$  and CMV  
143 promoter, respectively (Fig 2A). Parental HCT-8 cells (wild-type) and those carrying blank  
144 vectors (negative control) or *MDR1* gene were designated as HCT-8/WT, HCT-8/NC or  
145 HCT-8/MDR1 cells, or WT, NC or MDR cells for simplicity (Table 1). MDR1 cells  
146 continuously overexpressed MDR1 as demonstrated at both protein and mRNA levels (Fig 2B–  
147 2D). In comparison to NC cells, there were >1.5-fold increase of MDR1 protein and >9-fold  
148 increases of mRNA in MDR1 cells, respectively (Fig 2C, 2D). The fold increases were lower,  
149 but the levels were more consistent over the time, than those in our previously reported  
150 transiently transfected cells (i.e., 2.12- to 3.37-fold for protein and >40-fold for mRNA) [15].

151 **Table 1.** List of cell lines used in this study

| Cell lines      | Abbreviations | Drug selection     | Description                                                                                |
|-----------------|---------------|--------------------|--------------------------------------------------------------------------------------------|
| HCT-8/WT        | WT            | None               | Parental HCT-8 cells                                                                       |
| HCT-8/NC        | NC            | None               | Transgenic HCT-8 cells with blank vector (containing <i>copGFP</i> gene; negative control) |
| HCT-8/MDR1      | MDR1          | None               | Transgenic HCT-8 cells over-expressing <i>MDR1</i> and <i>copGFP</i> genes                 |
| HCT-8/WT(PTX)   | WT(PTX)       | Paclitaxel (PTX)   | HCT-8/WT cells after drug selection pressure by paclitaxel (PTX)                           |
| HCT-8/NC(PTX)   | NC(PTX)       | Paclitaxel (PTX)   | HCT-8/NC cells after drug selection pressure by paclitaxel (PTX)                           |
| HCT-8/MDR1(PTX) | MDR1(PTX)     | Paclitaxel (PTX)   | HCT-8/MDR1 cells after drug selection pressure by paclitaxel (PTX)                         |
| HCT-8/WT(NTZ)   | WT(NTZ)       | Nitazoxanide (NTZ) | HCT-8/WT cells after drug selection pressure by nitazoxanide (NTZ)                         |
| HCT-8/NC(NTZ)   | NC(NTZ)       | Nitazoxanide (NTZ) | HCT-8/NC cells after drug selection pressure by nitazoxanide (NTZ)                         |
| HCT-8/MDR1(NTZ) | MDR1(NTZ)     | Nitazoxanide (NTZ) | HCT-8/MDR1 cells after drug selection pressure nitazoxanide (NTZ)                          |

152  
153 The transgenic cell lines were evaluated for their drug tolerance to nine compounds by  
154 3-(4,5-dimethylthiazol-2-yl)-5-(3-carboxymethoxyphenyl)-2-(4-sulfophenyl)-2H-tetrazolium  
155 (MTS) cytotoxicity assay, including the anti-cryptosporidial lead PTX and the only licensed drug  
156 NTZ (see [S1 Table](#) for the description of compounds tested in this study). Based on the 50%  
157 cytotoxic concentrations ( $TC_{50}$ ), MDR1 cells showed 1.63-fold increase of tolerance to PTX  
158 ( $TC_{50} = 20.22 \mu\text{M}$ ; vs. 12.37 in NC or 12.75  $\mu\text{M}$  in WT cells) ([Fig 3A](#) ; [Table 2, left four](#)  
159 [columns](#)), but no change of tolerance to NTZ (i.e.,  $TC_{50} = 25.28, 25.90$  and  $26.75 \mu\text{M}$  on the  
160 three cell lines) ([Table 2](#); [Fig 3B](#)). The results agreed with the fact that PTX was a native  
161 substrate of MDR1, whereas NTZ was not [[17-19](#)]. The 1.63-fold increase of tolerance to PTX in  
162 the MDR1 cells was lower than the >2-fold increase in transiently transfected cells as previously  
163 reported [[15](#)]. MDR1 cells (vs. NC or WT cells) also exhibited increased tolerance to four of the  
164 other seven compounds, i.e., 1.54- to 1.76-fold increases to mitoxantrone (MTX), doxorubicin  
165 (DXR), vincristine (VCT) and ivermectin (IVM), but not to cyclosporin A (CSA), daunorubicin  
166 (DRC) and loperamide (LPM) (i.e., 0.95- to 1.03-fold changes) ([Table 2](#)).

167 **Table 2.** Drug tolerance profiles of the three host cell lines before and after selection by paclitaxel (PTX) as determined by MTS assay and  
 168 expressed in 50% inhibition concentrations ( $TC_{50}$  values)

| Compounds                       | $TC_{50}$ in cells without drug selection ( $\mu$ M) and fold changes (vs NC) |       |       |          | $TC_{50}$ in cells with selection by PTX ( $\mu$ M) and fold changes (vs NC(PTX)) |         |           |                    | Fold changes of $TC_{50}$ after selection by PTX (vs their parent cell lines) |                |                    |                  |
|---------------------------------|-------------------------------------------------------------------------------|-------|-------|----------|-----------------------------------------------------------------------------------|---------|-----------|--------------------|-------------------------------------------------------------------------------|----------------|--------------------|------------------|
|                                 | WT                                                                            | NC    | MDR1  | MDR1/NC* | WT(PTX)                                                                           | NC(PTX) | MDR1(PTX) | MDR1(PTX)/NC(PTX)* | WT(PTX) vs. WT                                                                | NC(PTX) vs. NC | MDR1(PTX) vs. MDR1 | MDR1(PTX) vs. NC |
| Paclitaxel (PTX) <sup>†</sup>   | 12.75                                                                         | 12.37 | 20.22 | 1.63     | 16.03                                                                             | 15.20   | 45.86     | <b>3.02</b>        | 1.26                                                                          | 1.23           | <b>2.27</b>        | <b>3.71</b>      |
| Mitoxantrone (MXT) <sup>†</sup> | 4.31                                                                          | 4.11  | 6.79  | 1.65     | 4.23                                                                              | 4.34    | 11.21     | <b>2.58</b>        | 0.98                                                                          | 1.06           | 1.65               | <b>2.73</b>      |
| Doxorubicin (DXR) <sup>†</sup>  | 4.03                                                                          | 4.34  | 6.67  | 1.54     | 4.24                                                                              | 4.15    | 10.43     | <b>2.51</b>        | 1.05                                                                          | 0.96           | 1.56               | <b>2.40</b>      |
| Vincristine (VCT) <sup>†</sup>  | 6.72                                                                          | 7.15  | 12.61 | 1.76     | 6.96                                                                              | 7.29    | 21.51     | <b>2.95</b>        | 1.04                                                                          | 1.02           | 1.71               | <b>3.01</b>      |
| Ivermectin (IVM) <sup>†</sup>   | 15.52                                                                         | 15.29 | 24.02 | 1.57     | 14.51                                                                             | 14.64   | 36.37     | <b>2.48</b>        | 0.93                                                                          | 0.96           | 1.51               | <b>2.38</b>      |
| Cyclosporin A (CSA)             | 8.60                                                                          | 8.87  | 8.69  | 0.98     | 8.75                                                                              | 8.82    | 9.05      | 1.03               | 1.02                                                                          | 0.99           | 1.04               | 1.02             |
| Daunorubicin (DRC)              | 3.91                                                                          | 4.16  | 3.95  | 0.95     | 3.88                                                                              | 4.05    | 10.23     | <b>2.53</b>        | 0.99                                                                          | 0.97           | 2.59               | <b>2.46</b>      |
| Loperamide (LPM)                | 15.96                                                                         | 16.08 | 16.49 | 1.03     | 16.42                                                                             | 15.17   | 15.34     | 1.01               | 1.03                                                                          | 0.94           | 0.93               | 0.95             |
| Nitazoxanide (NTZ) <sup>†</sup> | 26.75                                                                         | 25.90 | 25.28 | 0.98     | 25.37                                                                             | 26.76   | 25.59     | 0.96               | 0.95                                                                          | 1.03           | 1.01               | 0.99             |

169 \* Numbers in these columns are ratios (fold changes) of  $TC_{50}$  values between specified cell lines on specified compounds. Bold fonts indicate those  
 170 showing >2-fold increases of  $TC_{50}$  values. <sup>†</sup>These compounds were selected for comparing their efficacies against the growth of *C. parvum* cultured  
 171 in MDR1(PTX) and NC cell lines for determining on/off-target effects.

172



173 To test the hypothesis that stable *MDR1*-transgenic cells were more adaptable to drug selection  
174 for developing drug resistance to the “substrates of MDR1”, we applied continuous drug  
175 pressures with stepwise increase of concentrations of PTX to MDR1 cells (vs. WT and NC cells)  
176 (see **S2 Table** for drug selection design). For clarity, a cell line after drug selection was named by  
177 adding abbreviation of the drug in parenthesis, e.g., WT(PTX), NC(PTX) or MDR1(PTX) (**Table**  
178 **1**). After selection with PTX, all three resulting cell lines [i.e., WT(PTX), NC(PTX) and  
179 MDR1(PTX)] increased tolerance to PTX. For comparison of cells before and after PTX  
180 selection, WT(PTX) and NC(PTX) cells showed smaller increases of PTX-resistance (i.e., 1.26-  
181 or 1.23-fold increase of  $TC_{50}$  vs. WT or NC cells) (**Fig 3C**; **Table 2**, **middle four columns**), while  
182 MDR1(PTX) cells showed a much larger increase of PTX-resistance (i.e., 2.27-fold increase vs.  
183 MDR1 cells) (**Table 2**, **right four columns**). These observations confirmed that cells  
184 overexpressing *MDR1* could develop drug resistance more rapidly under drug pressure than WT  
185 and NC cells. In comparison to the negative control cells [e.g., NC(PTX) and NC cells],  
186 MDR1(PTX) cells displayed much higher resistance to PTX (i.e., 3.02- and 3.71-fold increases,  
187 respectively). Cells after PTX selection also increased resistance to five other compounds,  
188 including MTX, DXR, VCT, IVM and DRC (2.48- to 2.95-fold vs NC(PTX); or 2.38- to  
189 3.01-fold vs NC cells), but not to CSA, LPM and NTZ (**Table 2**; **Fig 3D**). It was notable that the  
190 resistance to DRC was successfully increased in MDR1(PTX) cells (2.46-fold vs. NC cells) that  
191 was unachieved in MDR1 cells (0.95-fold vs. NC cells).

192 We also tested the hypothesis that drug resistance to “non-substrates of MDR1” could be rapidly  
193 developed in stable *MDR1*-transgenic cells. NTZ was chosen here because it was the only  
194 FDA-approved drug to treat human cryptosporidiosis, for which the mechanism of action still  
195 remained undefined. By applying continuous drug pressures of NTZ, all three resulting cell lines  
196 developed resistance to NTZ at varied levels (**Table 3**; **Fig 3E**, **3F**). There were 1.45-, 1.51- and  
197 2.06-fold increases of  $TC_{50}$  values in WT(NTZ), NC(NTZ) and MDR1(NTZ) cells over their  
198 parental WT, NC and MDR1 cells (**Table 3**, **right four columns**). NTZ-selection did not increase  
199 the drug tolerance of WT, NC and MDR1 cells to the other eight compounds (**Table 3**),  
200 indicating that the developed resistance was specific for NTZ, rather than to multiple drugs.

201

202 **Table 3.** Drug tolerance profiles of the three host cell lines before and after selection by nitazoxanide (NTZ) as determined by MTS assay and  
 203 expressed in 50% inhibition concentrations ( $TC_{50}$  values)

| Compounds                       | $TC_{50}$ in cells without drug selection ( $\mu\text{M}$ ) and ratios to NC |       |       |          | $TC_{50}$ in cells with selection by NTZ ( $\mu\text{M}$ ) and ratios to NC(NTZ) |         |           |                    | Fold increases of $TC_{50}$ after selection by NTZ (vs. their parent cell lines) |                |                    |                  |
|---------------------------------|------------------------------------------------------------------------------|-------|-------|----------|----------------------------------------------------------------------------------|---------|-----------|--------------------|----------------------------------------------------------------------------------|----------------|--------------------|------------------|
|                                 | WT                                                                           | NC*   | MDR1  | MDR1/NC* | WT(NTZ)                                                                          | NC(NTZ) | MDR1(NTZ) | MDR1(NTZ)/NC(NTZ)* | WT(NTZ) vs. WT                                                                   | NC(NTZ) vs. NC | MDR1(NTZ) vs. MDR1 | MDR1(NTZ) vs. NC |
| Nitazoxanide (NTZ) <sup>†</sup> | 26.75                                                                        | 25.90 | 25.28 | 0.98     | 38.70                                                                            | 39.09   | 52.19     | 1.34               | 1.45                                                                             | 1.51           | <b>2.06</b>        | <b>2.02</b>      |
| Paclitaxel (PTX)                | 12.75                                                                        | 12.37 | 20.22 | 1.63     | 12.51                                                                            | 12.73   | 21.94     | 1.72               | 0.98                                                                             | 1.03           | 1.09               | 1.77             |
| Mitoxantrone (MXT)              | 4.31                                                                         | 4.11  | 6.79  | 1.65     | 4.15                                                                             | 4.19    | 6.74      | 1.61               | 0.96                                                                             | 1.02           | 0.99               | 1.64             |
| Doxorubicin (DXR)               | 4.03                                                                         | 4.34  | 6.67  | 1.54     | 4.18                                                                             | 4.21    | 6.90      | 1.64               | 1.04                                                                             | 0.97           | 1.03               | 1.59             |
| Vincristine (VCT)               | 6.72                                                                         | 7.15  | 12.61 | 1.76     | 7.04                                                                             | 6.87    | 12.38     | 1.80               | 1.05                                                                             | 0.96           | 0.98               | 1.73             |
| Ivermectin (IVM)                | 15.52                                                                        | 15.29 | 24.02 | 1.57     | 14.75                                                                            | 15.18   | 22.59     | 1.49               | 0.95                                                                             | 0.99           | 0.94               | 1.48             |
| Cyclosporin A (CSA)             | 8.60                                                                         | 8.87  | 8.69  | 0.98     | 9.12                                                                             | 9.06    | 8.71      | 0.96               | 1.06                                                                             | 1.02           | 1.00               | 0.98             |
| Daunorubicin (DRC)              | 3.91                                                                         | 4.16  | 3.95  | 0.95     | 4.09                                                                             | 3.85    | 3.93      | 1.02               | 1.05                                                                             | 0.93           | 0.99               | 0.94             |
| Loperamide (LPM)                | 15.96                                                                        | 16.08 | 16.49 | 1.03     | 16.23                                                                            | 15.64   | 15.35     | 0.98               | 1.02                                                                             | 0.97           | 0.93               | 0.95             |

204 \* Numbers in these columns are ratios (fold changes) of  $TC_{50}$  values between specified cell lines on specified compounds. Bold fonts indicate those  
 205 showing >2-fold increases of  $TC_{50}$  values. <sup>†</sup> The compound was used in subsequent experiments to assess their efficacies against the growth of *C.*  
 206 *parvum* cultured in MDR1(NTZ) and NC cell lines for determining on/off-target effects.  
 207

208 Overexpression of *MDR1* and selection with PTX or NTZ caused no apparent changes on the  
209 morphology and growth of host cells in vitro (Fig 4). Selection with either PTX or NTZ had no  
210 significant effects on MDR1 protein levels as shown by immunofluorescence assay (IFA) (Fig  
211 4). Western blot analysis also showed that the ratios of MDR1 protein levels for the three pairs of  
212 cell lines [i.e., MDR1 vs. NC; MDR1(PTX) vs. NC(PTX) and MDR1(NTZ) vs. NC(NTZ)] were  
213 relatively consistent (Fig 2E). Only the mRNA levels showed a relatively higher increase by the  
214 PTX-selection [i.e., MDR1(PTX) vs. NC(PTX)] (Fig 2F).

215 In short summary, stable overexpression of *MDR1* in HTC-8 cells could increase tolerance of the  
216 cells to multiple MDR1 substrates (e.g., PTX), but at lower than 2-fold increase in general. The  
217 drug tolerance could be further increased by applying drug pressure. More importantly, stable  
218 overexpression of *MDR1* allowed the development of drug tolerance of host cells to non-MDR1  
219 substrates (e.g., NTZ) by applying drug pressure in a relatively short timeframe (e.g., in around  
220 three months to develop >2.0-fold increase of resistance to NTZ).

221 **PTX and NTZ inhibited the growth of *C. parvum* by acting fully on the parasite targets,**  
222 **while DXR, IVM, MXT and VCT acted on both the parasite and host targets**

223 The availability of host cells with >2 to 3-fold increase of drug resistance to NTZ, PTX and four  
224 other compounds made it possible to evaluate whether, and how much, the anti-cryptosporidial  
225 activities of these compounds were attributed to their actions on the parasite targets. In theory, if  
226 a specified inhibitor inhibited the epicellular *C. parvum* in vitro by solely acting on the parasite  
227 target and its action on host cell target made no contribution to the antiparasitic activity, the  
228 increase of resistance to the inhibitor in the host cells would not affect the anti-cryptosporidial  
229 activity [15]. This could be achieved by comparing the anti-cryptosporidial efficacy (EC<sub>50</sub>  
230 values) with cytotoxicity (TC<sub>50</sub> values) of the inhibitor between MDR1(PTX) and NC or  
231 between MDR1(NTZ) and NC cells.

232 As a quality control, we first confirmed that overexpression of *MDR1* and drug selection by  
233 either PTX or NTZ in the host cells had no effect on the infection and growth of *C. parvum* by a  
234 qRT-PCR-based 44-h infection assay, in which all nine cell lines showed virtually identical  
235 parasite loads (Fig 5A). There were no enrichment of MDR1 protein at the *C. parvum* infection  
236 sites in MDR1, MDR1(PTX) and MDR1(NTZ) cells (Fig 5B), indicating the overexpression of

237 MDR1 would not alter the drug fluxes at the host cell-parasite interface or on the  
238 parasitophorous vacuole membrane (PVM) to complicate the drug action on the parasite. All  
239 compounds displayed no difference in their anti-cryptosporidial activities between WT and NC  
240 cells, confirming that transfection of cells with vector alone had no effect on the action of  
241 compounds to the parasite (Fig 6; Table 4). We then used these host cell lines to evaluate the  
242 on/off-target effects of PTX, NTZ and four other compounds by examining whether increased  
243 drug tolerance in host cells affected anti-cryptosporidial activities.

244 Using MDR1(PTX) cells as an in vitro model (vs. WT and NC cells), PTX showed the same  
245 anti-cryptosporidial efficacy in all three cell lines based on the inhibitory curves and EC<sub>50</sub> values  
246 (Fig 6A; Table 4; S3 Table), indicating that the increase of drug tolerance in host cells had no  
247 effect on the killing of the parasite by PTX. This confirmed that PTX inhibited the parasite  
248 growth by solely acting on the parasite target (i.e., 100% on-target). The data agreed with  
249 previous observation using transient overexpression models [15]. For the other four compounds  
250 to which MDR1(PTX) cells also developed >2-fold increase of drug tolerance (i.e., DXR, IVM,  
251 MXT and VCT), their EC<sub>50</sub> values increased by 31.6% to 103.9% (vs. NC cells) (Fig 6B-6E;  
252 Table 4), meaning that the increase of drug tolerance affected the anti-cryptosporidial efficacies  
253 of the four compounds and their actions on host cells (i.e., off-target effect) also contributed to  
254 the killing of the parasite. Because the percent increases of EC<sub>50</sub> values were less than those of  
255 TC<sub>50</sub> values (e.g., for MXT, the percent change of EC<sub>50</sub> was 103.9% while that of TC<sub>50</sub> was  
256 172.7%) (Table 4), we might conclude that the off-target effects contributed partially to the  
257 killing of the parasite by the four inhibitors. In other words, both on-target and off-target effects  
258 contributed to the anti-cryptosporidial activities of the four inhibitors.

259 The development of NTZ-resistant cell line [i.e., MDR1(NTZ) cells] allowed us to evaluate the  
260 on-target effect of NTZ against *C. parvum* for the first time since its anti-cryptosporidial activity  
261 was discovered. In this assay, the increase of drug tolerance in host cells had no effect on the  
262 antiparasitic activity of NTZ based on the inhibitory curves and EC<sub>50</sub> values between WT, NC  
263 and MDR1(NTZ) cells (Fig 6F; Table 4; S3 Table). This result confirmed that, like PTX, NTZ  
264 inhibited the *C. parvum* growth by fully acting on the parasite target (i.e., 100% on-target).

265 **Table 4.** Anti-cryptosporidial efficacies ( $EC_{50}$ ) of selected compounds in specified cell lines in comparison with corresponding drug resistance  
 266 parameters and on/off-target rates calculated based on the ratios of percent (Pct) changes between  $EC_{50}$  and  $TC_{50}$  values\*

| Data obtained from MDR1(PTX) cell-based host cell model |                                                 |      |           |                    |                                                 |       |           |                    |                                 |                        |
|---------------------------------------------------------|-------------------------------------------------|------|-----------|--------------------|-------------------------------------------------|-------|-----------|--------------------|---------------------------------|------------------------|
| Compound                                                | Antiparasitic efficacy ( $EC_{50}$ ) ( $\mu$ M) |      |           |                    | Host cell cytotoxicity ( $TC_{50}$ ) ( $\mu$ M) |       |           |                    | On/off-target rate at $EC_{50}$ |                        |
|                                                         | WT                                              | NC   | MDR1(PTX) | Pct change (vs NC) | WT                                              | NC    | MDR1(PTX) | Pct change (vs NC) | Off-target ( $E_{off}$ )        | On-target ( $E_{on}$ ) |
| Paclitaxel (PTX)                                        | 0.31                                            | 0.30 | 0.29      | -3.3%              | 12.75                                           | 12.37 | 45.86     | 270.7%             | -1.2%                           | 101.2%                 |
| Mitoxantrone (MXT)                                      | 2.07                                            | 2.04 | 4.16      | 103.9%             | 4.31                                            | 4.11  | 11.21     | 172.7%             | 60.2%                           | 39.8%                  |
| Doxorubicin (DXR)                                       | 1.18                                            | 1.19 | 1.95      | 63.9%              | 4.03                                            | 4.34  | 10.43     | 140.3%             | 45.5%                           | 54.5%                  |
| Vincristine (VCT)                                       | 1.64                                            | 1.58 | 2.77      | 75.3%              | 6.72                                            | 7.15  | 21.51     | 200.8%             | 37.5%                           | 62.5%                  |
| Ivermectin (IVM)                                        | 3.16                                            | 3.23 | 4.25      | 31.6%              | 15.52                                           | 15.29 | 36.37     | 137.9%             | 22.9%                           | 77.1%                  |

  

| Data obtained from MDR1(NTZ) cell-based host cell model |                    |      |           |                    |       |       |           |                    |                     |                    |
|---------------------------------------------------------|--------------------|------|-----------|--------------------|-------|-------|-----------|--------------------|---------------------|--------------------|
| Compound                                                | WT                 | NC   | MDR1(NTZ) | Pct change (vs NC) | WT    | NC    | MDR1(NTZ) | Pct change (vs NC) | Off-target rate (%) | On-target rate (%) |
|                                                         | Nitazoxanide (NTZ) | 1.09 | 1.11      | 1.07               | -3.6% | 26.75 | 25.90     | 52.19              | 101.5%              | -3.6%              |

267 \*Percent (Pct) changes refer to the changes of  $EC_{50}$  or  $TC_{50}$  values in MDR1(X) cells (X = PTX or NTZ) in comparison to NC cells calculated using  
 268 following formulae:  $Pct\ change\ of\ EC_{50} = (EC_{50(MDR1(X))} - EC_{50(NTZ)})/EC_{50(NTZ)}$ ;  $Pct\ change\ of\ TC_{50} = (TC_{50(MDR1(X))} - TC_{50(NTZ)})/TC_{50(NTZ)}$ . The  $E_{on}$  and  $E_{off}$   
 269 refer the on-target and off-target effect calculated using formula:  $E_{off} = (Pct\ change\ of\ EC_{50})/(Pct\ change\ in\ TC_{50}) \times 100\%$ ;  $E_{on} = (1 - E_{off}) \times 100\%$ . Also  
 270 see [S3 Table](#) for a list of detailed parameters and values, including safety intervals (SI) and the ratios of SI between drug-selected and negative control  
 271 cell lines.

272

273 **Full or partial on-target effects were further validated using the MDR1 inhibitor elacridar**

274 If the increase of tolerance to a specified inhibitor in host cells was truly mediated by MDR1,  
275 specific inhibition of MDR1 would restore the sensitivity of the host cells to the inhibitor (as  
276 indicated by  $TC_{50}$ ). Additionally, inhibition of MDR1 would not affect the anti-cryptosporidial  
277 efficacy ( $EC_{50}$ ) if the drug that acted only on the parasite target, or partially affect the efficacy  
278 ( $EC_{50}$ ) if the drug that also acted on host cell target. This notion was tested using elacridar, a  
279 third generation of MDR1 inhibitor [16,20-22]. The concentration of elacridar at 300 nM was  
280 used based on previous studies that elacridar at this concentration could produce strong  
281 inhibition on the activity of MDR1 with no significant cytotoxicity to HCT-8 cells [15]. In this  
282 study, we also confirmed that elacridar at 300 nM produced no or little effect on the growth of  
283 the six cell lines and on the growth of *C. parvum* cultured with NC, MDR1(PTX) and  
284 MDR1(NTZ) cells (Fig 7). We then examined the effect of elacridar on the cytotoxicity and  
285 anti-cryptosporidial efficacies of the six inhibitors at concentrations near the 50% inhibition  
286 ranges.

287 In NC, MDR1, NC(PTX) and MDR1(PTX) cells, elacridar dramatically reduced the tolerance of  
288 these cells to PTX, MXT, DXR, VCT and IVM (Fig 8A, 8B), indicating that: 1) the increased  
289 tolerance to the five inhibitors in MDR1 and MDR1(PTX) cells was MDR1-dependent; and 2)  
290 there were a basal level of MDR1 in NC and NC(PTX) cells (negative controls) that could be  
291 inhibited by elacridar (Fig 8A and 8B, columns in black). However, elacridar had no effect on  
292 the anti-cryptosporidial activity of PTX in both NC and MDR1(PTX) cells (Fig 8C), confirming  
293 that the killing of *C. parvum* by PTX was unrelated to the MDR1 activity. In other words, the  
294 action of PTX on the host cell target had no effect on anti-cryptosporidial activity by PTX, so  
295 that its killing of *C. parvum* was solely attributed to its action on the parasite target (100%  
296 on-target). On the other hand, elacridar reduced the anti-cryptosporidial activities of MXT, DXR,  
297 VCT and IVM in both NC and MDR1(PTX) cells, indicating that the killing of *C. parvum* by the  
298 four inhibitors was associated with MDR1 activity, so that the actions of the four inhibitors on  
299 the host cell targets also contributed to the inhibition of the growth of *C. parvum*.

300 In the case of NTZ, elacridar had little effect on the cytotoxicity of NTZ in NC(NTZ) cells (Fig  
301 9A). This observation agreed with the fact that NTZ was not an MDR1 substrate, so that its

302 cytotoxicity should not be affected by the inhibition of basal level MDR1. The tolerance to NTZ  
303 in MDR1(NTZ) cells was reverted by elacridar (Fig 9A), indicating that the NTZ-resistance  
304 developed in MDR1(NTZ) cells was related to overexpressed MDR1. In the efficacy assay,  
305 elacridar had no effect on the anti-cryptosporidial activity of NTZ in both NC and MDR1(NTZ)  
306 cells (Fig 9B), confirming the killing of *C. parvum* by NTZ was unrelated to the MDR1 activity,  
307 or in other words, the action of NTZ on the host cell target made no contribution to the killing of  
308 *C. parvum*.

### 309 **Quantitative estimation of the relative contributions of on-target and off-target effects to** 310 **the observed anti-cryptosporidial activity**

311 **Estimation of on/off-target rates based on  $EC_{50}$  and  $TC_{50}$  values.** We showed that stable  
312 *MDR1*-transgenic cells could increase drug tolerance to MDR1 substrates or non-substrates in  
313 response to selection. These cell lines could serve as an in vitro model to assess whether an  
314 anti-cryptosporidial compounds killed *C. parvum* via acting fully (PTX and NTZ) or partially  
315 (MXT, DXR, VCT and IVM) on the parasite targets. We were also intrigued in quantifying the  
316 on/off-target rates to differentiate the proportions of contributions of on- and off-target effect to  
317 the antiparasitic activity. Because  $EC_{50}$  and  $TC_{50}$  were the most commonly used parameters for  
318 drug efficacy and cytotoxicity, we first attempted to develop a formula to calculate the  
319 on/off-target rates based on  $EC_{50}$  and  $TC_{50}$  values. The theory was that, the off-target rate at 50%  
320 efficacy (denoted as  $E_{50(\text{off})}$ ) was correlated to the ratio between the relative increase (or percent  
321 increase) of  $EC_{50}$  and the relative increase of  $TC_{50}$ , which could be calculated using the equation  
322 (see the equation derivations in the Methods section):

$$323 \quad E_{50(\text{off})} = \left( \frac{EC_{50(\text{MDR1})} - EC_{50(\text{NC})}}{EC_{50(\text{NC})}} \right) / \left( \frac{TC_{50(\text{MDR1})} - TC_{50(\text{NC})}}{TC_{50(\text{NC})}} \right) \times (100\%) \quad (1)$$

324 while the on-target rate at 50% efficacy (denoted as  $E_{50(\text{on})}$ ) could be calculated by:

$$325 \quad E_{50(\text{on})} = (1 - E_{50(\text{off})}) \times (100\%) \quad (2)$$

326 Using Eq. 1 and 2, we obtained theoretical on/off-target rates for the six compounds, in which  
327 the on-target rates for PTX and NTZ were 101.2% and 103.6%, respectively (Table 4). The  
328 values were slightly higher than 100% (the theoretical maximum) due to the assaying errors. The



329 other four compounds varied in their on/off-target rates, i.e., on-target rate 39.8% for MXT,  
330 54.5% for DXR, 62.5% for VCT and 77.1% for IVM (Table 4). It was noticeable that the  
331 off-target effects of MXT and DXR contributed more than 50% or near 50% to the observed  
332 anti-cryptosporidial activity at 50% efficacy.

333 **Estimation of on/off-target rates in the whole efficacy range.** In theory, an inhibitor at  
334 different concentrations might act at varied levels on the parasite target and host cell target. In  
335 other words, an inhibitor's on/off-target effects might differ in their contributions to the  
336 antiparasitic activity at varied efficacy levels. We denote  $E_{i(\text{on})}$  or  $E_{i(\text{off})}$  as the on-target or  
337 off-target rate for a compound at  $EC_i$  (the concentration of the compound inhibiting the parasite  
338 growth by  $i\%$ ;  $i = 0$  to 100). The off-target rate  $E_{i(\text{off})}$  at the specified efficacy  $EC_i$  could be  
339 estimated using the equation (see equation derivation in the Methods section):

$$340 \quad E_{i(\text{off})} = \left( \frac{EC_{i(\text{MDR1})} - EC_{i(\text{NC})}}{EC_{i(\text{NC})}} \right) \left/ \left( \frac{TC_{i(\text{MDR1})} - TC_{i(\text{NC})}}{TC_{i(\text{NC})}} \right) \right. \times (100\%) \quad (3)$$

341 while the on-target rate could be calculated by:

$$342 \quad E_{i(\text{on})} = (1 - E_{i(\text{off})}) \times (100\%) \quad (4)$$

343 where  $EC_i$  and  $TC_i$  ( $i = 0$  to 100) values were calculated using a 4-parameter logistic (4PL)  
344 model (see Eq. 9 and derivation). Using Eq. 3 and 4, we were able to plot the on/off-target rates  
345 for the six inhibitors over the entire efficacy range (Fig 10). Based on the relative linearity of the  
346 4PL model-derived sigmoidal curves (Fig 10), the on/off-target rates between  $EC_{10}/TC_{10}$  and  
347  $EC_{90}/TC_{90}$  might be considered more reliable and biologically relevant (also see S5 Table for  
348 representative  $E_{\text{on}}$  and  $E_{\text{off}}$  values between  $EC_{10}$  and  $EC_{90}$ ).

349 In the plots, both PTX and NTZ produced relatively parallel curves of  $E_{\text{on}}$  and  $E_{\text{off}}$  near 100%  
350 and 0%, respectively (Fig 10A, 10F). The  $E_{\text{on}}$  and  $E_{\text{off}}$  curves for IVM and VCT were also  
351 relatively parallel, showing higher contributions from the on-target effects ( $E_{10(\text{on})}$  to  $E_{90(\text{on})}$   
352 values = 81.6% to 73.4% for IVM, and 61.9% to 62.9% for VCT) (Fig 10B, 10C; S5 Table).  
353 There was a small surprise for DXR and MXT that showed lowest the  $E_{50(\text{on})}$  values as described  
354 above, in which the  $E_{\text{on}}$  and  $E_{\text{off}}$  curves were non-parallel and intersected (Fig 10D, 10E). The  
355 curves for DXR and MXT revealed that, at upper or lower effective concentrations, the on-target



356 effect contributed more to the antiparasitic activity of DXR and MXT, but this trend was  
357 reversed at higher effective concentrations after concentrations reached to certain points (i.e., at  
358  $E_{62}$  and  $E_{27}$ , respectively).

359 **Relationships between safety interval (SI), on-target rate and cytotoxicity.** It was noticed  
360 that an on-target inhibitor would have a larger safety interval (SI; aka selectivity index; or  $SI_{50}$   
361 for accuracy as it was determined by the  $TC_{50}/EC_{50}$  ratio) [15]. Here we further observed a  
362 certain linear relationship between  $E_{50(\text{on})}$  and SI in WT cells for the four partially on-target  
363 inhibitors (Fig 11A, green line). The SI values of the four inhibitors were all in single digits (i.e.,  
364  $SI = 0.21, 3.42, 4.1$  and  $4.91$  for MXT, DXR, VCT and IVM, respectively) in comparison to  
365 those in double digits for NTZ and PTX (i.e.,  $SI = 24.54$  and  $41.13$ , respectively). When  
366 nonlinear regressions were applied to all six compounds, the relationship between  $E_{50(\text{on})}$  and SI  
367 roughly followed the 4PL model (Fig 11A, red line;  $h = 1.891$ ;  $R^2 = 0.9882$ ). The authenticity of  
368 the nonlinear relationship remained to be confirmed after more values were available,  
369 particularly those in the upper quartile of  $E_{50(\text{on})}$  values. It was also apparent that the SI values for  
370 the four partially on-target and the two fully on-target inhibitors were separated by the 10-fold  
371 selectivity window that was commonly used as criterion at the hit stage of drug discovery [23].

372 We further examined the mathematical relationship between SI and cytotoxicity, aiming to  
373 explore whether SI in WT cells might serve as a hint for the quality of hits. The assumption was  
374 that, for a fully on-target inhibitor, the cytotoxicity would be null or minimal in the range of  
375 concentrations showing antiparasitic efficacy. Based the 4PL model, the following equation was  
376 derived (see the derivation of equations in the Methods section):

$$377 \quad T_{(\text{Ei})} = \left( \frac{k^h}{E_i} - k^h + 1 \right)^{-1} \quad (5)$$

378 where  $E_i$  denoted the antiparasitic efficacy [ $i = 0$  to  $100(\%)$ ],  $T_{(\text{Ei})}$  denoted the cytotoxicity of the  
379 inhibitor at the concentration producing the efficacy  $E_i$ ,  $k$  represented safety interval (SI) and  $h$   
380 represented the Hill slope (note that the  $i$  values could only approach 0 or  $100(\%)$ , but would  
381 never be equal to 0 or  $100(\%)$ ). In this equation,  $h$  values in the efficacy and cytotoxicity curves  
382 were set to be the same based on the assumption that a specified inhibitor would possess the  
383 same or similar mode of action on the parasite and host cells. The notion was supported in part

384 by the actual  $h$  values obtained in this study (S6 Table).

385 For the six compounds under investigation, both  $k$  and  $h$  were defined constants, thus allowing us  
386 to plot their relationship curves between the rates of calculated cytotoxicity and antiparasitic  
387 efficacy (Fig 11B). As expected, the cytotoxicity of all inhibitors rose along with the increase of  
388 efficacious concentrations but the trends were nonlinear and displayed as five concave and one  
389 convex rising curves. Curves were more skewed towards the two ends, e.g., at the 0-10% and  
390 90-100% efficacy regions. Overall, the increase rates of the curves were negatively correlated to  
391 the SI and on-target rates, i.e., inhibitors with higher  $k$  and  $E_{50(\text{on})}$  had a slower rate of increase of  
392 cytotoxicity, or vice versa. Apparently, the cytotoxicity values at  $EC_{50}$  for the two on-target  
393 inhibitors NTZ and PTX were less than 5% (calculated values = 2.73% and 1.92%, respectively),  
394 while those for the four partially on-target inhibitors were much higher (i.e., between 14.40%  
395 and 20.56% for IVM, VCT and DXR, and up to 84.61% for MXT) (Fig 11B). Only MXT  
396 produced a convex curve due to the fact that its SI value was less than 1 (i.e.,  $k = 0.21$ ). In fact,  
397 SI was the determinant for the curve curvature (i.e.,  $k = <1, 1, \text{ or } >1$  would produce convex,  
398 linear and concave curves, respectively).

399 Eq. 5 also provided an opportunity to examine the relationship between an inhibitor's theoretical  
400 cytotoxicity and the SI ( $k$ ) and Hill slope ( $h$ ) at specified efficacy. Based on the  $h$  values in this  
401 study (i.e., between 1.0 to 1.24), we plotted two sets of curves as examples to show the  
402 relationships between cytotoxicity,  $k$  (between 1 and 100) and  $h$  (between 0.8 and 2.0) at 50%  
403 and 90% efficacy concentrations (i.e.,  $EC_{50}$  and  $EC_{90}$ ; the two commonly used parameters for  
404 drug efficacy) (Fig 11C, 11D). From the two plots, we observed that: 1) with fixed  $h$  and  $k$   
405 values, an inhibitor's cytotoxicity was higher at higher efficacious concentrations (e.g.,  $T_{(E90)} >$   
406  $T_{(E50)}$ ); 2) with fixed  $h$  and efficacy, all curves declined more sharply at lower  $k$  values, more  
407 apparently at  $k < 10$ ; and 3) with fixed  $k$  and efficacy, the cytotoxicity was negatively correlated  
408 with the  $h$  values (i.e., a lower toxicity at higher  $h$  value). Nonetheless, the plots gave us a new  
409 perspective to examine and compare the properties of inhibitors that might not be easily seen  
410 from the efficacy/cytotoxicity curves and commonly used parameters (e.g.,  $EC_{50}$ ,  $TC_{50}$  and SI  
411 values). The effect of Hill slope ( $h$ ) on cytotoxicity was a novel observation, although it might be  
412 noticeable by careful comparison between the cytotoxicity and efficacy curves (Fig 6).

## 413 Discussion

414 The multidrug resistance protein 1 (MDR1), also known as P-glycoprotein 1 (P-gp),  
415 ATP-binding cassette subfamily B member 1 (ABCB1), is an ATP-dependent efflux pump with  
416 broad substrate specificity [24,25]. Both transient and stable overexpression of MDR1 in HCT-8  
417 cells could increase the tolerance of cells to multiple compounds, but the two models have their  
418 own advantages and disadvantages. In the transient transfection model, host cells overexpressing  
419 MDR1 could be generated instantly to show >2-fold increases of drug tolerance to multiple  
420 compounds, but applicable only to MDR1 substrates [15]. In stable transfection model as  
421 demonstrated in this study, it might take months to first generate *MDR1*-transgenic cells that  
422 only showed <2-fold increases of drug tolerance. However, drug tolerance in *MDR1*-transgenic  
423 cells could be quickly increased to much higher than 2-fold by applying continuous drug  
424 pressure. The notable advantage of the stable transfection model is the potential to generate  
425 novel resistance to non-MDR1 substrates in a reasonably short timeframe that is otherwise  
426 unachievable using transient transfection model. As exemplified in this study, NTZ-resistance  
427 was generated in *MDR1*-transgenic HCT-8 cells in three months (>2-fold in MDR1(NTZ) cell  
428 vs. WT or NC cells). This allows us to validate for the first time that NTZ, the only  
429 FDA-approved drug to treat human cryptosporidial infection, kills *C. parvum* by solely acting on  
430 the parasite target (100% on-target).

431 NTZ is a thiazolide compound with a relatively broad spectrum of activity against anaerobic  
432 bacteria and parasites by targeting pyruvate:ferredoxin/flavodoxin oxidoreductase (PFOR)  
433 involved in anaerobic metabolism. NTZ displays low micromolar inhibition constant ( $K_i = 2$  to  
434  $10 \mu\text{M}$ ) on PFOR from the protozoan parasites *Trichomonas vaginalis*, *Entamoeba histolytica*  
435 and *Giardia intestinalis* and the bacterial pathogens *Clostridium difficile*, *Clostridium*  
436 *perfringens*, *Helicobacter pylori* and *Campylobacter jejuni* [26]. However, the mode of action of  
437 NTZ against cryptosporidial infection is yet undefined. In *Cryptosporidium* parasites, PFOR is  
438 fused with a NADPH-cytochrome P450 reductase to form a unique bifunctional enzyme  
439 pyruvate:NADP<sup>+</sup> oxidoreductase (PNO) [27]. The confirmation that NTZ is fully on-target in  
440 this study justifies that the parasite PNO is worth to be investigated and explored for developing  
441 more selective and effective anti-cryptosporidial drugs.

442 To our knowledge, this study represents the first attempt to develop algorithms for quantifying  
443 the proportional contributions of on-target and off-target effects to the overall anti-infective  
444 efficacy. Although the algorithms are developed under the experimental conditions used in this  
445 study, they are modifiable to suit other experimental settings. One noteworthy application of the  
446 algorithms is to evaluate and quantify the on/off-target effects in developing drugs targeting host  
447 cell targets localized inside the cells.

448 It is worth to clarify again that: 1) the *MDR1*-transfected cell models are applicable only to  
449 evaluating the on/off-target effects on epicellular pathogens (e.g., *C. parvum*) whose drug  
450 exposure would not be affected by MDR1 efflux. It is not applicable to pathogens residing in the  
451 host cytoplasm (e.g., *Toxoplasma* and *Eimeria* parasites) whose drug exposures would also be  
452 affected by MDR1 efflux; and 2) The in vitro models and algorithms are used to evaluate  
453 whether an applicable inhibitor kills the parasite by acting fully or partially on the parasite target,  
454 rather than evaluating whether an inhibitor acts on a specific biochemical target.

## 455 **Conclusions**

456 We have developed an *MDR1*-transgenic cell-based model applicable to evaluating whether  
457 anti-cryptosporidial hits/leads kill the parasite by fully or partially targeting the parasite targets.  
458 The hits/leads can be either MDR1 substrates or non-MDR1 substrates. Using the model, we  
459 have validated that paclitaxel (PTX) and nitazoxanide (NTZ) kill *C. parvum* by fully acting on  
460 the parasite targets (100% on-target), while mitoxantrone (MTX), doxorubicin (DXR),  
461 vincristine (VCT) and ivermectin (IVM) kill the parasite by acting on both the parasite and host  
462 cell targets (partially on-target). We have also developed algorithms to quantify the percent  
463 contributions of on- and off-target effects to the observed anti-cryptosporidial efficacy in vitro,  
464 and to examine the relationships between anti-cryptosporidial efficacy ( $EC_i$ ), cytotoxicity ( $TC_i$ ),  
465 safety interval ( $SI$  or  $k$ ) and Hill slope ( $h$ ).

## 466 **Materials and methods**

467 **In vitro culture of *C. parvum* and assays for anti-cryptosporidial efficacy and drug**  
468 **tolerance in host cell lines**

469 A strain of *C. parvum* with subtype IIaA17G2R1 at the *gp60* locus was propagated in the  
470 laboratory by infecting calves, from which oocysts were collected from feces and stored in PBS  
471 containing 200 U/mL penicillin and 0.2 mg/mL streptomycin at 4 °C until use. Prior to use,  
472 oocysts were purified by a sucrose/CsCl gradient centrifugation protocols, followed by a 5-min  
473 treatment of 10% house bleach in ice and extended washes with distilled water [28-30]. The  
474 viability of the oocysts was assessed by in vitro excystation in PBS containing 0.5% taurocholic  
475 acid sodium salt hydrate at 37 °C for 1 h, and only those with >85% excystation rates were used  
476 in experiments.

477 HCT-8 cells (National Collection of Authenticated Cell Cultures, Shanghai, China) was used as a  
478 parent wild-type (WT) cell line for generating *MDRI*-transgenic cells for assaying in vitro drug  
479 efficacy against *C. parvum*. Host cells were maintained in 25 cm<sup>2</sup> flasks containing RPMI-1640  
480 medium, 10% fetal bovine serum (FBS) and 1.0% penicillin-streptomycin at 37 °C under 5%  
481 CO<sub>2</sub> atmosphere. Anti-cryptosporidial efficacy assay was performed using an established  
482 protocol [31,32]. Briefly, host cells including WT and its derived transgenic cell lines were  
483 seeded in 96-well plates overnight until ~80% confluence and inoculated with *C. parvum* oocysts  
484 ( $2 \times 10^4$  per well). After 3 h incubation to allow excystation and invasion of *C. parvum*  
485 sporozoites, uninvaded parasites were removed by a medium exchange. Compounds at specified  
486 concentrations were added at this time point, and infected host cells were incubated for  
487 additional 41 h (total 44 h of infection). Cell lysates were prepared using an iScript qRT-PCR  
488 sample preparation reagent (50 µL/well) (Bio-Rad Labs, California, CA) [31,32].

489 Cell lysates were diluted by 100-fold for detecting *C. parvum* 18S (*Cp18S*) rRNA and 2000-fold  
490 for detecting host cell 18S (*Hs18S*) rRNA by qRT-PCR using TransScript Green One-Step  
491 qRT-PCR SuperMix (TransGen Biotech, Beijing, China) in a StepOnePlus Real-Time PCR  
492 System (Applied Biosystems, Waltham, MA, USA). Each reaction included 3 µL diluted cell  
493 lysate, 10 µL 2× SuperMix solution, 0.4 µL forward and reverse primers (10 µM each), 0.4 µL  
494 Passive Reference Dye I, 0.4 µL TransScript One-Step RT/RI Enzyme Mix, and 5.4 µL  
495 RNase-free Water (total 20 µL), using primers specified in **S4 Table**. Anti-cryptosporidial  
496 activity was indicated by half-maximal effective concentration (EC<sub>50</sub> values) by nonlinear  
497 regression with a 4-parameter logistic (4PL) model using Prism (v9.0; GraphPad, San Diego,  
498 CA).

499 Host cell drug tolerance to specified inhibitors was evaluated by an MTS assay. WT and  
500 transgenic host cells were seeded in 96-well plates (10,000 cells/well) and cultured for 24 h,  
501 followed by the addition of specified compounds at serially diluted concentrations and continued  
502 culture for 41 h. After 3 washes with serum-free medium, MTS solution (Saint-Bio, Shanghai,  
503 China) was added into the plates (20  $\mu$ L/well) and incubated at 37 °C for 2 h. Optical density at  
504 490 nm ( $OD_{490}$ ) was measured using a Synergy LX multi-mode reader (BioTek, Winooski, VT).  
505 Drug tolerance was indicated by half-maximal cytotoxic concentrations ( $TC_{50}$  values) calculated  
506 by nonlinear regression using 4PL model. Safety interval (SI) for each compound was  
507 determined by the ratio between  $TC_{50}$  and  $EC_{50}$  values ( $SI = TC_{50}/EC_{50}$ ) [33,34].

### 508 **Development of stable transgenic cell lines and detection of *MDR1* gene expression**

509 A lentiviral expression vector system including pCDH-CMV-MDR1-EF1 $\alpha$ -copGFP-T2A-puro  
510 lentivector, psPAX2 and pMD2G helper plasmids was used to generate *MDR1*-transgenic cell  
511 lines (Xiamen Anti-hela Biological Technology Co., Xiamen, China). Blank vector  
512 pCDH-CMV-MCS-EF1 $\alpha$ -copGFP-T2A-puro was used as negative control (Fig. 2A).  
513 Recombinant lentiviruses were prepared by co-transfection of 293T cells with the  
514 vectors/plasmids, followed by collection of lentiviruses in the supernatant and determination of  
515 the viral titers [35]. Parent HCT-8 cells (WT) were infected with the lentiviral preparations for  
516 48 h, followed by selection with puromycin (4  $\mu$ g/ml) for 7 days. The resulting transgenic cell  
517 lines were designated as HCT-8/MDR1 (or MDR1 for short) that overexpressed MDR1 and  
518 HCT-8/NC (or NC) that carrying negative control blank vector (Table 1).

519 The morphology of WT, NC and MDR1 cells were examined by immunofluorescence assay  
520 (IFA), in which cells were cultured in 48-well plates containing glass coverslips coated with 0.1  
521 mg/mL poly-L-lysine for 1 d. Cell monolayers were fixed in 4% paraformaldehyde for 10 min and  
522 permeabilized with 0.5% Triton X-100 in PBS for 5 min, followed by blocking with PBS buffer  
523 containing 3% BSA. MDR1 was detected by incubation with a rabbit monoclonal anti-MDR1  
524 antibody (Cell Signaling Technology Co., Danvers, MA) (1:200 dilution) overnight at 4 °C and  
525 anti-rabbit antibody conjugated with Alexa Fluor 594. There were three washes with PBS for 5  
526 min after each treatment step. The same IFA procedures was also used to detect whether there  
527 was any enrichment of MDR1 at the host cell-parasite interface in specified host cells infected



528 with *C. parvum* for 24 h.

529 The relative levels of *MDR1* expression were determined at protein and mRNA levels by western  
530 blot analysis and qRT-PCR, respectively. WT, NC and MDR1 cells were cultured in 24-well  
531 plates for 1 d or as specified and collected for preparation of protein extracts and isolation of  
532 total RNA. In western blot analysis, host cells were washed three times with PBS and lysed in  
533 radio-immunoprecipitation assay (RIPA) buffer (Sigma-Aldrich Co., Saint Louis, MO, USA; 50  
534  $\mu\text{L}/\text{well}$ ). Proteins extracts (15  $\mu\text{g}/\text{lane}$ ) were fractionated by 10% SDS-PAGE and transferred  
535 onto nitrocellulose membranes. The blots were incubated with rabbit anti-MDR1 (1:1000)  
536 (Abcam, Cambridge, UK; Cat. # ab170904) or rabbit anti-GAPDH antibodies (1:5000)  
537 (Proteintech Inc., Rosemont, IL, USA; Cat. # 10494-1-AP) in PBS buffer containing 5% skim  
538 milk overnight at 4 °C, followed by incubation with horseradish peroxidase (HRP)-conjugated  
539 Affinipure goat anti-rabbit IgG (1:5000) (Proteintech; Cat. # SA00001-2) for 1 h. The blots were  
540 developed using FGSuper Sensitive ECL Luminescence Reagent (Meilunbio, Dalian, China).

541 In qRT-PCR assay, total RNA was isolated from cells using Trizol RNA isolation kit (Takara,  
542 Shiga, Japan) and *MDR1* and *GAPDH* transcripts were detected using a TransScript Green  
543 One-Step qRT-PCR SuperMix (TransGen Biotech, Beijing, China). The reactions (20  
544  $\mu\text{L}/\text{reaction}$ ) contained 20 ng total RNA, 10  $\mu\text{L}$  2 $\times$  SuperMix solution, 0.4  $\mu\text{L}$  forward and  
545 reverse primers (10  $\mu\text{M}$  each), 0.4  $\mu\text{L}$  passive reference dye I, 0.4  $\mu\text{L}$  TransScript One-Step  
546 RT/RI Enzyme Mix and 5.4  $\mu\text{L}$  RNase-free water, and were performed using a StepOnePlus  
547 real-time PCR system (Applied Biosystems, Waltham, MA). Primers for *MDR1* and *GAPDH*  
548 were listed in [S4 Table](#).

#### 549 **Generation of cell lines with increased drug tolerance to MDR1 substrate paclitaxel (PTX)** 550 **and non-substrate nitazoxanide (NTZ)**

551 Stable *MDR1*-transgenic cell line (MDR1 cells) was more resistant than WT and NC cell lines to  
552 five of the nine compounds tested in this study, but the increases were less than 2-fold (ranging  
553 from 1.54 to 1.76) ([Table 2](#)), which were less ideal for evaluating on/off-target effects for these  
554 compounds and useless in evaluating other compounds. Since MDR1 was responsible for the  
555 development of multidrug resistance in cancer cells for a large number of therapeutics [[36-38](#)],  
556 we hypothesized that overexpression of *MDR1* would make host cells more adaptable than WT

557 and NC cells to the drug selection pressure for rapid increase of resistance to MDR1 substrates  
558 (e.g., PTX) and induction of resistance to non-substrates (e.g., NTZ). To test the hypothesis, WT,  
559 NC and MDR1 cells were subjected to selection by PTX and NTZ.

560 We employed a drug selection scheme similar to those reported by other investigators [39-41], in  
561 which cells were subjected to multiple rounds of drug selection with incrementally increased  
562 drug concentrations, each round containing 2-3 cycles of 2-d drug selection at ~80% inhibition  
563 concentrations followed by 3–5 d of drug withdrawal to allow the growth of host cells to near  
564 confluence (see [S2 Table](#) for detailed drug selection design). More specifically, WT, NC and  
565 MDR1 cells were cultured in 6-well plates ( $2 \times 10^5$  cells/well) to confluence and incubated with  
566 PTX at 0.75  $\mu\text{M}$  (WT and NC cells) or 1.5  $\mu\text{M}$  (MDR1 cells) or NTZ at 3.0  $\mu\text{M}$  (WT, NC and  
567 MDR1 cells) for 2 d (the drug concentrations were near their  $\text{TC}_{80}$  values determined by 48-h  
568 cytotoxicity assay). Surviving cells were allowed to recover in drug-free medium for 3–5 d to  
569 near confluence (round 1). The selection/recovery cycle were repeated once (round 2). Cells  
570 were then subjected to a serial new rounds of selection/recovery cycles with incrementally  
571 increased drug concentrations until MDR1 cells could grow normally in the presence of 7.61  $\mu\text{M}$   
572 of PTX or 15.20  $\mu\text{M}$  of NTZ (round 11). At this time point, WT and NC cells could grow  
573 normally in the presence of 1.70  $\mu\text{M}$  PTX or 10.13  $\mu\text{M}$  NTZ ([S2 Table](#)). Finally, all cells were  
574 cultured at the final selection concentrations of PTX or NTZ for  $\geq 7$  d, followed by culture in  
575 drug-free medium for 14 d. At this time point, cells were used for cytotoxicity and efficacy  
576 assays or cryopreserved in a liquid nitrogen tank. The resulting cell lines after PTX or NTZ  
577 selection were designated as WT(PTX), NC(PTX) and MDR1(PTX), or WT(NTZ), NC(NTZ)  
578 and MDR1(NTZ), respectively ([Table 1](#); [S2 Table](#)).

## 579 **Mathematical models for quantitative estimation of relative contributions from the on- and** 580 **off-target effects to the anti-cryptosporidial efficacy**

581 **Model based on  $EC_{50}$  and  $TC_{50}$  values.** Let us denote  $E_{\text{on}}$  and  $E_{\text{off}}$  as the on- and off-target  
582 rates, and  $E_{\text{obs}}$  as the observed anti-parasitic efficacy, representing the proportions or percents  
583 of on/off-target effects contributing to the observed anti-cryptosporidial efficacy. The observed  
584 anti-parasitic efficacy ( $E_{\text{obs}}$ ) is the sum of  $E_{\text{on}}$  and  $E_{\text{off}}$  that was set to 100%:

$$585 \quad E_{\text{obs}} = E_{\text{on}} + E_{\text{off}} = 100\% \quad (6)$$



586 Under the condition that the drug tolerance is significantly increased in the drug-resistant cell  
 587 line (e.g., >2-fold increase between  $TC_{50(\text{MDR1})}$  and  $TC_{50(\text{NC})}$ ), where MDR1 represents  
 588 MDR1-derived cell lines such as MDR1(PTX) and MDR1(NTZ) cells, the relative contributions  
 589 of  $E_{\text{on}}$  and  $E_{\text{off}}$  to  $E_{\text{obs}}$  can be indicated by whether, and how much, the anti-parasitic efficacy is  
 590 also increased proportionally. More specifically, we may estimate the percent contribution of  $E_{\text{off}}$   
 591 to  $E_{\text{obs}}$  by calculating whether and how the relative increase of anti-parasitic efficacy ( $RI_{\text{EC50}}$ ) is  
 592 proportionally correlated to the relative increase of drug tolerance between ( $RI_{\text{TC50}}$ ), or the ratio  
 593 between  $RI_{\text{EC50}}$  and  $RI_{\text{TC50}}$  using the following equations:

$$594 \quad RI_{\text{EC50}} = \frac{\Delta EC_{50}}{EC_{50(\text{NC})}} = \frac{EC_{50(\text{MDR1})} - EC_{50(\text{NC})}}{EC_{50(\text{NC})}} = \frac{EC_{50(\text{MDR1})}}{EC_{50(\text{NC})}} - 1 \quad (7)$$

$$595 \quad RI_{\text{TC50}} = \frac{\Delta TC_{50}}{TC_{50(\text{NC})}} = \frac{TC_{50(\text{MDR1})} - TC_{50(\text{NC})}}{TC_{50(\text{NC})}} = \frac{TC_{50(\text{MDR1})}}{TC_{50(\text{NC})}} - 1 \quad (8)$$

$$596 \quad E_{50(\text{off})} = \frac{RI_{\text{EC50}}}{RI_{\text{TC50}}} = \frac{\left(\frac{EC_{50(\text{MDR1})}}{EC_{50(\text{NC})}} - 1\right)}{\left(\frac{TC_{50(\text{MDR1})}}{TC_{50(\text{NC})}} - 1\right)} \times (100\%) \quad (9)$$

597 Eq. 9 can be rearranged to obtain Eq. 1 described in the Results section:

$$598 \quad E_{50(\text{off})} = \left(\frac{EC_{50(\text{MDR1})} - EC_{50(\text{NC})}}{EC_{50(\text{NC})}}\right) \bigg/ \left(\frac{TC_{50(\text{MDR1})} - TC_{50(\text{NC})}}{TC_{50(\text{NC})}}\right) \times (100\%) \quad (1)$$

599 Based on Eq. 6, we also obtain Eq. 2 described in the Results section:

$$600 \quad E_{50(\text{on})} = (1 - E_{50(\text{off})}) \times (100\%) \quad (2)$$

601 **Expansion of the model to the whole efficacy range from  $EC_0$  to  $EC_{100}$ .** Dose-dependent  
 602 efficacy and cytotoxicity kinetic curves generally follow a 4-parameter logistic (4PL) sigmoidal  
 603 model [42]:

$$604 \quad Y = \frac{E_{\text{max}} - E_{\text{min}}}{1 + \left(\frac{E_{50}}{X}\right)^h} + E_{\text{min}} \quad (10)$$

605 where  $Y$  is the response (theoretically ranging from 0 to 1 probability values) and  $X$  is the drug  
 606 concentration.  $E_{\text{min}}$  and  $E_{\text{max}}$  are the lower and upper plateaus of the curve (also termed Bottom

607 and Top). The parameter  $h$  is the slope factor of the curve (Hill slope). The  $E_{50}$  (= either  $EC_{50}$  or  
608  $TC_{50}$ ) is the concentration to achieve the midway response between  $E_{\min}$  and  $E_{\max}$ .

609 In a drug efficacy assay based on quantitation of relative parasite loads by qRT-PCR and a  
610 cytotoxicity test based on colorimetric or fluorescent assay, the response ( $Y$ ) can be converted to  
611 the percent inhibition on the parasite or on host cell, in which  $E_{\min}$  is normalized to zero (i.e., the  
612 response to diluent in the negative controls). Eq. 10 is then simplified to:

$$613 \quad Y = \frac{E_{\max}}{1 + \left(\frac{E_{50}}{X}\right)^h} = \frac{E_{\max} \cdot X^h}{E_{50}^h + X^h} \quad (11)$$

614 Ideally, the parameter  $E_{\max}$  value is 1 (100%), by which  $E_{50}$  (solved from the equation) is the  
615 inhibitor's concentration that truly achieves 50% inhibition, referred to as "absolute  $EC_{50}$  or  
616  $TC_{50}$ " [42]. However,  $E_{\max}$  might not reach 100% in many assays, in which  $E_{50}$  solved from Eq.  
617 10 is relative to the upper plateau, referred to as "relative  $EC_{50}$  or  $TC_{50}$ " (Note: this study  
618 reported relative  $EC_{50}$  or  $TC_{50}$  values).

619 Eq. 1 and 2 could be generalized to:

$$620 \quad E_{i(\text{off})} = \left( \frac{EC_{i(\text{MDR1})} - EC_{i(\text{NC})}}{EC_{i(\text{NC})}} \right) \left/ \left( \frac{TC_{i(\text{MDR1})} - TC_{i(\text{NC})}}{TC_{i(\text{NC})}} \right) \right. \times (100\%) \quad (3)$$

$$621 \quad E_{i(\text{on})} = (1 - E_{i(\text{off})}) \times (100\%) \quad (4)$$

622 where  $i$  represents percent inhibition on the parasite ( $EC_i$ ) or on host cells ( $TC_i$ ). A full range of  
623  $EC_i$  and  $TC_i$  ( $i = 0 - 100$ ) can be calculated by nonlinear regression using Eq. 10. Kinetic curves  
624 representing the proportions of  $E_{\text{on}(i)}$  and  $E_{\text{off}(i)}$  (representing on/off-target rates) can be plotted  
625 for a specified inhibitor over the entire range of efficacy ranging from  $EC_0$  to  $EC_{100}$ , as for the  
626 six compounds investigated in this study (Fig 10). An open source Python code to plot the  $E_{\text{on}(i)}$   
627 and  $E_{\text{off}(i)}$  curves from parameters  $EC_{50}$ ,  $TC_{50}$  and Hill slope  $h$  was developed and deposited at  
628 the GitHub depository (<https://github.com/alienn233/PACOOTER>).

### 629 **Derivation of equations to visualize the relationship between safety interval (SI) and**

630 **cytotoxicity over a drug's efficacious concentrations.** The principal here is to plot the

631 cytotoxicity (inhibition rates on host cell growth; denoted by  $Y_{\text{TC}}$ ) of a specified inhibitor against

632 the concentrations of the inhibitor over the range showing anti-cryptosporidial efficacy (denoted  
633 by  $Y_{EC}$ ) in WT cells. Based on the 4PL model (Eq. 10), we have:

$$634 \quad Y_{TC(EC_i)} = \frac{X_{EC_i}^h}{TC_{50}^h + X_{EC_i}^h} \quad (12)$$

635 where  $X_{EC_i}$  is the concentration of the inhibitor at anti-cryptosporidial efficacy  $EC$ .  $Y_{TC(EC_i)}$  is the  
636 cytotoxicity rate of the inhibitor at the concentration  $EC_i$  ( $i = 0$  to 100%).

637 Since  $SI$  is defined by the ratio between  $TC_{50}$  and  $EC_{50}$ , we have:

$$638 \quad TC_{50} = SI \times EC_{50} = k \times EC_{50} \quad (13)$$

639 where  $k$  is  $SI$  for simplicity. The parameter  $k$  in Eq. 13 can be introduced into Eq. 12:

$$640 \quad Y_{TC(EC_i)} = \frac{X_{EC_i}^h}{(k \times EC_{50})^h + X_{EC_i}^h} \quad (14)$$

641 The anti-cryptosporidial efficacy, denoted by  $Y_{EC_i}$  here for clarity, can be introduced into Eq. 14  
642 to replace  $X_{EC_i}$  based on the 4PL model again:

$$643 \quad Y_{EC_i} = \frac{X_{EC_i}^h}{EC_{50}^h + X_{EC_i}^h} \quad (15)$$

644 which can be derived to:

$$645 \quad X_{EC_i}^h = \frac{Y_{EC_i} \times EC_{50}^h}{1 - Y_{EC_i}} \quad (16)$$

646 After placing Eq. 16 into Eq. 14 and some derivations, we obtain the following simplified  
647 equation to define  $Y_{TC(EC_i)}$  as the function of  $Y_{EC_i}$ ,  $k$  and  $h$  (i.e., Eq. 5 in the Results section):

$$648 \quad Y_{TC(EC_i)} = \left( \frac{k^h}{Y_{EC_i}} - k^h + 1 \right)^{-1} \quad (5)$$

649 where the  $h$  values in both efficacy and cytotoxicity curves are assumed to be the same after  
650 considering that a specified inhibitor would likely act on the same or similar targets in the  
651 parasite and the host cells. This assumption is also supported by the  $h$  values for the six

652 inhibitors obtained in this study, in which the  $h$  values range from 1.0 to 1.24 and differ by  
653 0.40% to 2.87% between efficacy and cytotoxicity curve pairs (S6 Table).

## 654 **Data analysis and statistics**

655 At least two independent experiments were conducted for each experiment condition. Each  
656 experiment contained minimal 2 or biological replicates for experimental groups or negative  
657 controls, respectively. In qRT-PCR assay used 2 or 3 technical replicates. In vitro efficacy and  
658 cytotoxicity data were analyzed using Prism (v9.0 or higher; GraphPad, San Diego, CA) using a  
659 4-parameter logistic model. Statistical significances were evaluated by two-way analysis of  
660 variance (ANOVA) and Holm-Šídák multiple  $t$ -test between group pairs [34].

## 661 **Supporting Information**

662 **S1 Fig.** Illustration of the possible actions of inhibitors on *Cryptosporidium parvum* in vitro. **(A)**  
663 Diagram of a developing meront of *C. parvum* in vitro. This epicellular parasite is contained  
664 within a parasitophorous vacuole membrane (PVM) derived from host cell plasma membrane  
665 (thus intracellular), but separated from host cell cytoplasm by an electron-dense (ED) layer (thus  
666 extra-cytoplasmic). **(B)** The observed anti-cryptosporidial efficacy of an inhibitor could be  
667 attributed to: 1) the action solely on the parasite target (= fully on-target); 2) the action solely on  
668 the host cell target (= fully off-target); or 3) on both the parasite and host cell targets (= partially  
669 on-target). Depending on the property of the inhibitor, on- and off-target effects might contribute  
670 to the observed anti-cryptosporidial activity at varied levels.

671 **S1 Table.** List of the compounds used in this study and effect of overexpression of MDR1 and  
672 drug selection by PTX or NTZ on drug tolerance profiles.

673 **S2 Table.** Drug selection strategy and experimental design.

674 **S3 Table.** Relationship between anti-cryptosporidial efficacy ( $EC_{50}$ ), drug tolerance as indicated  
675 by cytotoxicity ( $TC_{50}$ ) and safety interval (SI) of selected compounds in specified cell lines.

676 **S4 Table.** PCR primers used in this study.

677 **S5 Table.** Percent contributions of the on-target and off-target effects of the six compounds to

678 the anti-cryptosporidial activity in vitro at selected EC values (between EC<sub>10</sub> and EC<sub>90</sub>) as  
679 calculated using Eq. 3 and 4.

680 **S6 Table.** Hill slope (h) values in the anti-cryptosporidial efficacy and cytotoxicity assays in all  
681 cell lines

682

### 683 **Author Contributions**

684 **Conceptualization:** Guan Zhu

685 **Data curation:** Bo Yang, Guan Zhu

686 **Formal analysis:** Bo Yang, Yueyang Yan, Guan Zhu

687 **Funding acquisition:** Guan Zhu, Jigang Yin

688 **Investigation:** Bo Yang, Yueyang Yan, Dongqiang Wang, Ying Zhang, Jigang Yin

689 **Methodology:** Bo Yang, Dongqiang Wang, Guan Zhu

690 **Project administration:** Guan Zhu

691 **Supervision:** Guan Zhu

692 **Validation:** Bo Yang, Guan Zhu

693 **Visualization:** Bo Yang, Yueyang Yan, Guan Zhu

694 **Writing – original draft:** Bo Yang, Guan Zhu

695 **Writing – review & editing:** Guan Zhu

696

## 697 **References**

- 698 1. Adamu H, Petros B, Zhang G, Kassa H, Amer S, Ye J, et al. Distribution and clinical manifestations  
699 of *Cryptosporidium* species and subtypes in HIV/AIDS patients in Ethiopia. PLoS Negl Trop Dis.  
700 2014;8(4):e2831. Epub 2014/04/20. doi: 10.1371/journal.pntd.0002831. PubMed PMID: 24743521;  
701 PubMed Central PMCID: PMCPMC3990574.
- 702 2. O'Connor R M, Shaffie R, Kang G, Ward HD. Cryptosporidiosis in patients with HIV/AIDS. AIDS.  
703 2011;25(5):549-60. Epub 2010/12/17. doi: 10.1097/QAD.0b013e3283437e88. PubMed PMID:  
704 21160413.
- 705 3. Checkley W, White AC, Jr., Jaganath D, Arrowood MJ, Chalmers RM, Chen XM, et al. A review of  
706 the global burden, novel diagnostics, therapeutics, and vaccine targets for cryptosporidium. Lancet  
707 Infect Dis. 2015;15(1):85-94. Epub 2014/10/04. doi: 10.1016/S1473-3099(14)70772-8. PubMed  
708 PMID: 25278220; PubMed Central PMCID: PMCPMC4401121.
- 709 4. Innes EA, Chalmers RM, Wells B, Pawlowic MC. A One Health Approach to Tackle  
710 Cryptosporidiosis. Trends Parasitol. 2020;36(3):290-303. Epub 2020/01/28. doi:  
711 10.1016/j.pt.2019.12.016. PubMed PMID: 31983609; PubMed Central PMCID:  
712 PMCPMC7106497.
- 713 5. Shaw HJ, Innes EA, Morrison LJ, Katzer F, Wells B. Long-term production effects of clinical  
714 cryptosporidiosis in neonatal calves. Int J Parasitol. 2020;50(5):371-6. Epub 2020/04/12. doi:  
715 10.1016/j.ijpara.2020.03.002. PubMed PMID: 32277986; PubMed Central PMCID:  
716 PMCPMC7194893.
- 717 6. Fox LM, Saravolatz LD. Nitazoxanide: a new thiazolide antiparasitic agent. Clin Infect Dis.  
718 2005;40(8):1173-80. Epub 2005/03/26. doi: 10.1086/428839. PubMed PMID: 15791519.
- 719 7. Smith HV, Corcoran GD. New drugs and treatment for cryptosporidiosis. Curr Opin Infect Dis.  
720 2004;17(6):557-64. Epub 2005/01/11. doi: 10.1097/00001432-200412000-00008. PubMed PMID:  
721 15640710.
- 722 8. Baragana B, Forte B, Choi R, Nakazawa Hewitt S, Bueren-Calabuig JA, Pisco JP, et al. Lysyl-tRNA  
723 synthetase as a drug target in malaria and cryptosporidiosis. Proc Natl Acad Sci U S A.  
724 2019;116(14):7015-20. Epub 2019/03/22. doi: 10.1073/pnas.1814685116. PubMed PMID:  
725 30894487; PubMed Central PMCID: PMCPMC6452685.
- 726 9. Castellanos-Gonzalez A, White AC, Jr., Ojo KK, Vidadala RS, Zhang Z, Reid MC, et al. A novel  
727 calcium-dependent protein kinase inhibitor as a lead compound for treating cryptosporidiosis. J  
728 Infect Dis. 2013;208(8):1342-8. Epub 2013/07/24. doi: 10.1093/infdis/jit327. PubMed PMID:  
729 23878324; PubMed Central PMCID: PMCPMC3778970.

- 730 10. Manjunatha UH, Vinayak S, Zambriski JA, Chao AT, Sy T, Noble CG, et al. A *Cryptosporidium*  
731 PI(4)K inhibitor is a drug candidate for cryptosporidiosis. *Nature*. 2017;546(7658):376-80. Epub  
732 2017/06/01. doi: 10.1038/nature22337. PubMed PMID: 28562588; PubMed Central PMCID:  
733 PMCPMC5473467.
- 734 11. Love MS, Choy RKM. Emerging treatment options for cryptosporidiosis. *Curr Opin Infect Dis*.  
735 2021;34(5):455-62. doi: 10.1097/QCO.0000000000000761. PubMed PMID: 34261904; PubMed  
736 Central PMCID: PMCPMC7611666.
- 737 12. Shoultz DA, de Hostos EL, Choy RK. Addressing *Cryptosporidium* Infection among Young  
738 Children in Low-Income Settings: The Crucial Role of New and Existing Drugs for Reducing  
739 Morbidity and Mortality. *PLoS Negl Trop Dis*. 2016;10(1):e0004242. Epub 2016/01/29. doi:  
740 10.1371/journal.pntd.0004242. PubMed PMID: 26820408; PubMed Central PMCID:  
741 PMCPMC4731073.
- 742 13. Zhu G, Yin J, Cuny GD. Current status and challenges in drug discovery against the globally  
743 important zoonotic cryptosporidiosis. *Animal Diseases*. 2021;1(1):3. Epub 2021/04/23. doi:  
744 10.1186/s44149-021-00002-y.
- 745 14. Buckner FS, Ranade RM, Gillespie JR, Shibata S, Hulverson MA, Zhang Z, et al. Optimization of  
746 Methionyl tRNA-Synthetase Inhibitors for Treatment of *Cryptosporidium* Infection. *Antimicrob*  
747 *Agents Chemother*. 2019;63(4). Epub 20190327. doi: 10.1128/AAC.02061-18. PubMed PMID:  
748 30745384; PubMed Central PMCID: PMCPMC6437504.
- 749 15. Yang B, Wang D, Liu M, Wu X, Yin J, Zhu G. Host cells with transient overexpression of MDR1  
750 as a novel in vitro model for evaluating on-target effect for activity against the epicellular  
751 *Cryptosporidium* parasite. *J Antimicrob Chemother*. 2021;77(1):124-34. doi: 10.1093/jac/dkab369.  
752 PubMed PMID: 34648615.
- 753 16. Mollazadeh S, Sahebkar A, Hadizadeh F, Behravan J, Arabzadeh S. Structural and functional  
754 aspects of P-glycoprotein and its inhibitors. *Life Sci*. 2018;214:118-23. Epub 2018/11/20. doi:  
755 10.1016/j.lfs.2018.10.048. PubMed PMID: 30449449.
- 756 17. Sharom FJ. The P-glycoprotein multidrug transporter. *Essays Biochem*. 2011;50(1):161-78. Epub  
757 2011/10/05. doi: 10.1042/bse0500161. PubMed PMID: 21967057.
- 758 18. Schinkel AH, Jonker JW. Mammalian drug efflux transporters of the ATP binding cassette (ABC)  
759 family: an overview. *Adv Drug Deliv Rev*. 2003;55(1):3-29. Epub 2003/01/22. doi:  
760 10.1016/s0169-409x(02)00169-2. PubMed PMID: 12535572.
- 761 19. Dong X, Mumper RJ. Nanomedicinal strategies to treat multidrug-resistant tumors: current progress.  
762 *Nanomedicine (Lond)*. 2010;5(4):597-615. Epub 2010/06/10. doi: 10.2217/nnm.10.35. PubMed



- 763 PMID: 20528455; PubMed Central PMCID: PMCPMC2925023.
- 764 20. Chufan EE, Kapoor K, Ambudkar SV. Drug-protein hydrogen bonds govern the inhibition of the  
765 ATP hydrolysis of the multidrug transporter P-glycoprotein. *Biochem Pharmacol.* 2016;101:40-53.  
766 Epub 2015/12/22. doi: 10.1016/j.bcp.2015.12.007. PubMed PMID: 26686578; PubMed Central  
767 PMCID: PMCPMC4753104.
- 768 21. Akhtar N, Ahad A, Khar RK, Jaggi M, Aqil M, Iqbal Z, et al. The emerging role of P-glycoprotein  
769 inhibitors in drug delivery: a patent review. *Expert Opin Ther Pat.* 2011;21(4):561-76. Epub  
770 2011/03/19. doi: 10.1517/13543776.2011.561784. PubMed PMID: 21413912.
- 771 22. Robey RW, Pluchino KM, Hall MD, Fojo AT, Bates SE, Gottesman MM. Revisiting the role of  
772 ABC transporters in multidrug-resistant cancer. *Nat Rev Cancer.* 2018;18(7):452-64. Epub  
773 2018/04/13. doi: 10.1038/s41568-018-0005-8. PubMed PMID: 29643473; PubMed Central PMCID:  
774 PMCPMC6622180.
- 775 23. Samby K, Willis PA, Burrows JN, Laleu B, Webborn PJH. Actives from MMV Open Access  
776 Boxes? A suggested way forward. *PLoS Pathog.* 2021;17(4):e1009384. Epub 20210422. doi:  
777 10.1371/journal.ppat.1009384. PubMed PMID: 33886696; PubMed Central PMCID:  
778 PMCPMC8061869.
- 779 24. Kathawala RJ, Gupta P, Ashby CR, Jr., Chen ZS. The modulation of ABC transporter-mediated  
780 multidrug resistance in cancer: a review of the past decade. *Drug Resist Updat.* 2015;18:1-17. Epub  
781 2015/01/03. doi: 10.1016/j.drug.2014.11.002. PubMed PMID: 25554624.
- 782 25. Wu CP, Hsieh CH, Wu YS. The emergence of drug transporter-mediated multidrug resistance to  
783 cancer chemotherapy. *Mol Pharm.* 2011;8(6):1996-2011. Epub 2011/07/21. doi:  
784 10.1021/mp200261n. PubMed PMID: 21770407.
- 785 26. Hoffman PS, Sisson G, Croxen MA, Welch K, Harman WD, Cremades N, et al. Antiparasitic drug  
786 nitazoxanide inhibits the pyruvate oxidoreductases of *Helicobacter pylori*, selected anaerobic  
787 bacteria and parasites, and *Campylobacter jejuni*. *Antimicrob Agents Chemother.*  
788 2007;51(3):868-76. Epub 20061211. doi: 10.1128/AAC.01159-06. PubMed PMID: 17158936;  
789 PubMed Central PMCID: PMCPMC1803158.
- 790 27. Rotte C, Stejskal F, Zhu G, Keithly JS, Martin W. Pyruvate : NADP+ oxidoreductase from the  
791 mitochondrion of *Euglena gracilis* and from the apicomplexan *Cryptosporidium parvum*: a  
792 biochemical relic linking pyruvate metabolism in mitochondriate and amitochondriate protists. *Mol*  
793 *Biol Evol.* 2001;18(5):710-20. Epub 2001/04/25. doi: 10.1093/oxfordjournals.molbev.a003853.  
794 PubMed PMID: 11319255.
- 795 28. Arrowood MJ. *Cryptosporidium* Oocyst Purification Using Discontinuous Gradient Centrifugation.



- 796 Methods Mol Biol. 2020;2052:43-59. Epub 2019/08/28. doi: 10.1007/978-1-4939-9748-0\_4.  
797 PubMed PMID: 31452156.
- 798 29. Arrowood MJ, Donaldson K. Improved purification methods for calf-derived *Cryptosporidium*  
799 *parvum* oocysts using discontinuous sucrose and cesium chloride gradients. J Eukaryot Microbiol.  
800 1996;43(5):89S. Epub 1996/09/01. doi: 10.1111/j.1550-7408.1996.tb05015.x. PubMed PMID:  
801 8822880.
- 802 30. Arrowood MJ, Sterling CR. Isolation of *Cryptosporidium* oocysts and sporozoites using  
803 discontinuous sucrose and isopycnic Percoll gradients. J Parasitol. 1987;73(2):314-9. Epub  
804 1987/04/01. PubMed PMID: 3585626.
- 805 31. Zhang H, Zhu G. High-Throughput Screening of Drugs Against the Growth of *Cryptosporidium*  
806 *parvum* In Vitro by qRT-PCR. Methods Mol Biol. 2020;2052:319-34. Epub 2019/08/28. doi:  
807 10.1007/978-1-4939-9748-0\_18. PubMed PMID: 31452170.
- 808 32. Zhang H, Zhu G. Quantitative RT-PCR assay for high-throughput screening (HTS) of drugs against  
809 the growth of *Cryptosporidium parvum* in vitro. Front Microbiol. 2015;6:991. Epub 2015/10/07.  
810 doi: 10.3389/fmicb.2015.00991. PubMed PMID: 26441920; PubMed Central PMCID:  
811 PMC4585199.
- 812 33. Jin Z, Ma J, Zhu G, Zhang H. Discovery of Novel Anti-cryptosporidial Activities From Natural  
813 Products by in vitro High-Throughput Phenotypic Screening. Front Microbiol. 2019;10:1999. Epub  
814 2019/09/26. doi: 10.3389/fmicb.2019.01999. PubMed PMID: 31551955; PubMed Central PMCID:  
815 PMC6736568.
- 816 34. Guo F, Zhang H, McNair NN, Mead JR, Zhu G. The Existing Drug Vorinostat as a New Lead  
817 Against Cryptosporidiosis by Targeting the Parasite Histone Deacetylases. J Infect Dis.  
818 2018;217(7):1110-7. Epub 2018/01/05. doi: 10.1093/infdis/jix689. PubMed PMID: 29300993;  
819 PubMed Central PMCID: PMC5939870.
- 820 35. Oberbek A, Matasci M, Hacker DL, Wurm FM. Generation of stable, high-producing CHO cell  
821 lines by lentiviral vector-mediated gene transfer in serum-free suspension culture. Biotechnol  
822 Bioeng. 2011;108(3):600-10. Epub 2010/10/23. doi: 10.1002/bit.22968. PubMed PMID: 20967750.
- 823 36. Gottesman MM, Fojo T, Bates SE. Multidrug resistance in cancer: role of ATP-dependent  
824 transporters. Nat Rev Cancer. 2002;2(1):48-58. Epub 2002/03/21. doi: 10.1038/nrc706. PubMed  
825 PMID: 11902585.
- 826 37. Gottesman MM, Ling V. The molecular basis of multidrug resistance in cancer: the early years of  
827 P-glycoprotein research. FEBS Lett. 2006;580(4):998-1009. Epub 2006/01/13. doi:  
828 10.1016/j.febslet.2005.12.060. PubMed PMID: 16405967.

- 829 38. Chen KG, Sikic BI. Molecular pathways: regulation and therapeutic implications of multidrug  
830 resistance. *Clin Cancer Res.* 2012;18(7):1863-9. Epub 2012/02/22. doi:  
831 10.1158/1078-0432.CCR-11-1590. PubMed PMID: 22344233; PubMed Central PMCID:  
832 PMCPMC3359695.
- 833 39. Liu DL, Bu H, Li H, Chen H, Guo HC, Wang ZH, et al. Emodin reverses gemcitabine resistance in  
834 pancreatic cancer cells via the mitochondrial apoptosis pathway in vitro. *Int J Oncol.*  
835 2012;40(4):1049-57. Epub 2011/12/14. doi: 10.3892/ijo.2011.1285. PubMed PMID: 22159556;  
836 PubMed Central PMCID: PMCPMC3584653.
- 837 40. Wu ZX, Yang Y, Zeng L, Patel H, Bo L, Lin L, et al. Establishment and Characterization of an  
838 Irinotecan-Resistant Human Colon Cancer Cell Line. *Front Oncol.* 2020;10:624954. Epub  
839 2021/03/12. doi: 10.3389/fonc.2020.624954. PubMed PMID: 33692943; PubMed Central PMCID:  
840 PMCPMC7937870.
- 841 41. Takahashi K, Tanaka M, Inagaki A, Wanibuchi H, Izumi Y, Miura K, et al. Establishment of a  
842 5-fluorouracil-resistant triple-negative breast cancer cell line. *Int J Oncol.* 2013;43(6):1985-91.  
843 Epub 2013/10/16. doi: 10.3892/ijo.2013.2135. PubMed PMID: 24126575.
- 844 42. Sebaugh JL. Guidelines for accurate EC50/IC50 estimation. *Pharm Stat.* 2011;10(2):128-34. Epub  
845 2012/02/14. doi: 10.1002/pst.426. PubMed PMID: 22328315.  
846

## 847 **Figure Legends**

### 848 **Fig 1. A developing meront of the epicellular *Cryptosporidium parvum* residing on top of a** 849 **cultured host cell.**

850 The epicellular parasite embraced by a parasitophorous vacuole membrane (PVM) is directly  
851 exposed to the culture medium, but separated from the host cell cytoplasm by an electron-dense  
852 structure. A vertical line is for comparison drug exposure to the parasite grown on a wild-type  
853 (WT) or negative control (NC) host cell (on the left) and a transgenic host cell overexpressing  
854 *MDR1* (on the right). Blue dots illustrate a hypothetical compound under investigation.  
855 Overexpression of *MDR1* gene in the host cell would not affect the concentration of the  
856 compound in the culture medium (i.e.,  $[a] = [b]$ ). In WT/NC cells, there is a decrease in  
857 compound concentration in the cytoplasm due to the basal level of MDR1-mediated efflux (i.e.,  
858  $[a] = [b] > [c]$ ). In *MDR1*-overexpressing cells, there is a greater decrease in compound  
859 concentration in the cytoplasm due to the much higher level of MDR1-mediated efflux (i.e.,  $[a] =$   
860  $[b] > [c] \gg [d]$ ). The presence of a basal level of MDR1 also explains why the MDR1 inhibitor  
861 elacridar increased the cytotoxicity of some compounds to WT/NC cells as shown in Fig 8 and 9.

### 862 **Fig 2. Vectors for generating MDR1-transgenic HCT-8 cells and confirmation of the** 863 **overexpression of *MDR1* transcript and MDR1 protein in *MDR1*-transgenic cells.**

864 (A) Illustration of the negative control blank vector (pCDH-NC) containing a copGFP driven by  
865 *EF1 $\alpha$*  promoter and its derived vector carrying the whole *MDR1* open reading frame (cDNA  
866 reverse-transcribed from mRNA) driven by MCV promoter (pCDH-MDR1). *EcoRI* and *BamHI*  
867 refer to the restriction sites for the insertion of *MDR1* cDNA fragment. (B) Western blots of  
868 MDR1 protein in HCT-8/NC and HCT-8/MDR1 cells (labeled as NC and MDR1, respectively).  
869 GAPDH was used as an interval control. A set of representative blots is shown here. (C) Fold  
870 change of MDR1 protein levels between MDR1 and NC cells as measured from the western  
871 blots and normalized with GAPDH ( $n = 3$ ). (D) Fold change of *MDR1* mRNA between MDR1  
872 and NC cells as determined by qRT-PCR and normalized with *GAPDH* ( $n = 3$ ). In panels B, C  
873 and D, cells were continuous cultured for 0, 1, 3 and 5 days to confirm that consistency of  
874 *MDR1*-overexpression in *MDR1*-transgenic cells. (E) Western blots of MDR1 protein in NC and  
875 MDR1 cells in comparison with those after drug selections by paclitaxel (labeled as NC(PTX))

876 and MDR1(PTX)) or nitazoxanide (labeled as NC(NTZ) and MDR1(NTZ)) ( $n = 3$ ). (F) Fold  
877 change of MDR1 protein in *MDR1*-overexpressing cells in comparison with corresponding NC  
878 cells [i.e., MDR1 vs. NC, MDR1(PTX) vs. NC(PTX) and MDR1(NTZ) vs. NC(NTZ)] as  
879 measured from the western blots and normalized with GAPDH ( $n = 3$ ). (G) Fold change of  
880 *MDR1* mRNA in *MDR1*-overexpressing cells in comparison with corresponding NC cells [i.e.,  
881 MDR1 vs. NC, MDR1(PTX) vs. NC(PTX) and MDR1(NTZ) vs. NC(NTZ)] as determined by  
882 qRT-PCR and normalized with GAPDH ( $n = 3$ ). Panels E, F and G show that drug selections by  
883 PTX and NTZ had no or little effect on the expression of *MDR1* at both mRNA and protein  
884 levels. Bars represent the standard errors of the means (SEMs;  $n = 3$ ). Statistical significances  
885 were determined by Holm-Šídák multiple *t*-test between group pairs (\*\*\*\* =  $p < 0.0001$ ).

886 **Fig 3. Effects overexpressing MDR1 and drug selection by paclitaxel (PTX) or nitazoxanide**  
887 **(NTZ) on the tolerance of cells to PTX or NTZ as determined by MTS cytotoxicity assay.**

888 (A, B) Inhibition of PTX (A) or NTZ (B) on the growth of the wild-type, blank vector negative  
889 control and MDR1-transgenic HCT-8 cells (labeled as WT, NC and MDR1, respectively). (C, D)  
890 Inhibition of PTX (C) or NTZ (D) on the growth of WT, NC and MDR1 cells that were  
891 subjected to the selection by PTX [labeled as WT(PTX), NC(PTX) and MDR1(PTX),  
892 respectively]. (E, F) Inhibition of PTX (F) or NTZ (E) on the growth of WT, NC and MDR1  
893 cells subjected to the selection by NTZ [labeled as WT(NTZ), NC(NTZ) and MDR1(NTZ),  
894 respectively]. Also see Table 1 for more detailed descriptions about the cell lines.  $TC_{50} = 50\%$   
895 cytotoxicity values. Bars represent the standard errors of the means (SEMs;  $n = 3$ ). Statistical  
896 significances between curves were determined by two-way ANOVA with *p*-values shown in  
897 brown fonts. Statistical significances between individual data points (i.e., MDR1, MDR1(PTX)  
898 or MDR1(NTZ) cells vs. corresponding NC, NC(PTX) and NC(NTZ) cells, respectively) were  
899 determined by Holm-Šídák multiple *t*-test between group pairs (\* =  $p < 0.05$ , \*\* =  $p < 0.01$ , \*\*\* =  
900  $p < 0.001$  and \*\*\*\* =  $p < 0.0001$ ). There are no statistical significances between WT and NC,  
901 WT(PTX) and NC(PTX), as well as WT(NTZ) and NC(NTZ) cells in both two-way ANOVA  
902 and multiple *t*-tests.

903 **Fig 4. Morphology of HCT-8/NC, HCT-8/MDR1, HCT-8/NC(PTX), HCT-8/MDR1(PTX),**  
904 **HCT-8/NC(PTX), HCT-8/MDR1(PTX) cells.**

905 Cells were cultured for 24 h until near confluence, showing that overexpression of *MDR1* and  
906 drug selections by paclitaxel (PTX) or nitazoxanide (NTZ) had no apparent effect on the  
907 morphology and growth of host cells. See [Table 1](#) for more detailed descriptions about the cell  
908 lines. DIC, differential interference contrast microscopy; DAPI, 4',6-diamidino-2-phenylindole  
909 for counterstaining nuclei; copGFP, copepod green fluorescence protein present in both blank  
910 control and *MDR1*-carrying vector; MDR1, multidrug resistance protein-1 protein labeled by  
911 immunostaining.

912 **Fig 5. Effect of MDR1-overexpression and drug selection with paclitaxel (PTX) and**  
913 **nitazoxanide (NTZ) in host cells on the infection of *Cryptosporidium parvum* in vitro.**

914 (A) Relative loads of *C. parvum* grown on the nine host cell lines as determined by 44-h  
915 infection assay followed by qRT-PCR detection of the parasite 18S rRNA (Cp18S). The relative  
916 levels of Cp18S were normalized with host cell 18S rRNA (Hs18S) and expressed as the percent  
917 levels using that from WT cells as the baseline. The data showed that overexpression of MDR1  
918 and selection by PTX or NTZ had no or little effect on the parasite infection. Bars represent the  
919 standard errors of the means (SEMs;  $n = 3$ ). (B) Immunostaining of MDR1 in the three  
920 MDR1-overexpressing host cell lines that were infected with *C. parvum* for 24 h, showing no  
921 particular accumulation of MDR1 protein at the infection sites.

922 **Fig 6. Evaluation of the on/off-target effects of the six inhibitors under investigation based**  
923 **on anti-cryptosporidial efficacy and cytotoxicity curves and 50% inhibition values.**

924 (A – E) Efficacy and cytotoxicity of paclitaxel (A), ivermectin (B), vincristine (C), doxorubicin  
925 (D) and mitoxantrone (E) using MDR1(PTX) cell model (vs. WT and NC cells). (F) Efficacy and  
926 cytotoxicity of nitazoxanide using MDR1(NTZ) cell model (vs. WT and NC cells). In all panels,  
927 there were no or little differences on the efficacy or cytotoxicity curves between WT and NC  
928 cells. Increased drug tolerance (i.e., reduced cytotoxicity) to paclitaxel (A) or nitazoxanide (F) in  
929 host cells had no effect on the anti-cryptosporidial efficacy, while increased drug tolerance  
930 (reduced cytotoxicity) to ivermectin (B), vincristine (C), doxorubicin (D) and mitoxantrone (E)  
931 in host cells reduced the anti-cryptosporidial efficacy. Bars represent the standard errors of the  
932 means (SEMs;  $n = 3$ ).

933 **Fig 7. Effects of the MDR1 inhibitor elacridar (300 nM) on the growth of the six host cell**

934 **lines including NC, MDR1, NC(PTX), MDR1(PTX), NC(NTZ) and MDR1(NTZ) cells (A)**  
935 **and on the growth of *Cryptosporidium parvum* cultured with NC, MDR1(PTX) and**  
936 **MDR1(NTZ) cells (B).**

937 The host cell growth was determined by MTS cytotoxicity assay. The parasite growth was  
938 determined by 44-h infection/qRT-PCR assay. See [Table 1](#) for more detailed descriptions about  
939 the cell lines. Bars represent the standard errors of the means (SEMs;  $n = 3$ ). There was no  
940 statistical significances between each pair of specimens (i.e., 300 nM vs. 0 nM elacridar) by  
941 Holm-Šídák multiple  $t$ -test.

942 **Fig 8. Effect of MDR1-inhibition by elacridar (300 nM) on the cytotoxicity and**  
943 **anti-cryptosporidial activity of the five inhibitors under investigation using MDR(PTX) cell**  
944 **model.**

945 (A) Effect of elacridar on the cytotoxicity of the five inhibitors on NC and MDR1 cells. (B)  
946 Effect of elacridar on the cytotoxicity of the five inhibitors on NC(PTX) and MDR1(PTX) cells.  
947 (C) Effect of elacridar on the anti-cryptosporidial activity of the five inhibitors against  
948 *Cryptosporidium parvum* cultured on NC and MDR1(PTX) cells. Cytotoxicity of inhibitors at  
949 specified concentrations on the host cells was evaluated by MTS cytotoxicity assay.  
950 Anti-cryptosporidial activity of inhibitors at specified concentrations was determined by 44-h  
951 infection/qRT-PCR assay. PTX, paclitaxel; MXT, mitoxantrone; DXR, doxorubicin; VCT,  
952 vincristine; IVM, ivermectin. Bars represent the standard errors of the means (SEMs;  $n = 3$ ).  
953 Statistical significances were evaluated by Holm-Šídák multiple  $t$ -test between group pairs (\*\* =  
954  $p < 0.01$ , \*\*\* =  $p < 0.001$  and \*\*\*\* =  $p < 0.0001$ ).

955 **Fig 9. Effect of MDR1-inhibition by elacridar (300 nM) on the cytotoxicity and**  
956 **anti-cryptosporidial activity of nitazoxanide (NTZ) using MDR(NTZ) cell model.**

957 (A) Effect of elacridar on the cytotoxicity of NTZ on NC(NTZ) and MDR1(NTZ) cells. (B)  
958 Effect of elacridar on the anti-cryptosporidial activity of NTZ against *Cryptosporidium parvum*  
959 cultured on NC and MDR1(NTZ) cells. Bars represent the standard errors of the means (SEMs;  $n$   
960 = 3). Statistical significances were evaluated by Holm-Šídák multiple  $t$ -test between group pairs  
961 (\*\* =  $p < 0.01$ ).

962 **Fig 10. Percent contributions (rates) of on-target and off-target effects to the observed**

963 **anti-cryptosporidial activity of paclitaxel (PTX), ivermectin (IVM), vincristine (VCT),**  
964 **doxorubicin (DXR), mitoxantrone (MXT) and nitazoxanide (NTZ) across the range of**  
965 **anti-cryptosporidial efficacy.**

966 The on-target ( $E_{\text{on}}$ ) or off-target ( $E_{\text{off}}$ ) rate refers to the percent contribution of the action of a  
967 specified inhibitor on the parasite target or on the host cell target to the observed  
968 anti-cryptosporidial activity as calculated using Eq. 3 and 4. Parameters (i.e.,  $EC_{50}$ ,  $TC_{50}$  and Hill  
969 slope  $h$ ) were obtained by nonlinear regressions of the same datasets for plotting the cytotoxicity  
970 and efficacy curves in Fig 6. The  $E_{50(\text{on})}$  and  $E_{50(\text{off})}$  values shown in each plot refer to the  
971 on-target and off-target rates of a specified inhibitor at the  $EC_{50}$  concentration.

972 **Fig 11. Relationships between safety interval ( $SI$  or  $k$ ), on-target rate ( $E_{50(\text{on})}$ ) and Hill slope**  
973 **( $h$ ).**

974 (A) Plot of the on-target rate at  $EC_{50}$  ( $E_{50(\text{on})}$ ) against the safety interval ( $SI$ ) of the six inhibitors  
975 under investigation in wild-type (WT) cells. (B) Plot of the cytotoxicity for the six inhibitors  
976 under investigation (as percent inhibition on the growth of WT host cells) against the  
977 anti-cryptosporidial efficacy (as percent inhibition on the growth of *Cryptosporidium parvum*)  
978 cultured with WT cells. The data showed the effect of parameters  $k$  and  $h$  on the curve shapes.  
979 (C, D) Plots of theoretical cytotoxicity in percent values and safety intervals ( $SI$  or  $k$ ; values  
980 between 1 to 100) for curves with varied Hill slope values ( $h = 0.8$  to  $2.0$ ) at two representative  
981 antiparasitic efficacy values, i.e., at  $EC_{90}$  (C) and  $EC_{50}$  (D). The data showed the effect of  
982 parameter  $h$  on the curve shapes.



Compound concentrations:  $[a] = [b] > [c] \gg [d]$

HCT-8/WT or NC cells  
(basal level *MDR1*)

HCT-8/MDR1 cells  
(over-expressed *MDR1*)

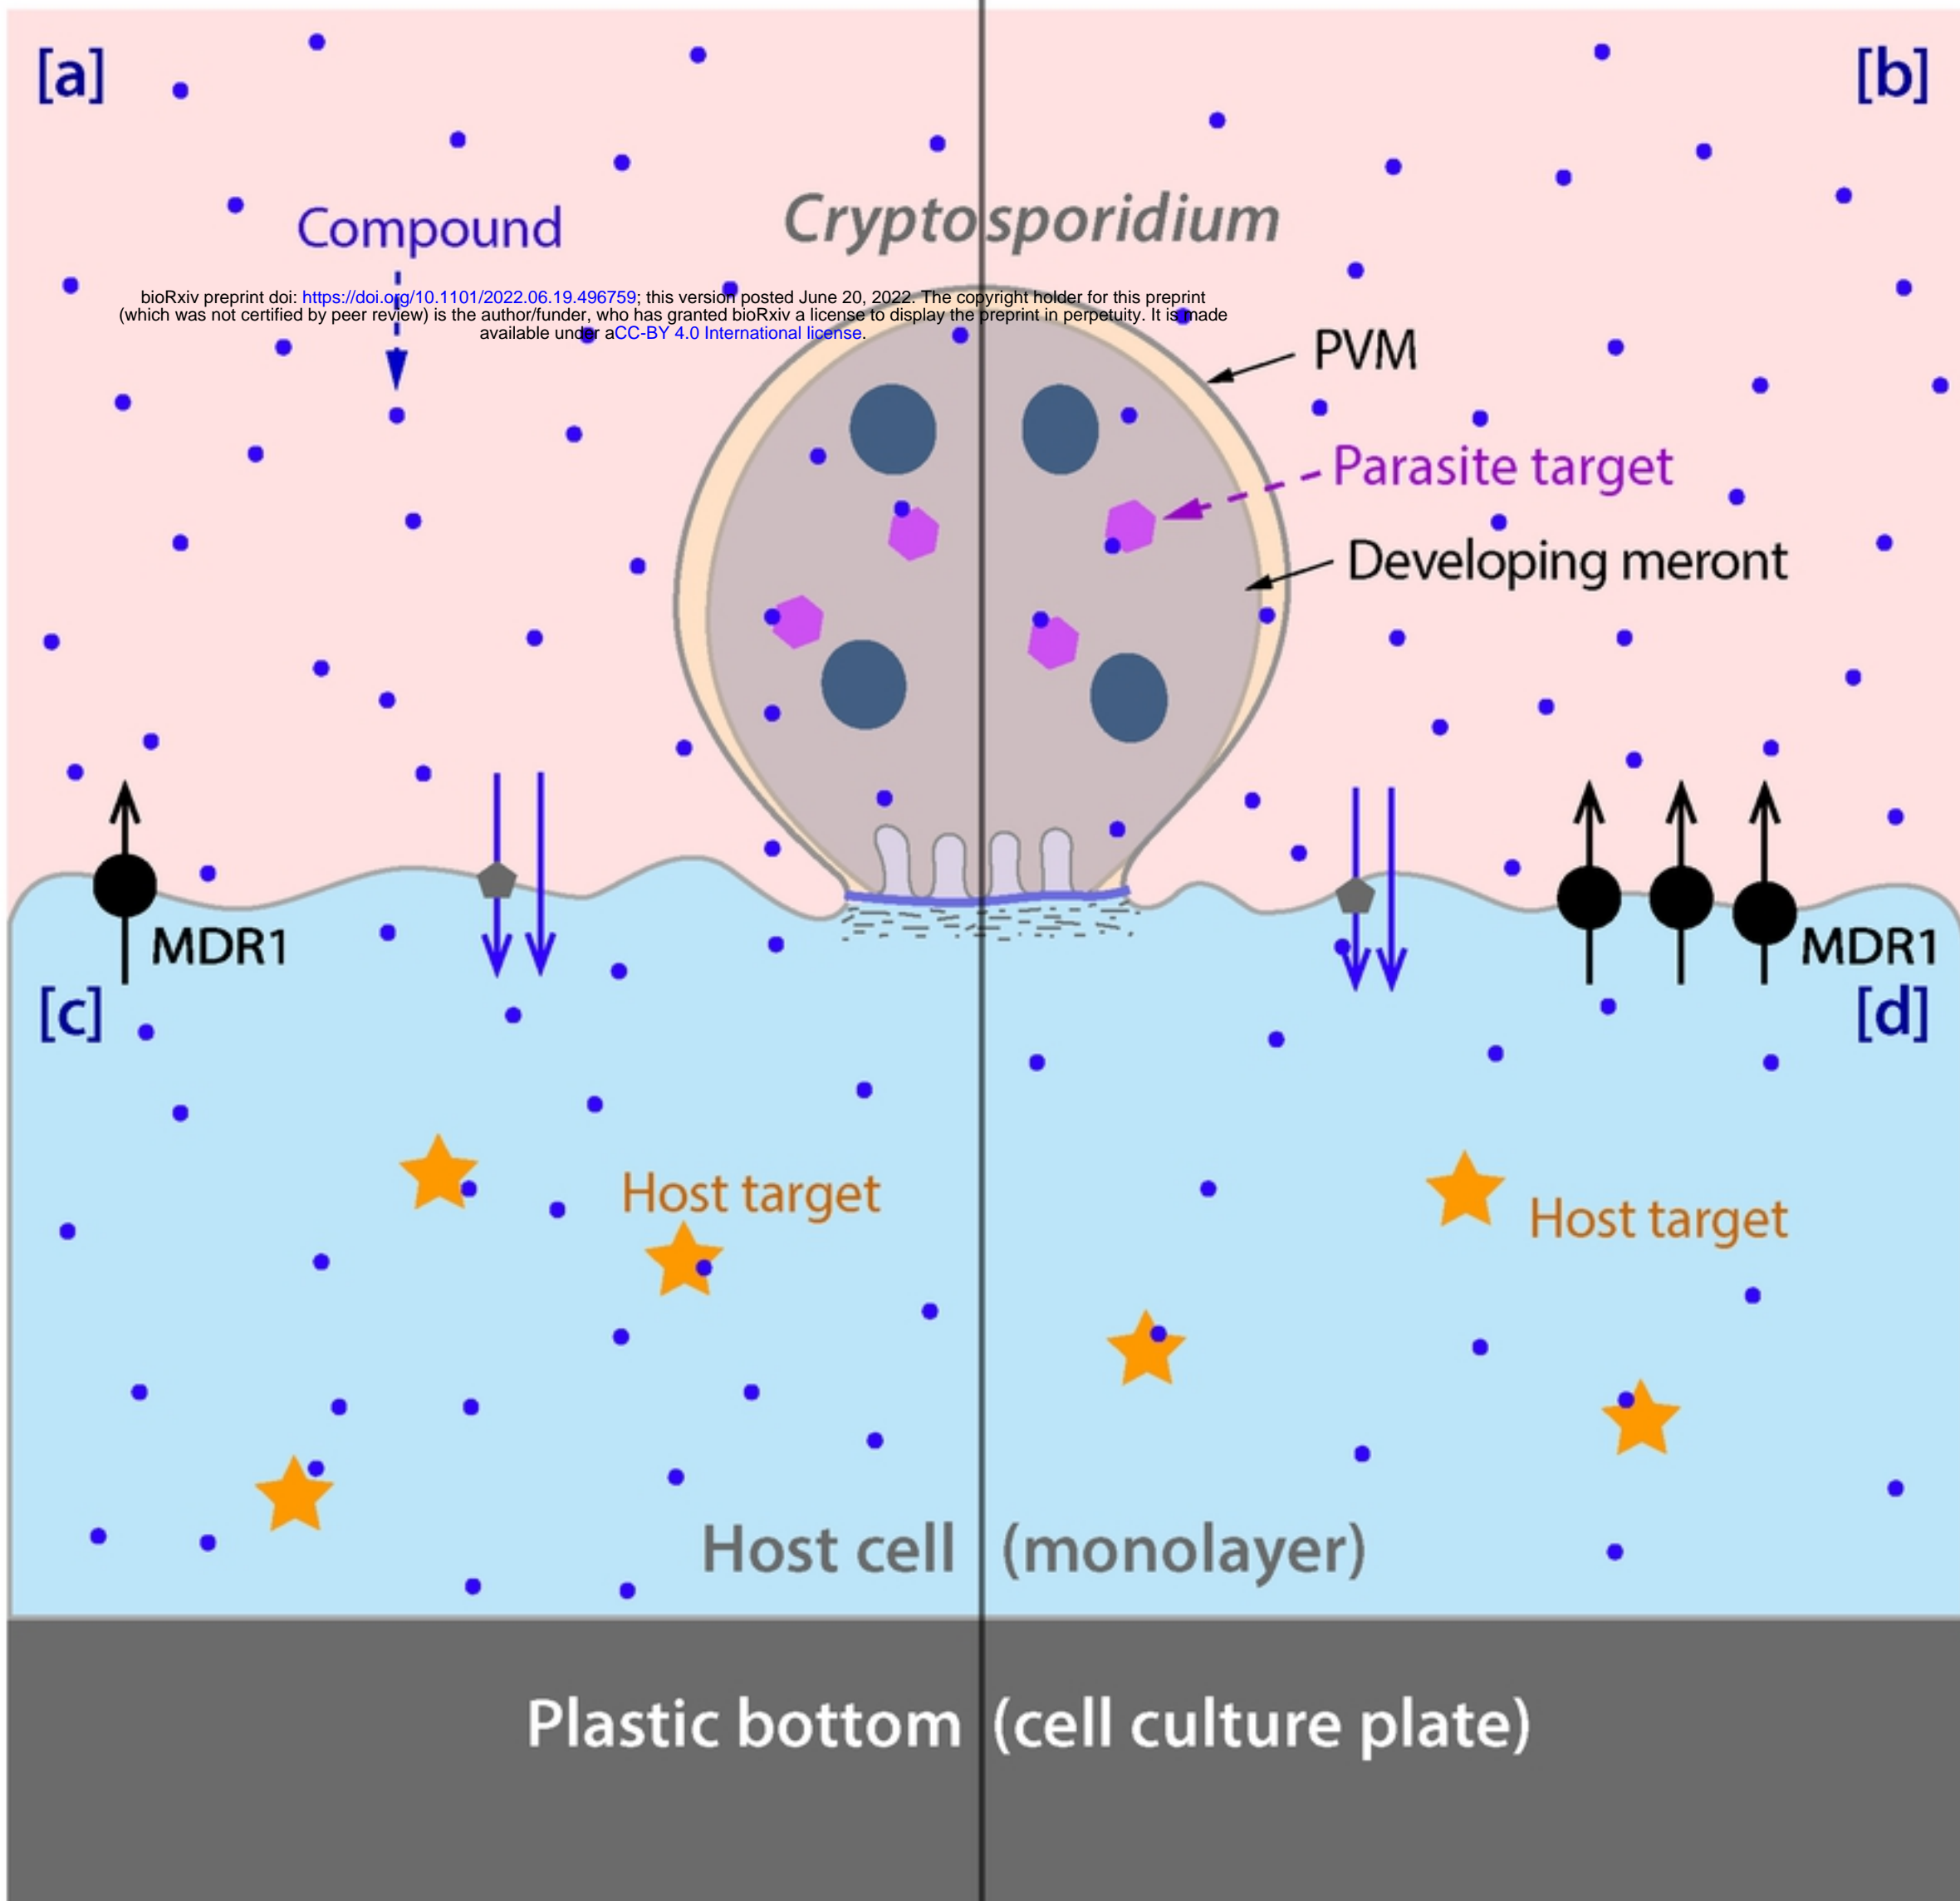

Figure 1



Host cells with no drug selection

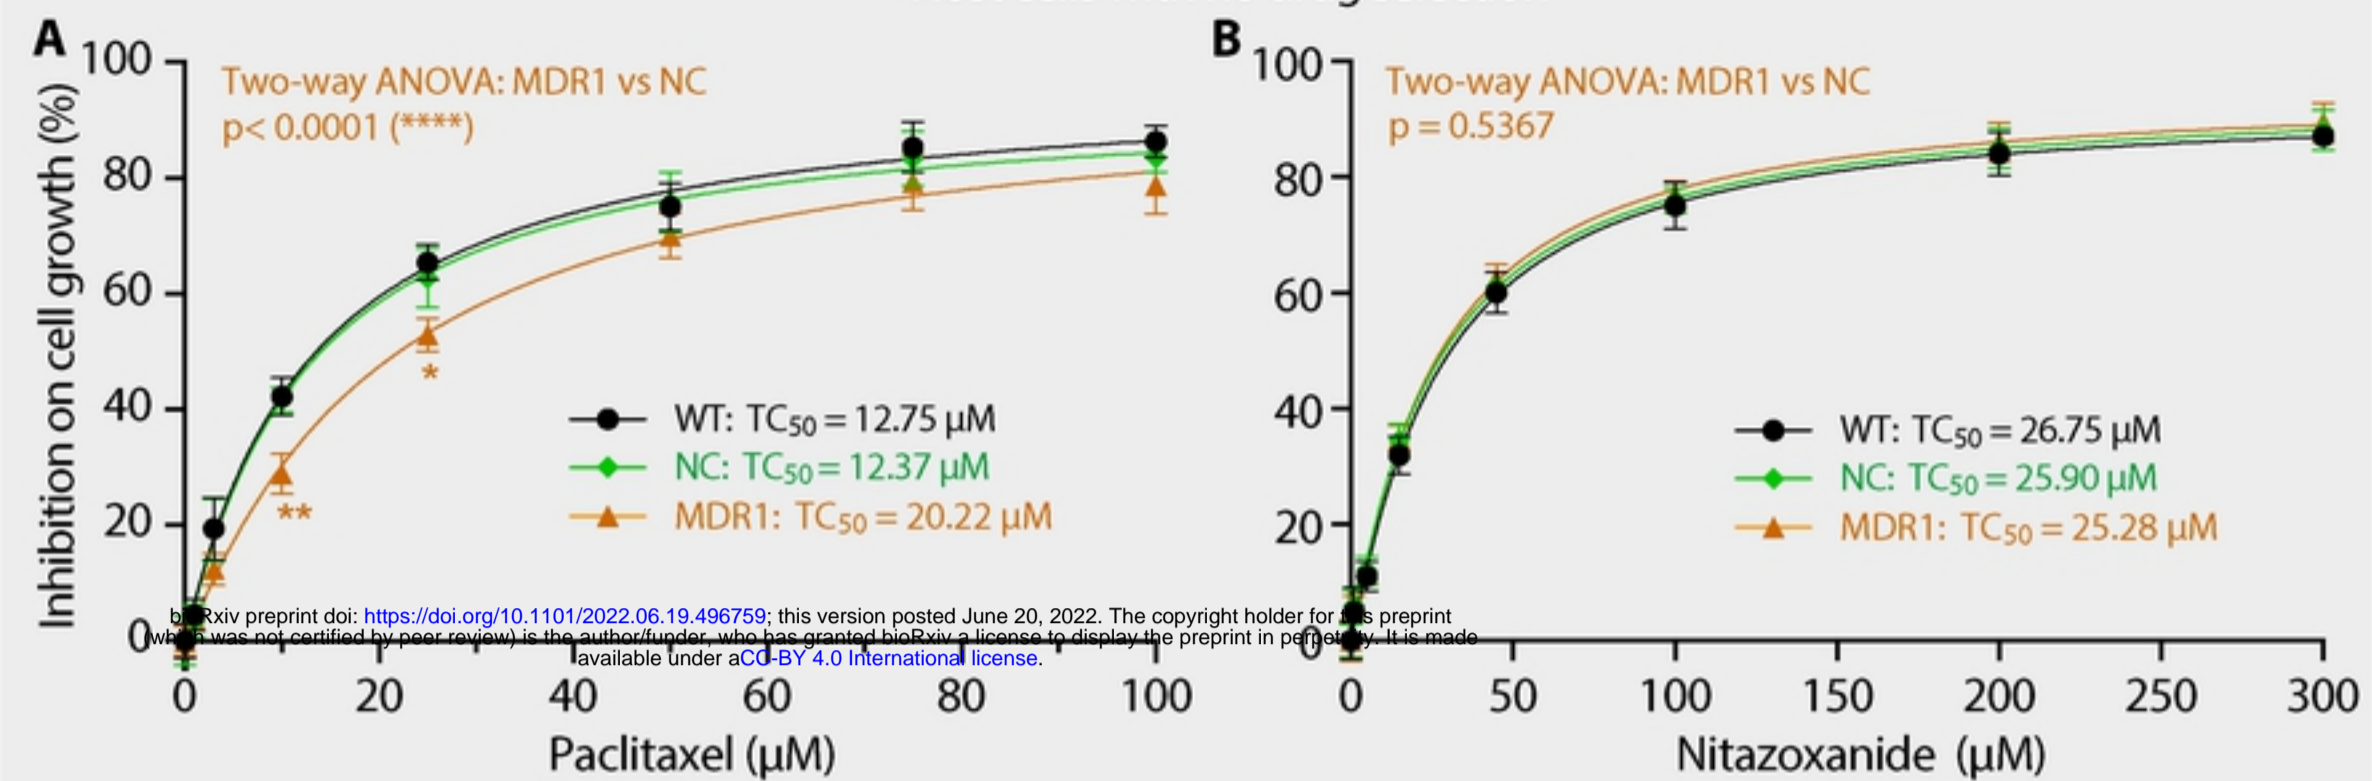

Host cells with selection by paclitaxel (PTX)

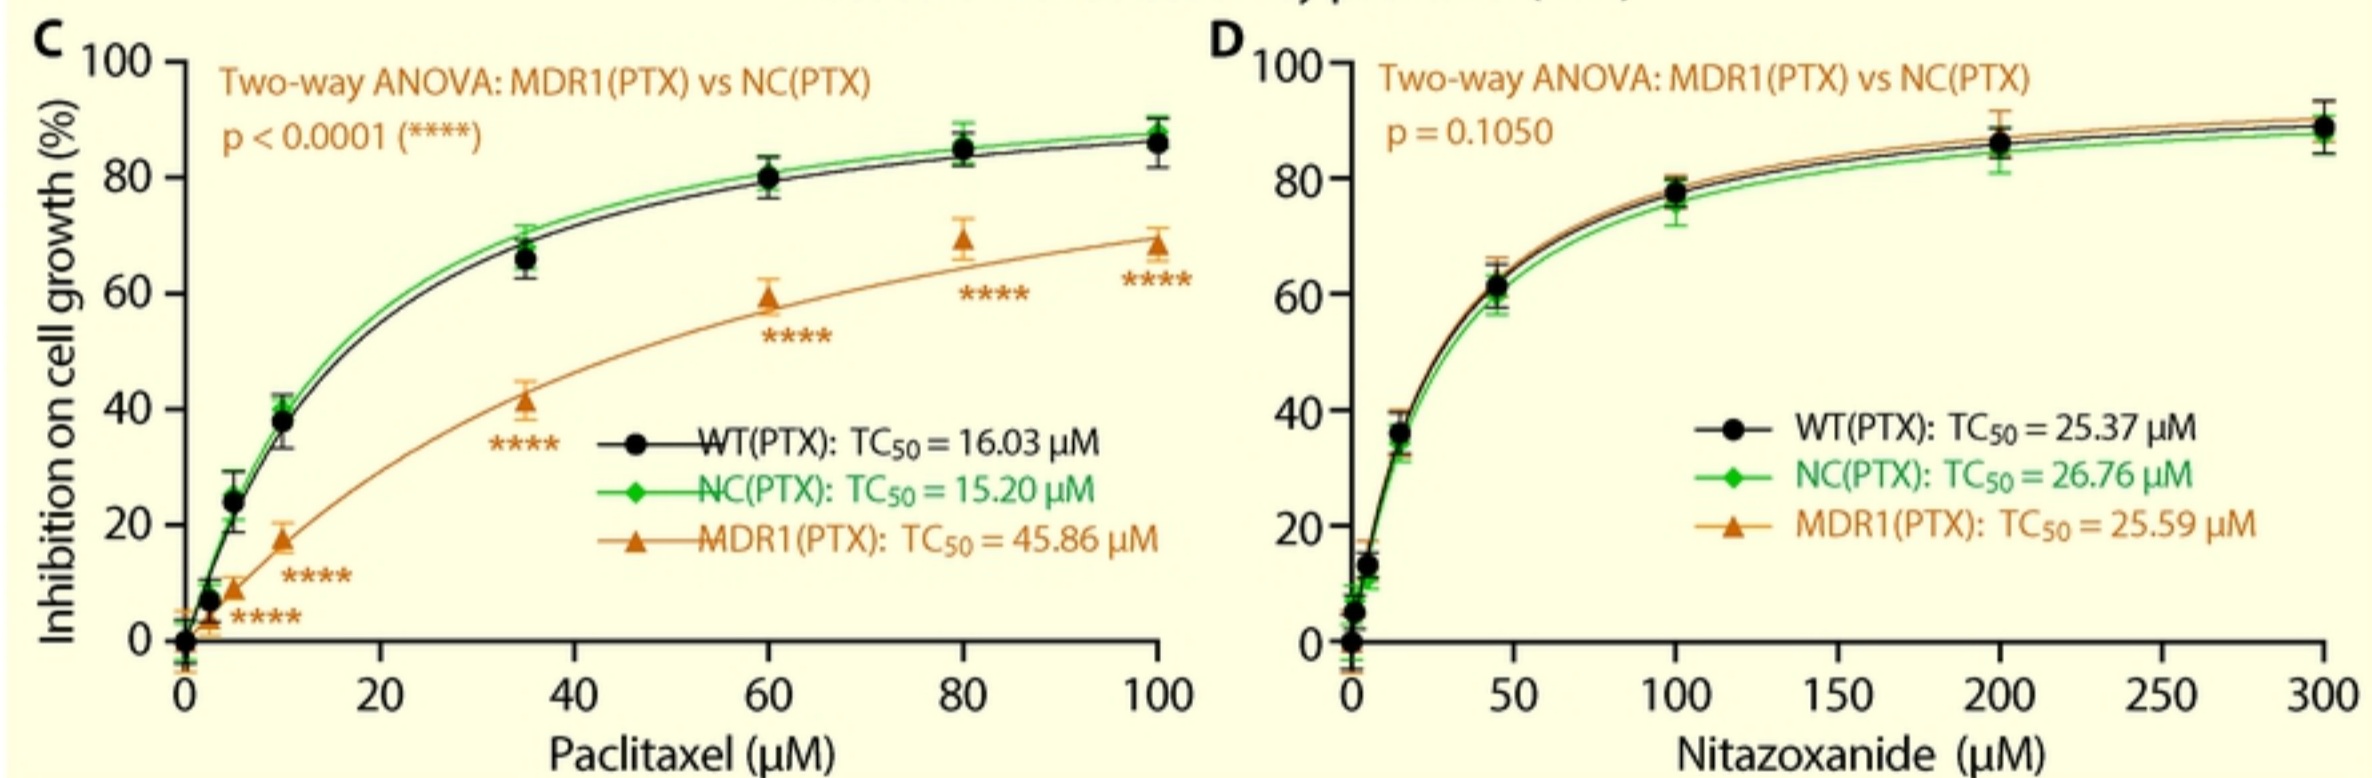

Host cells with selection by nitazoxanide (NTZ)

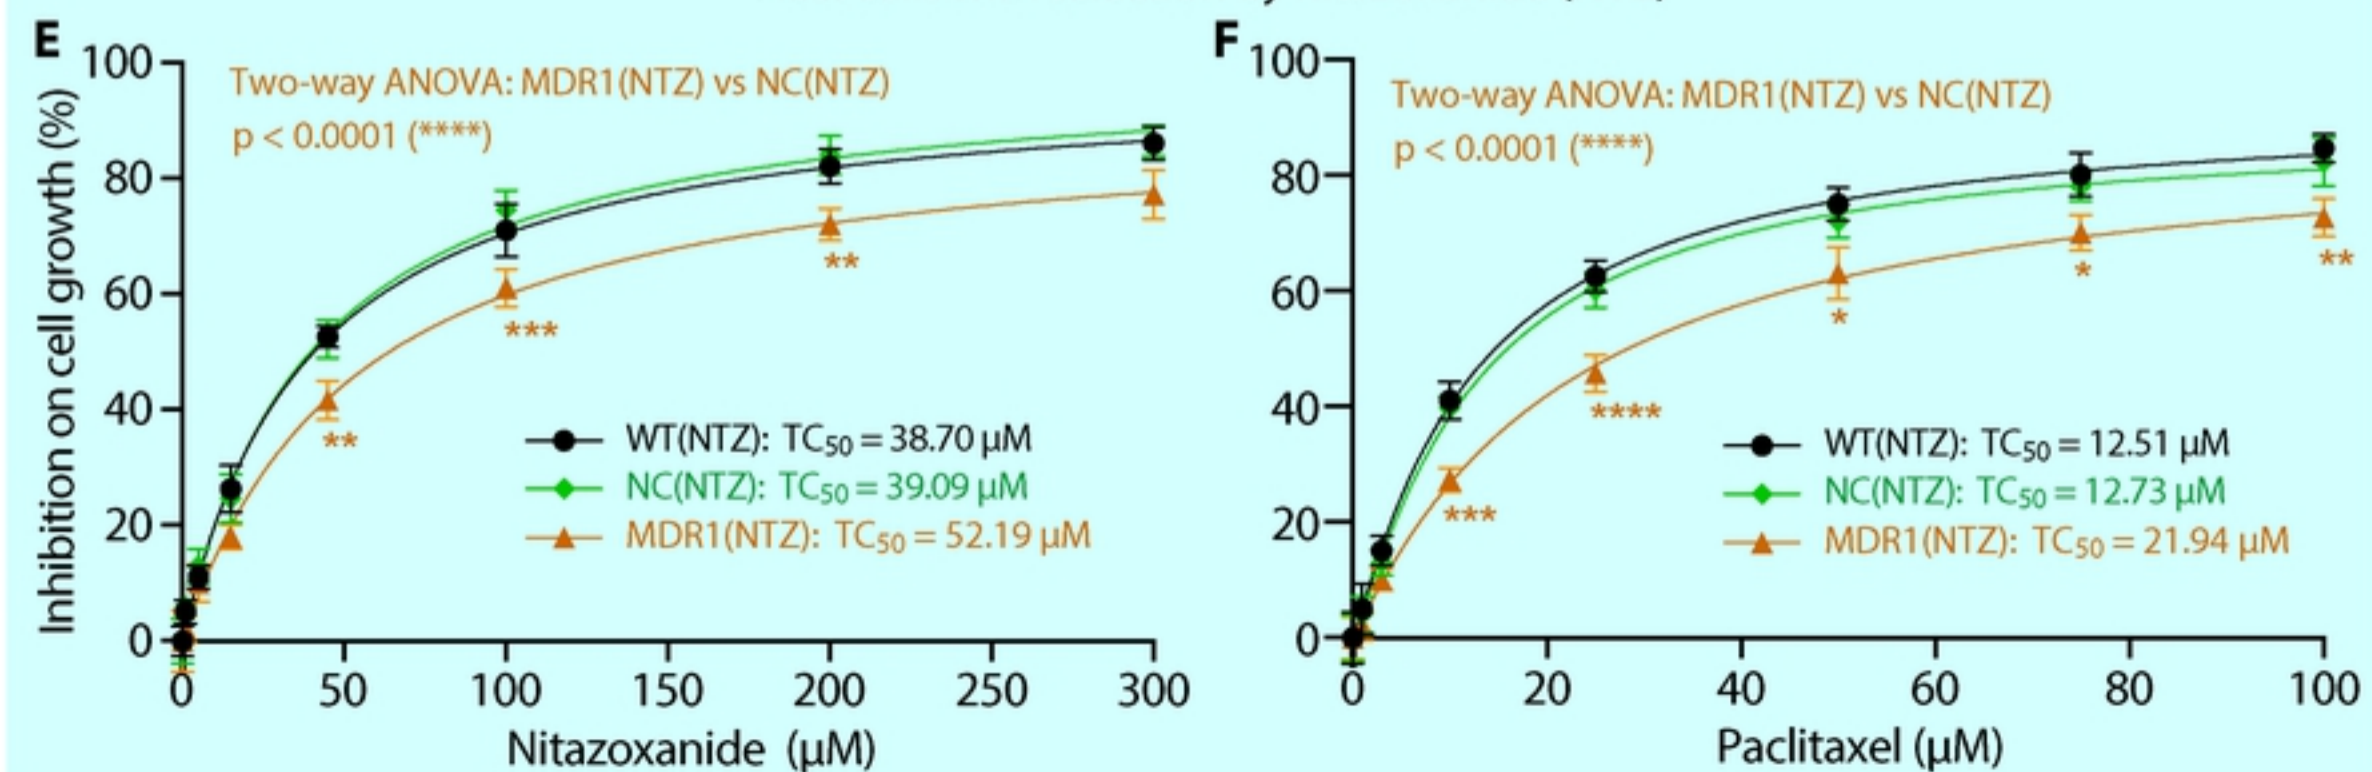

Figure 3

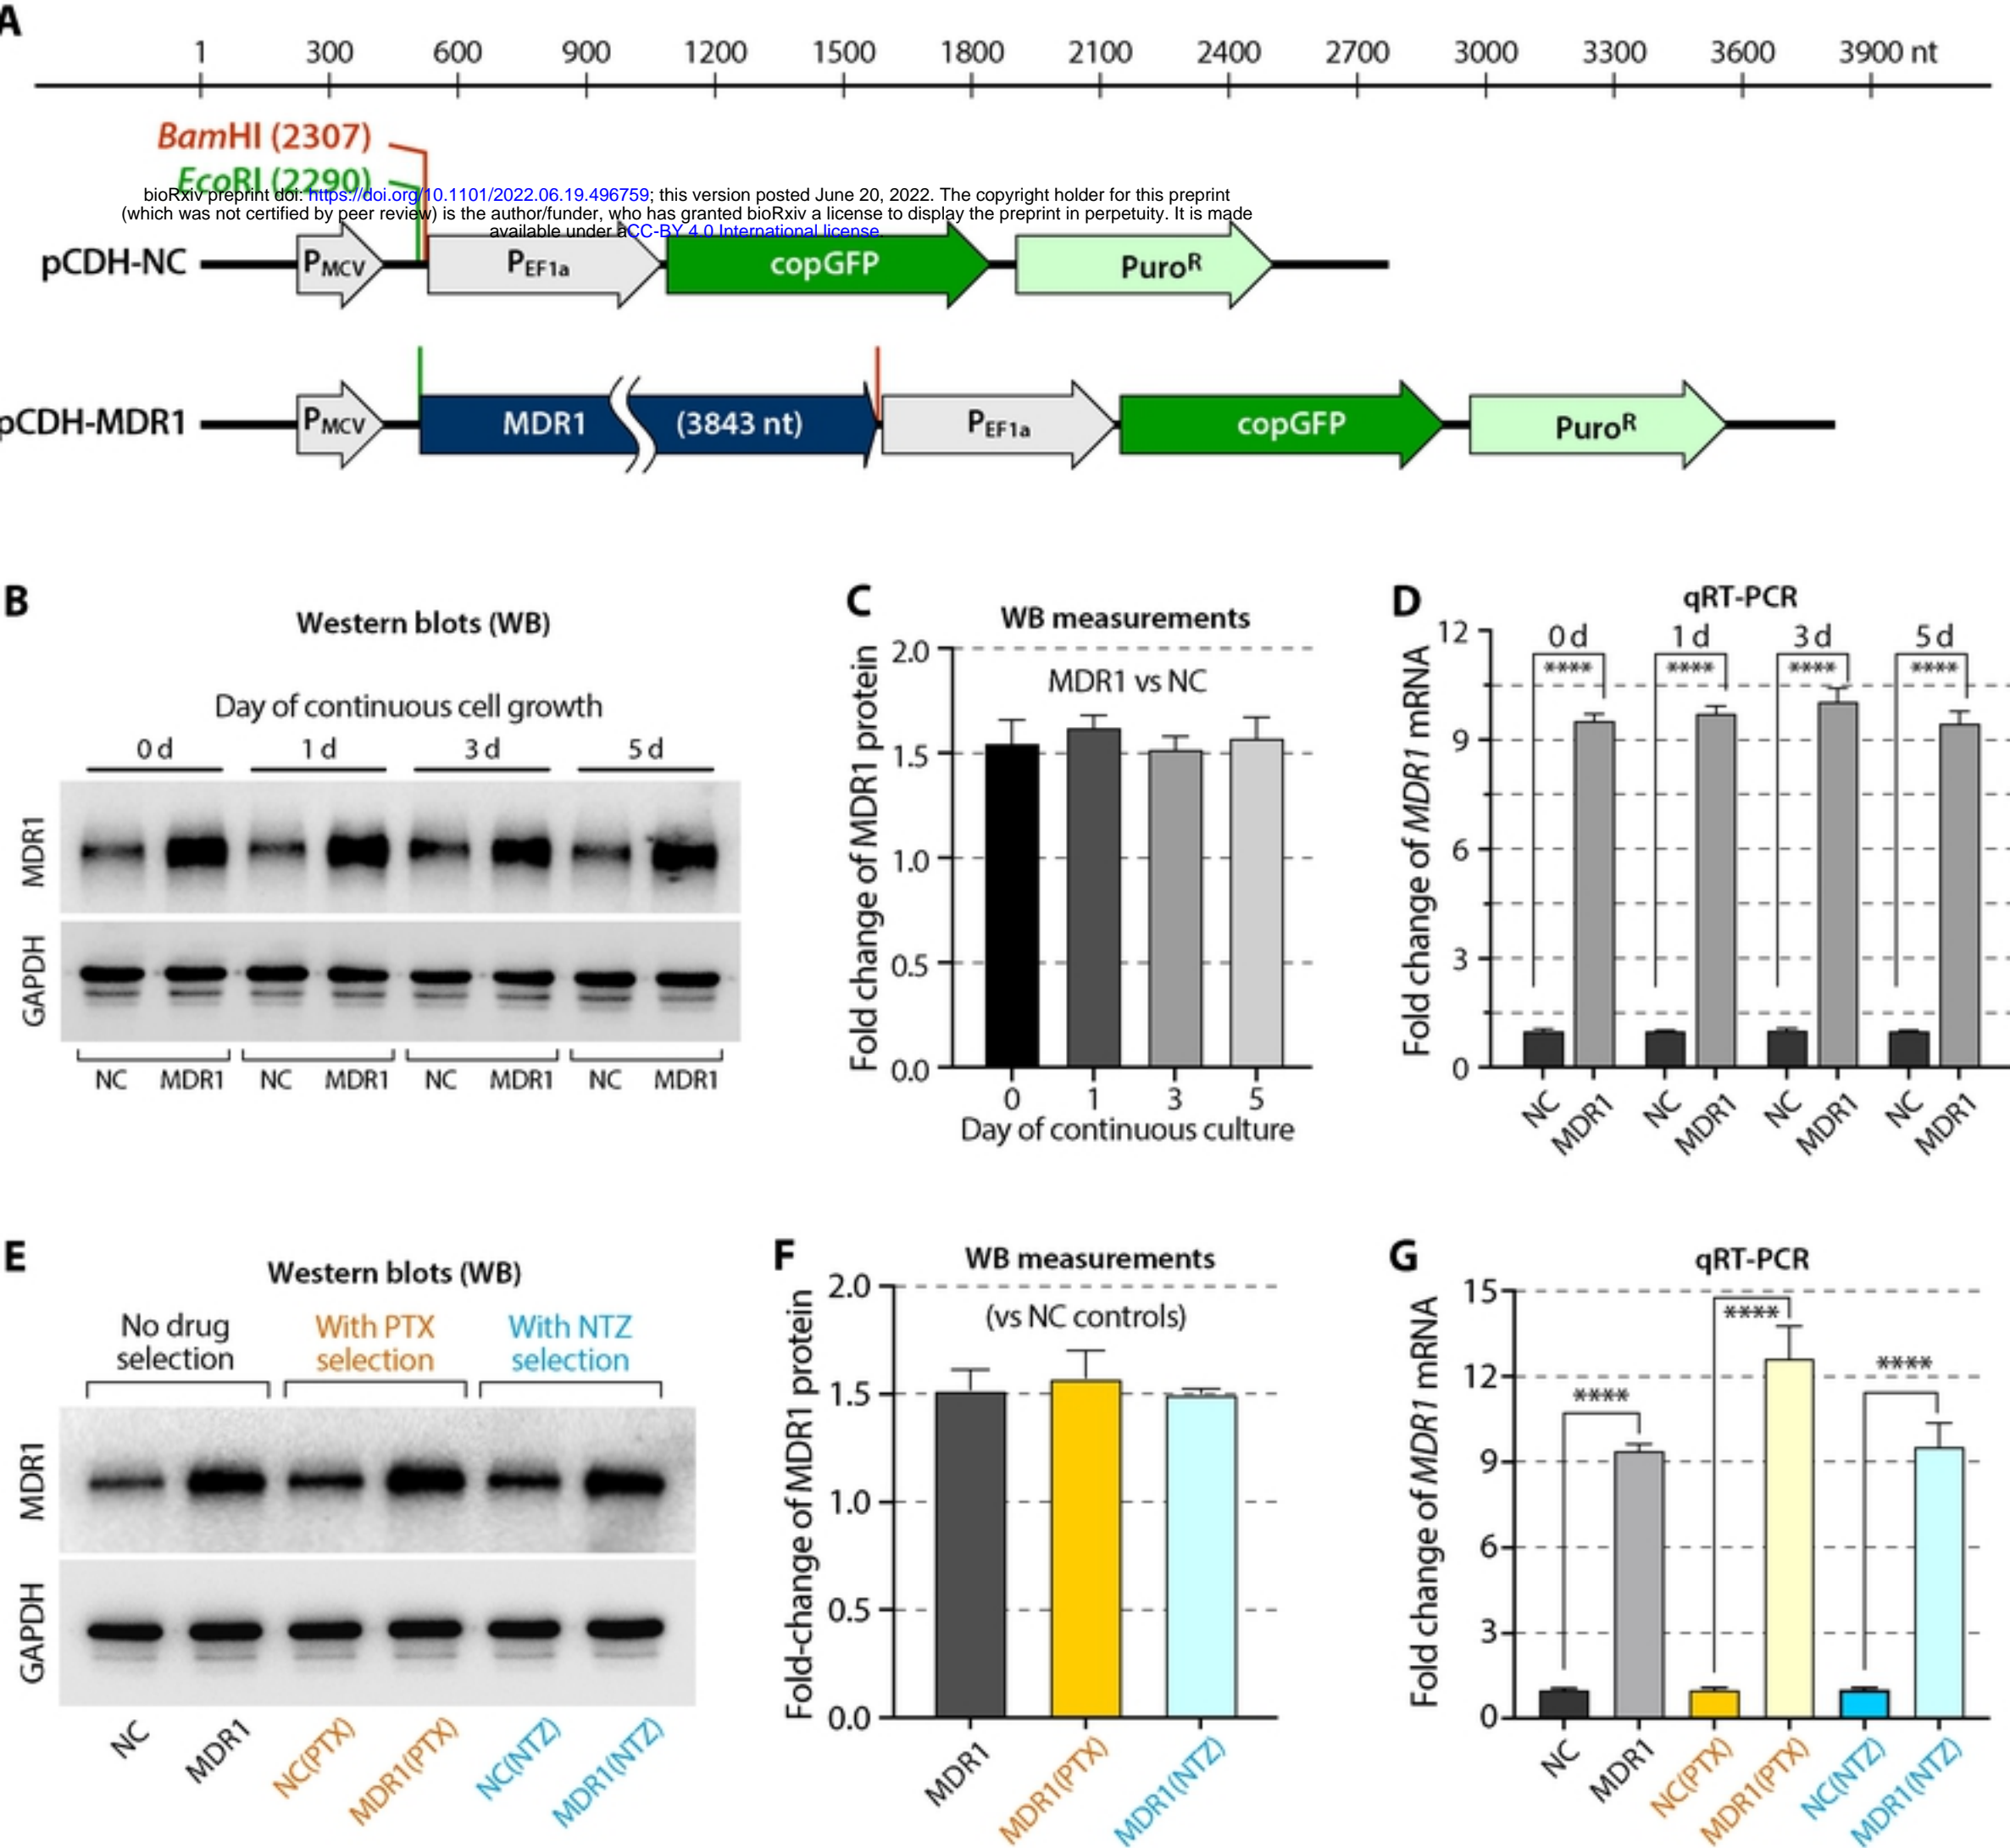

Figure 2



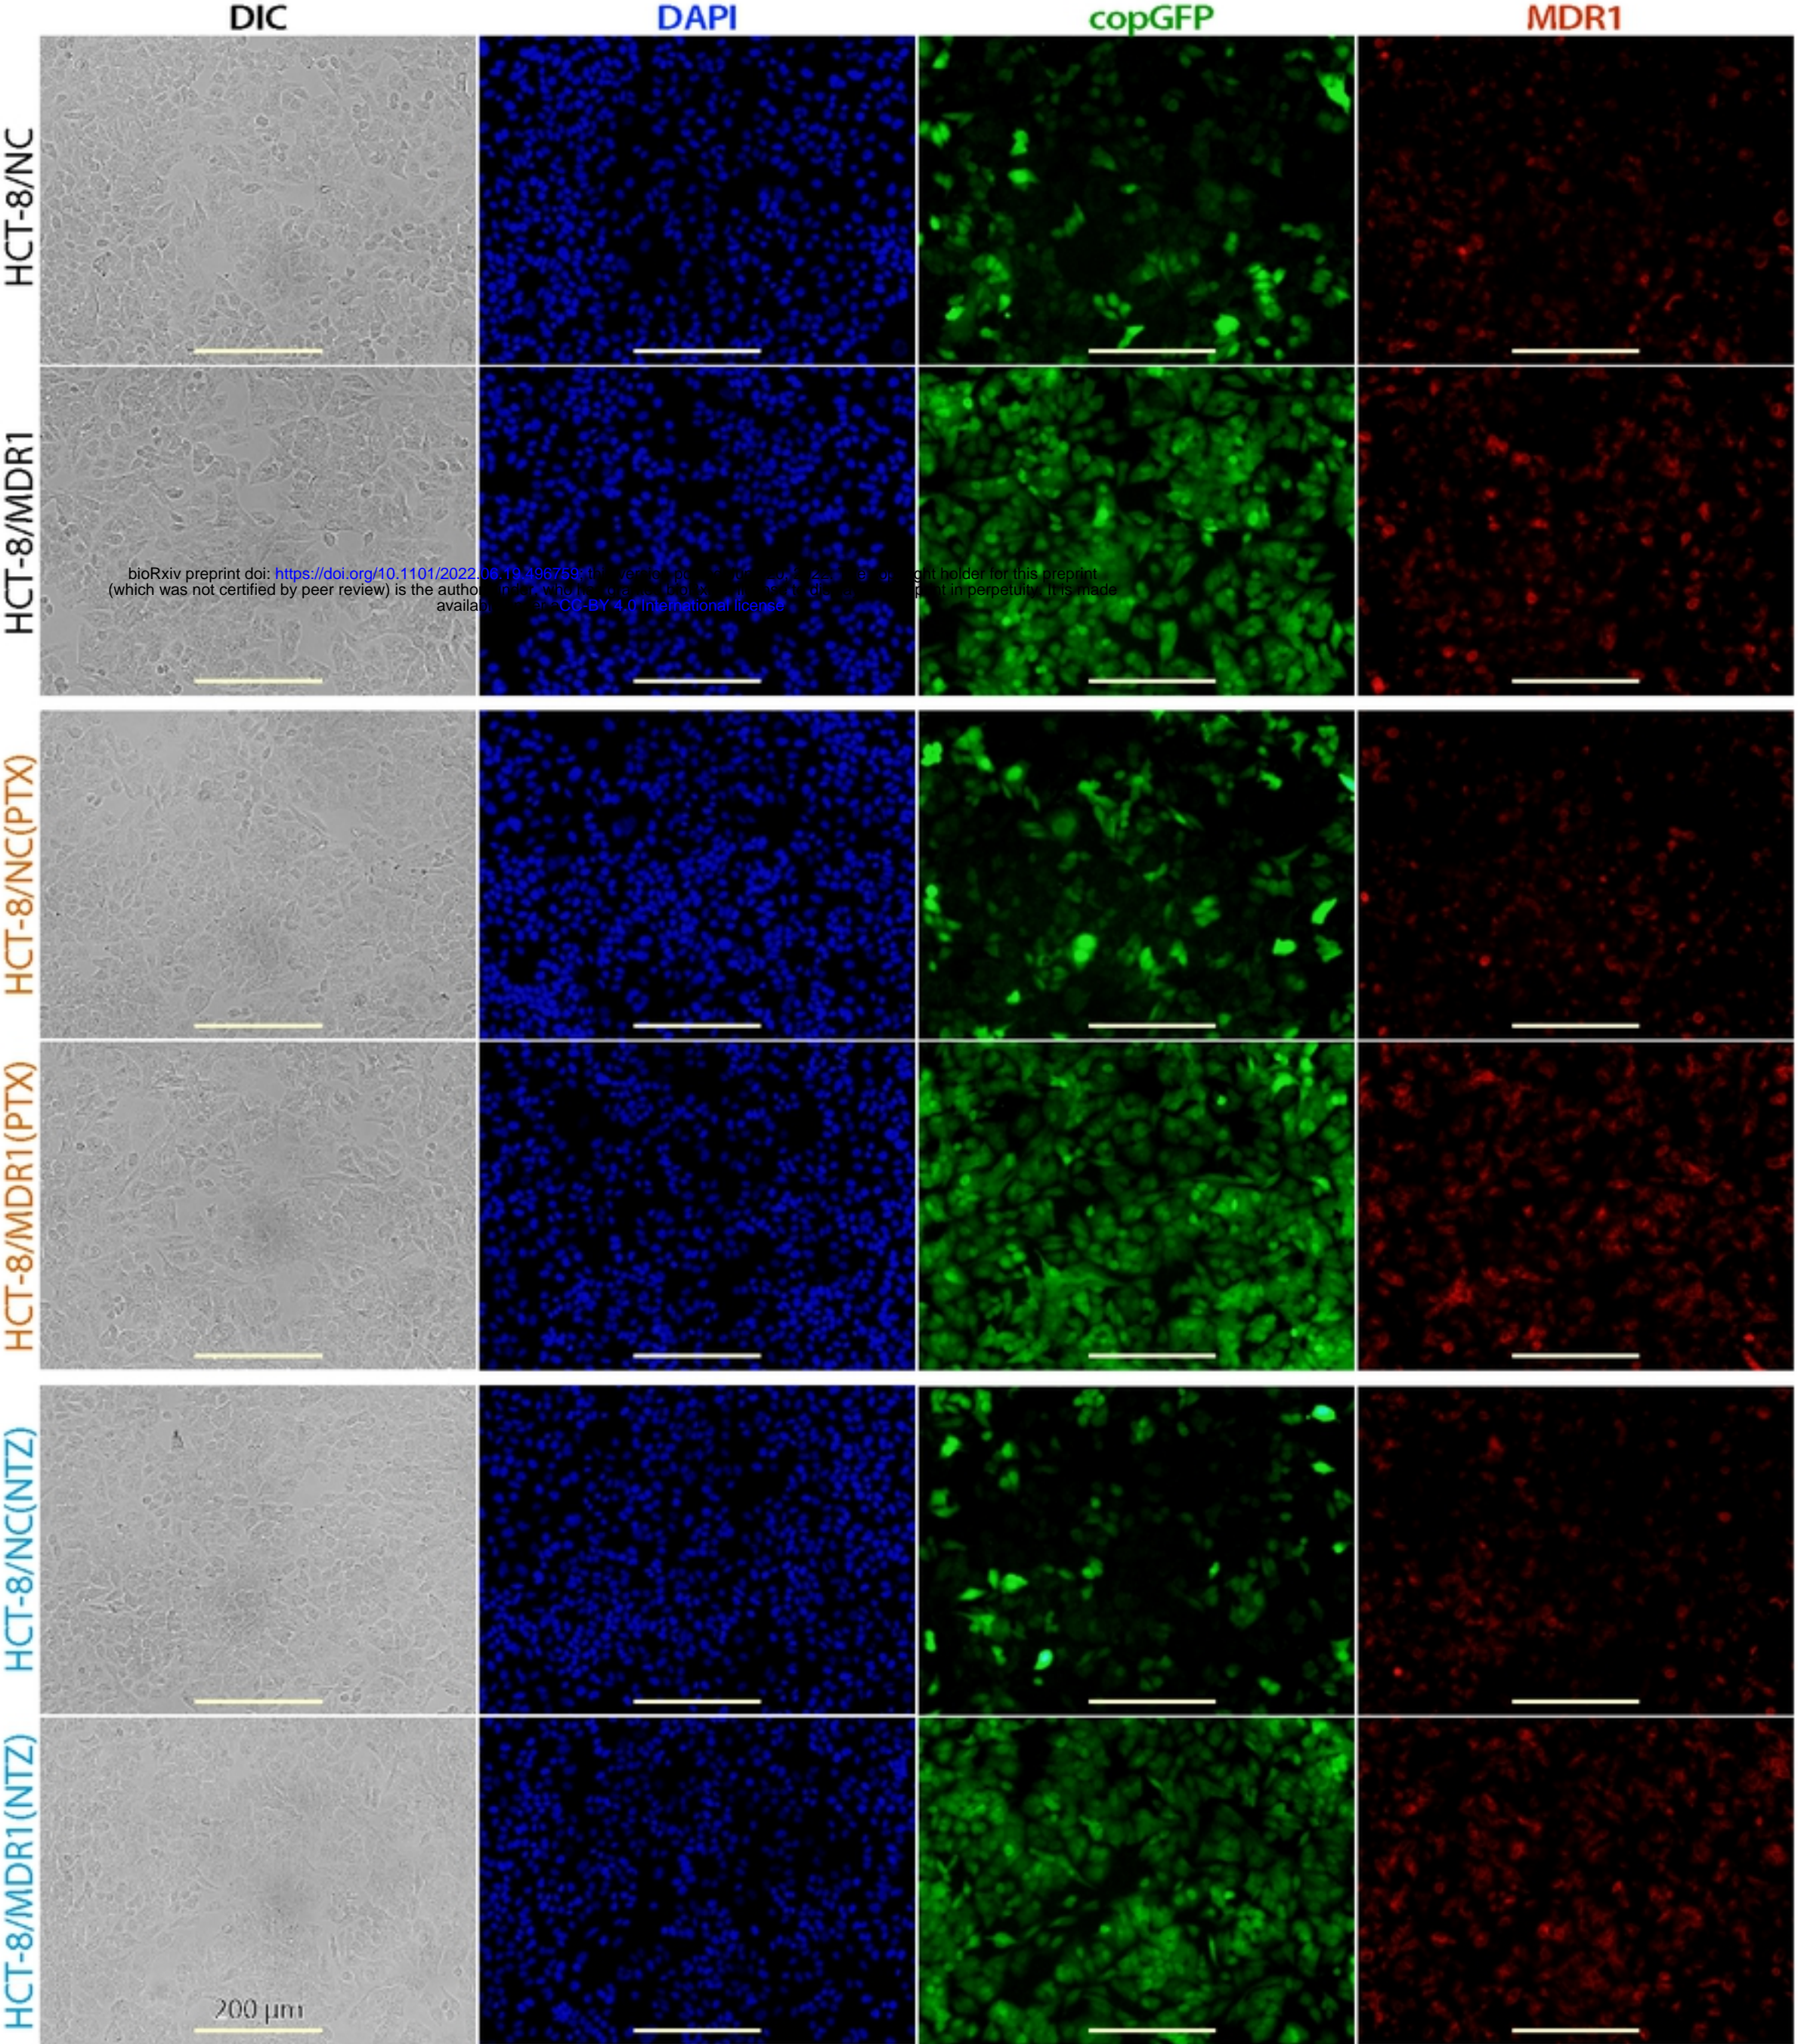

Figure 4



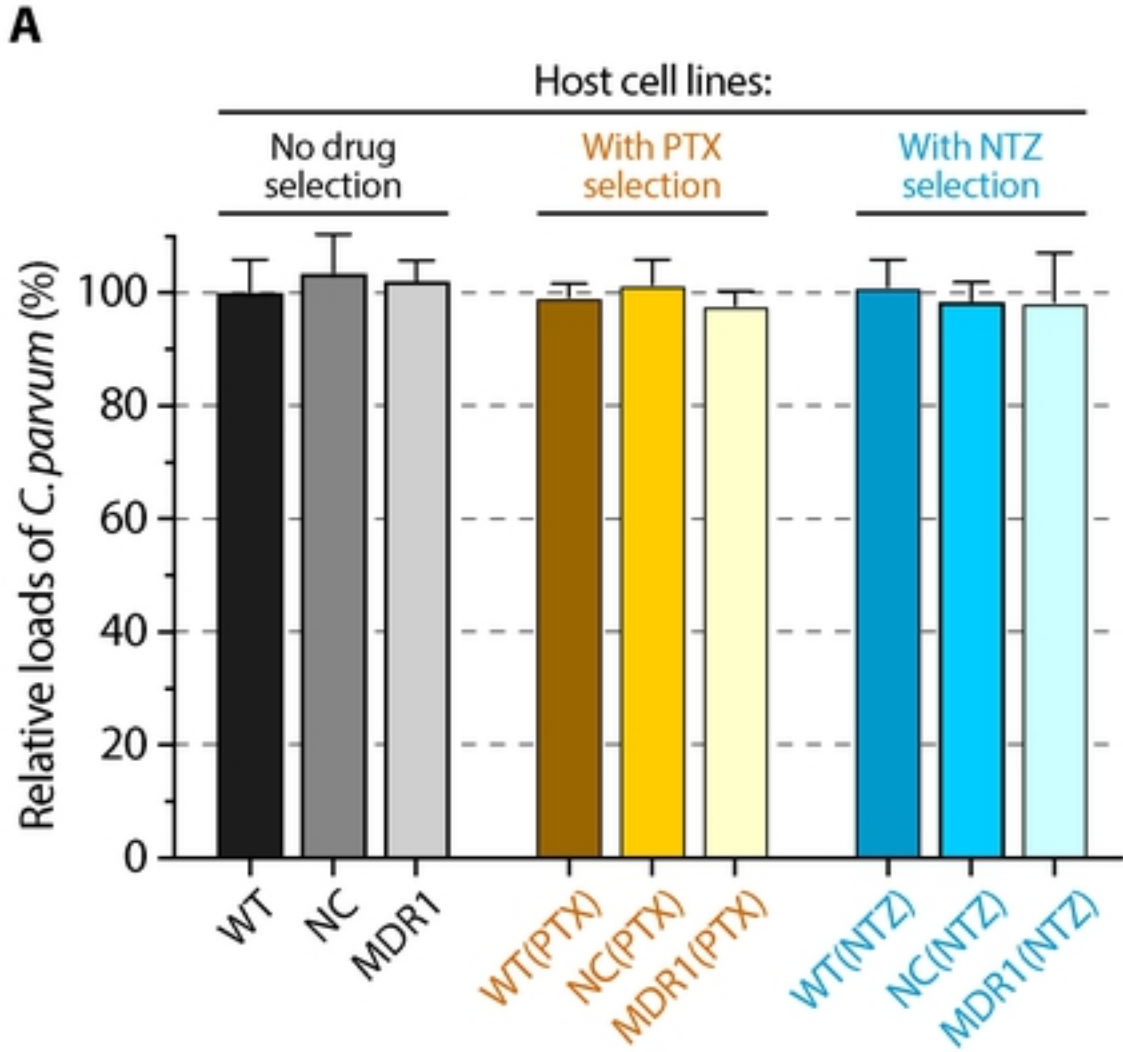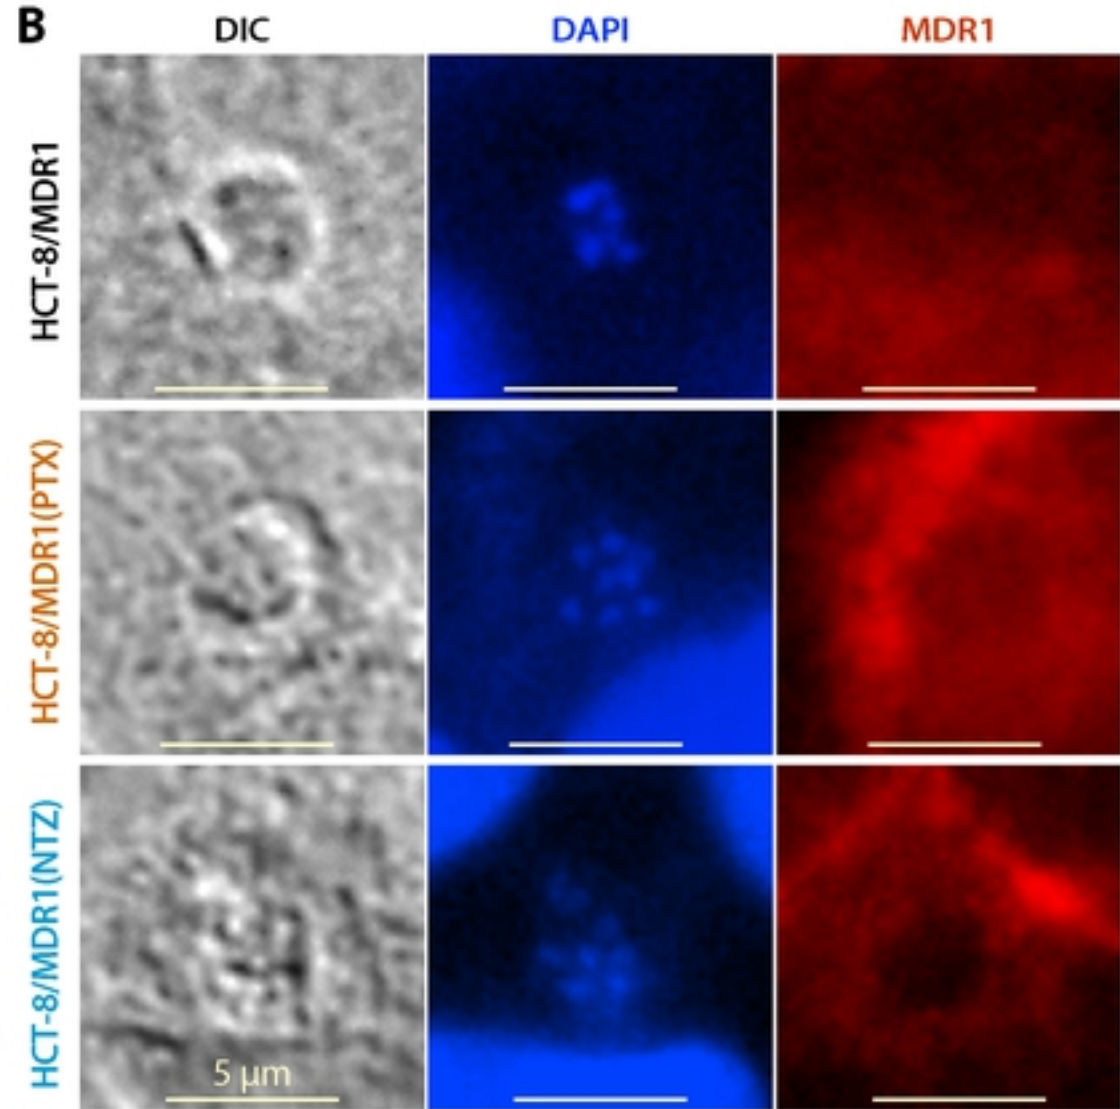

Figure 5

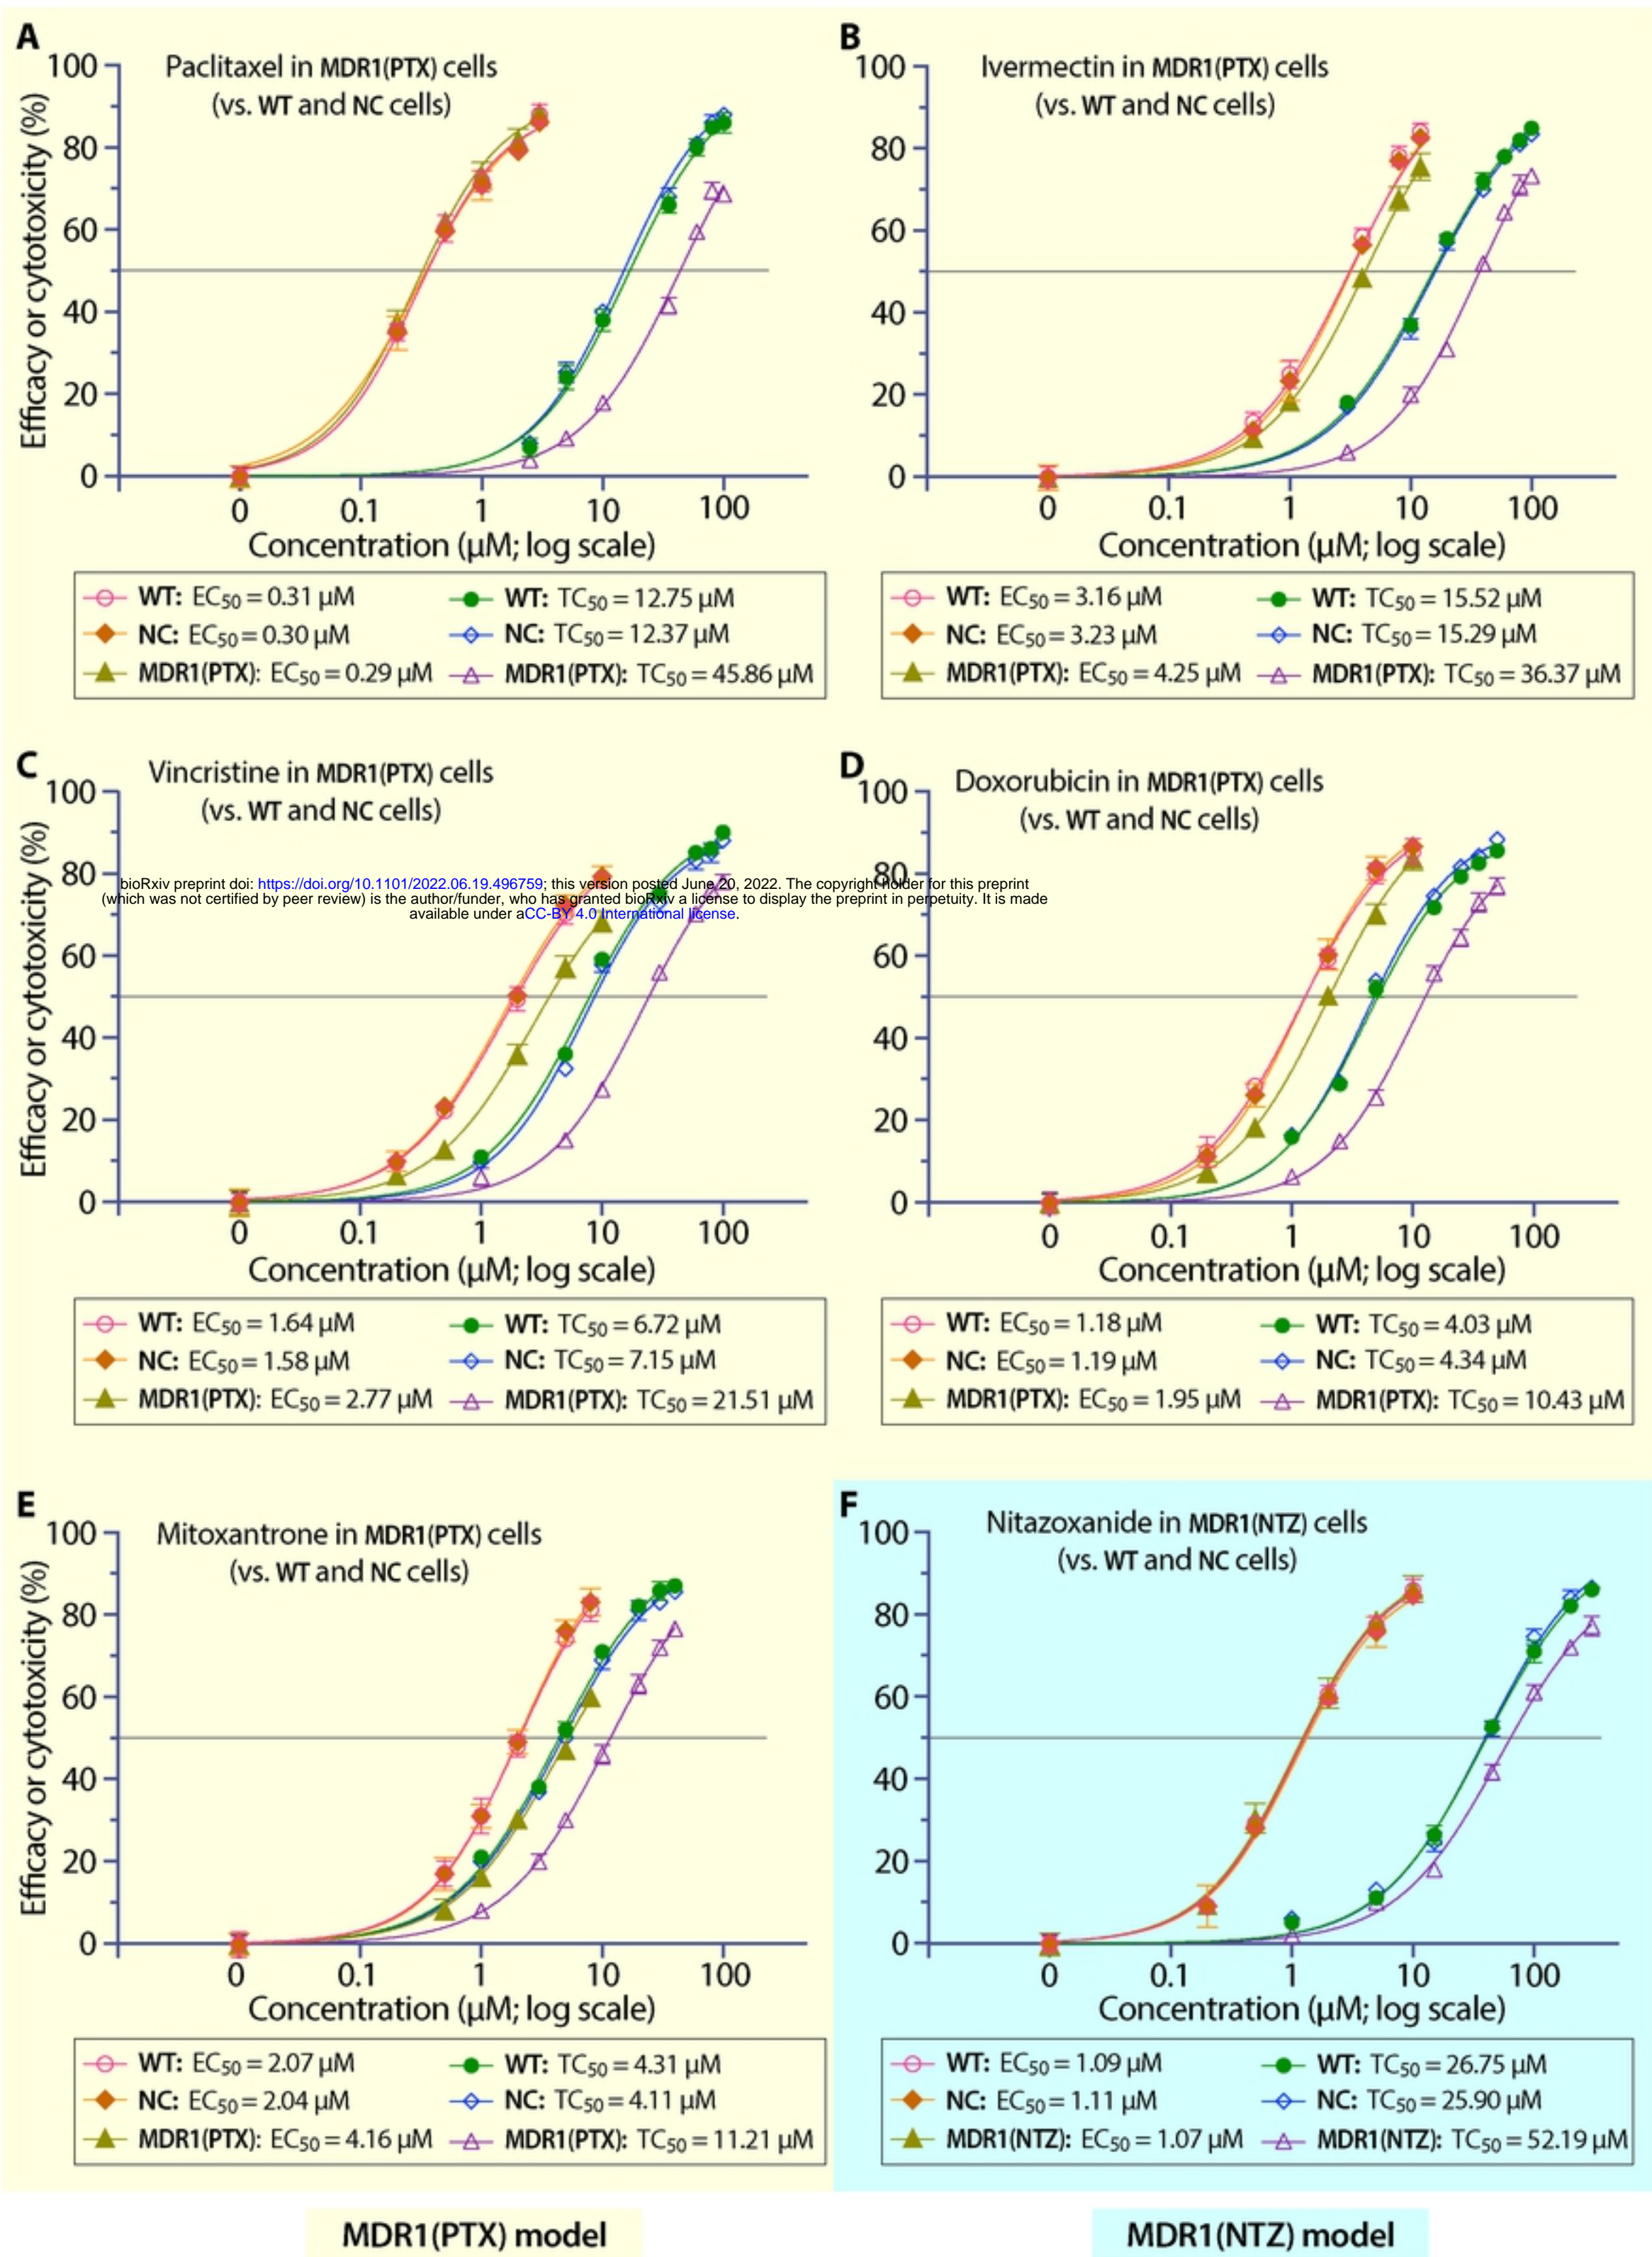

Figure 6



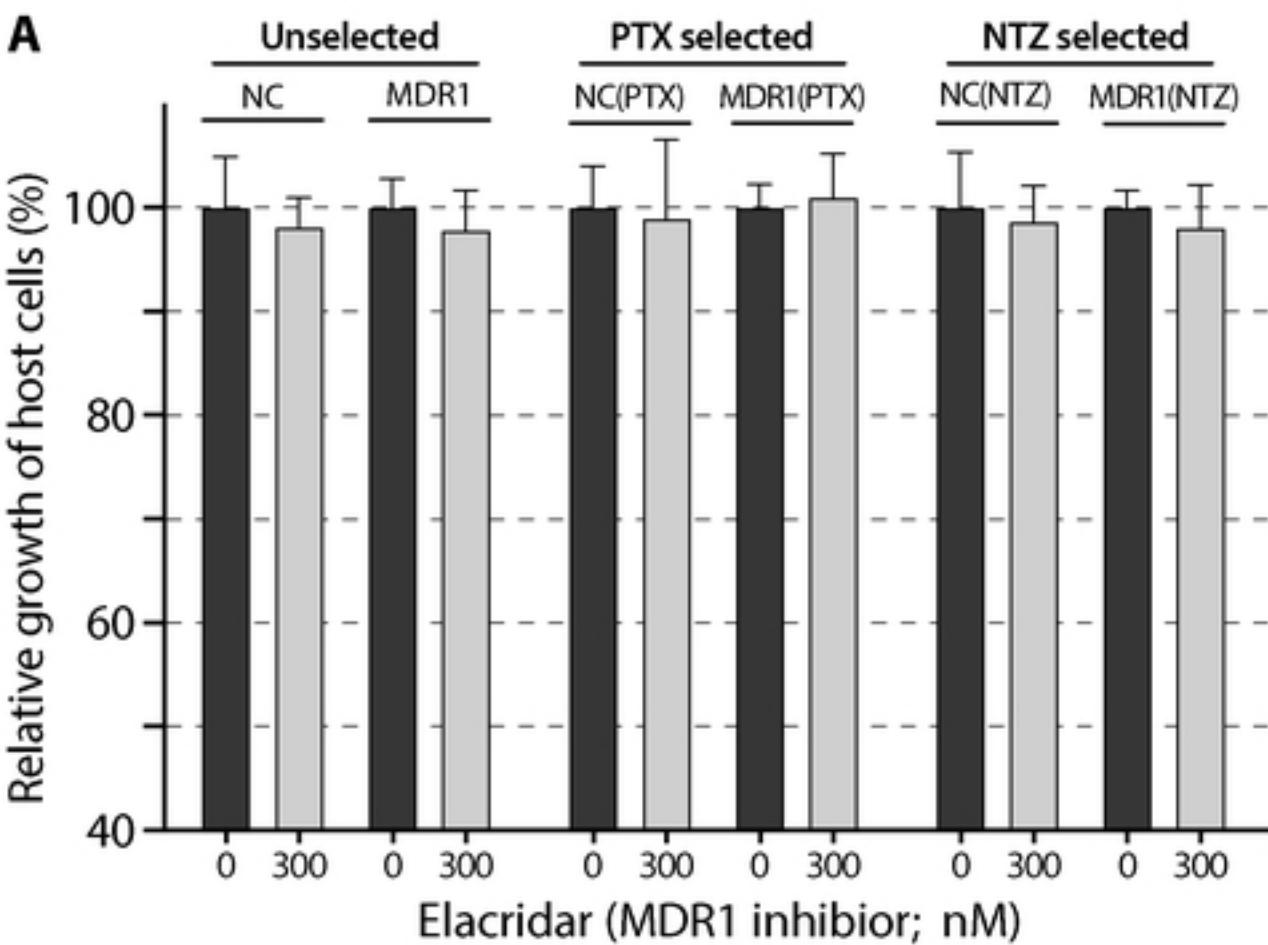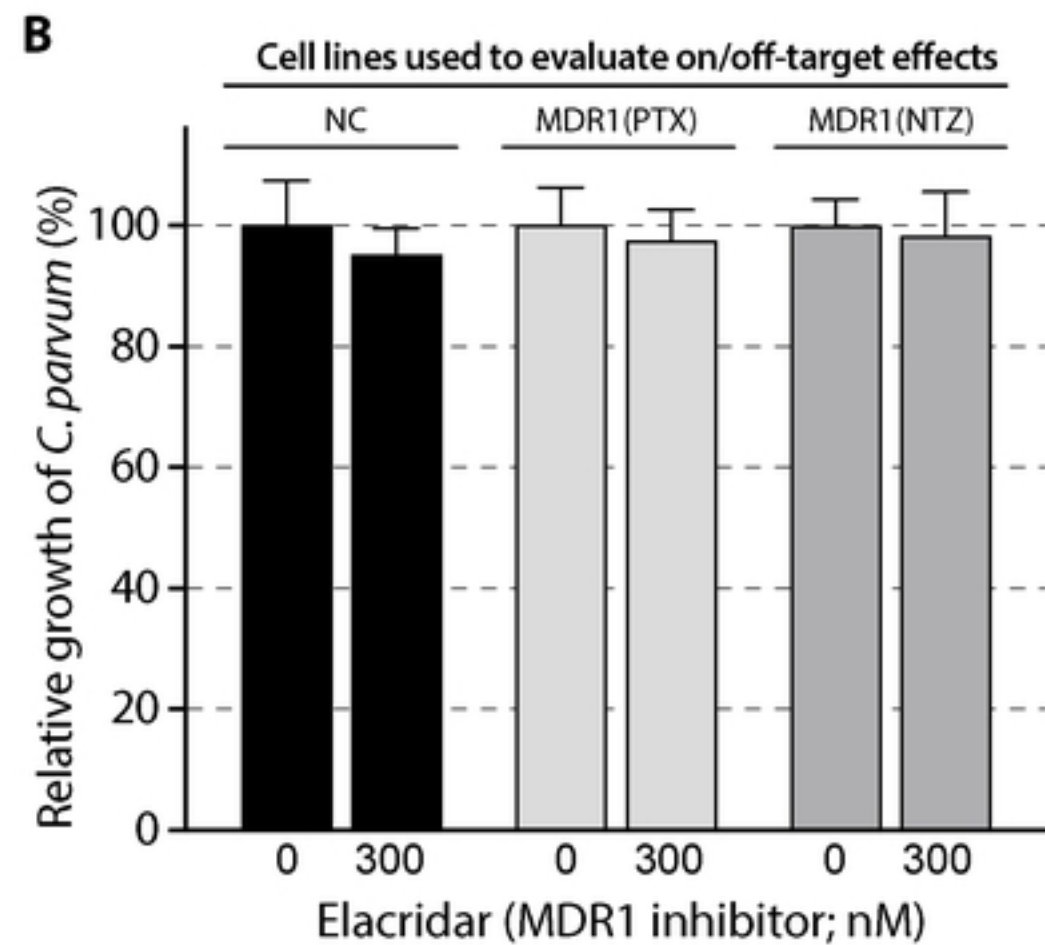

Figure 7

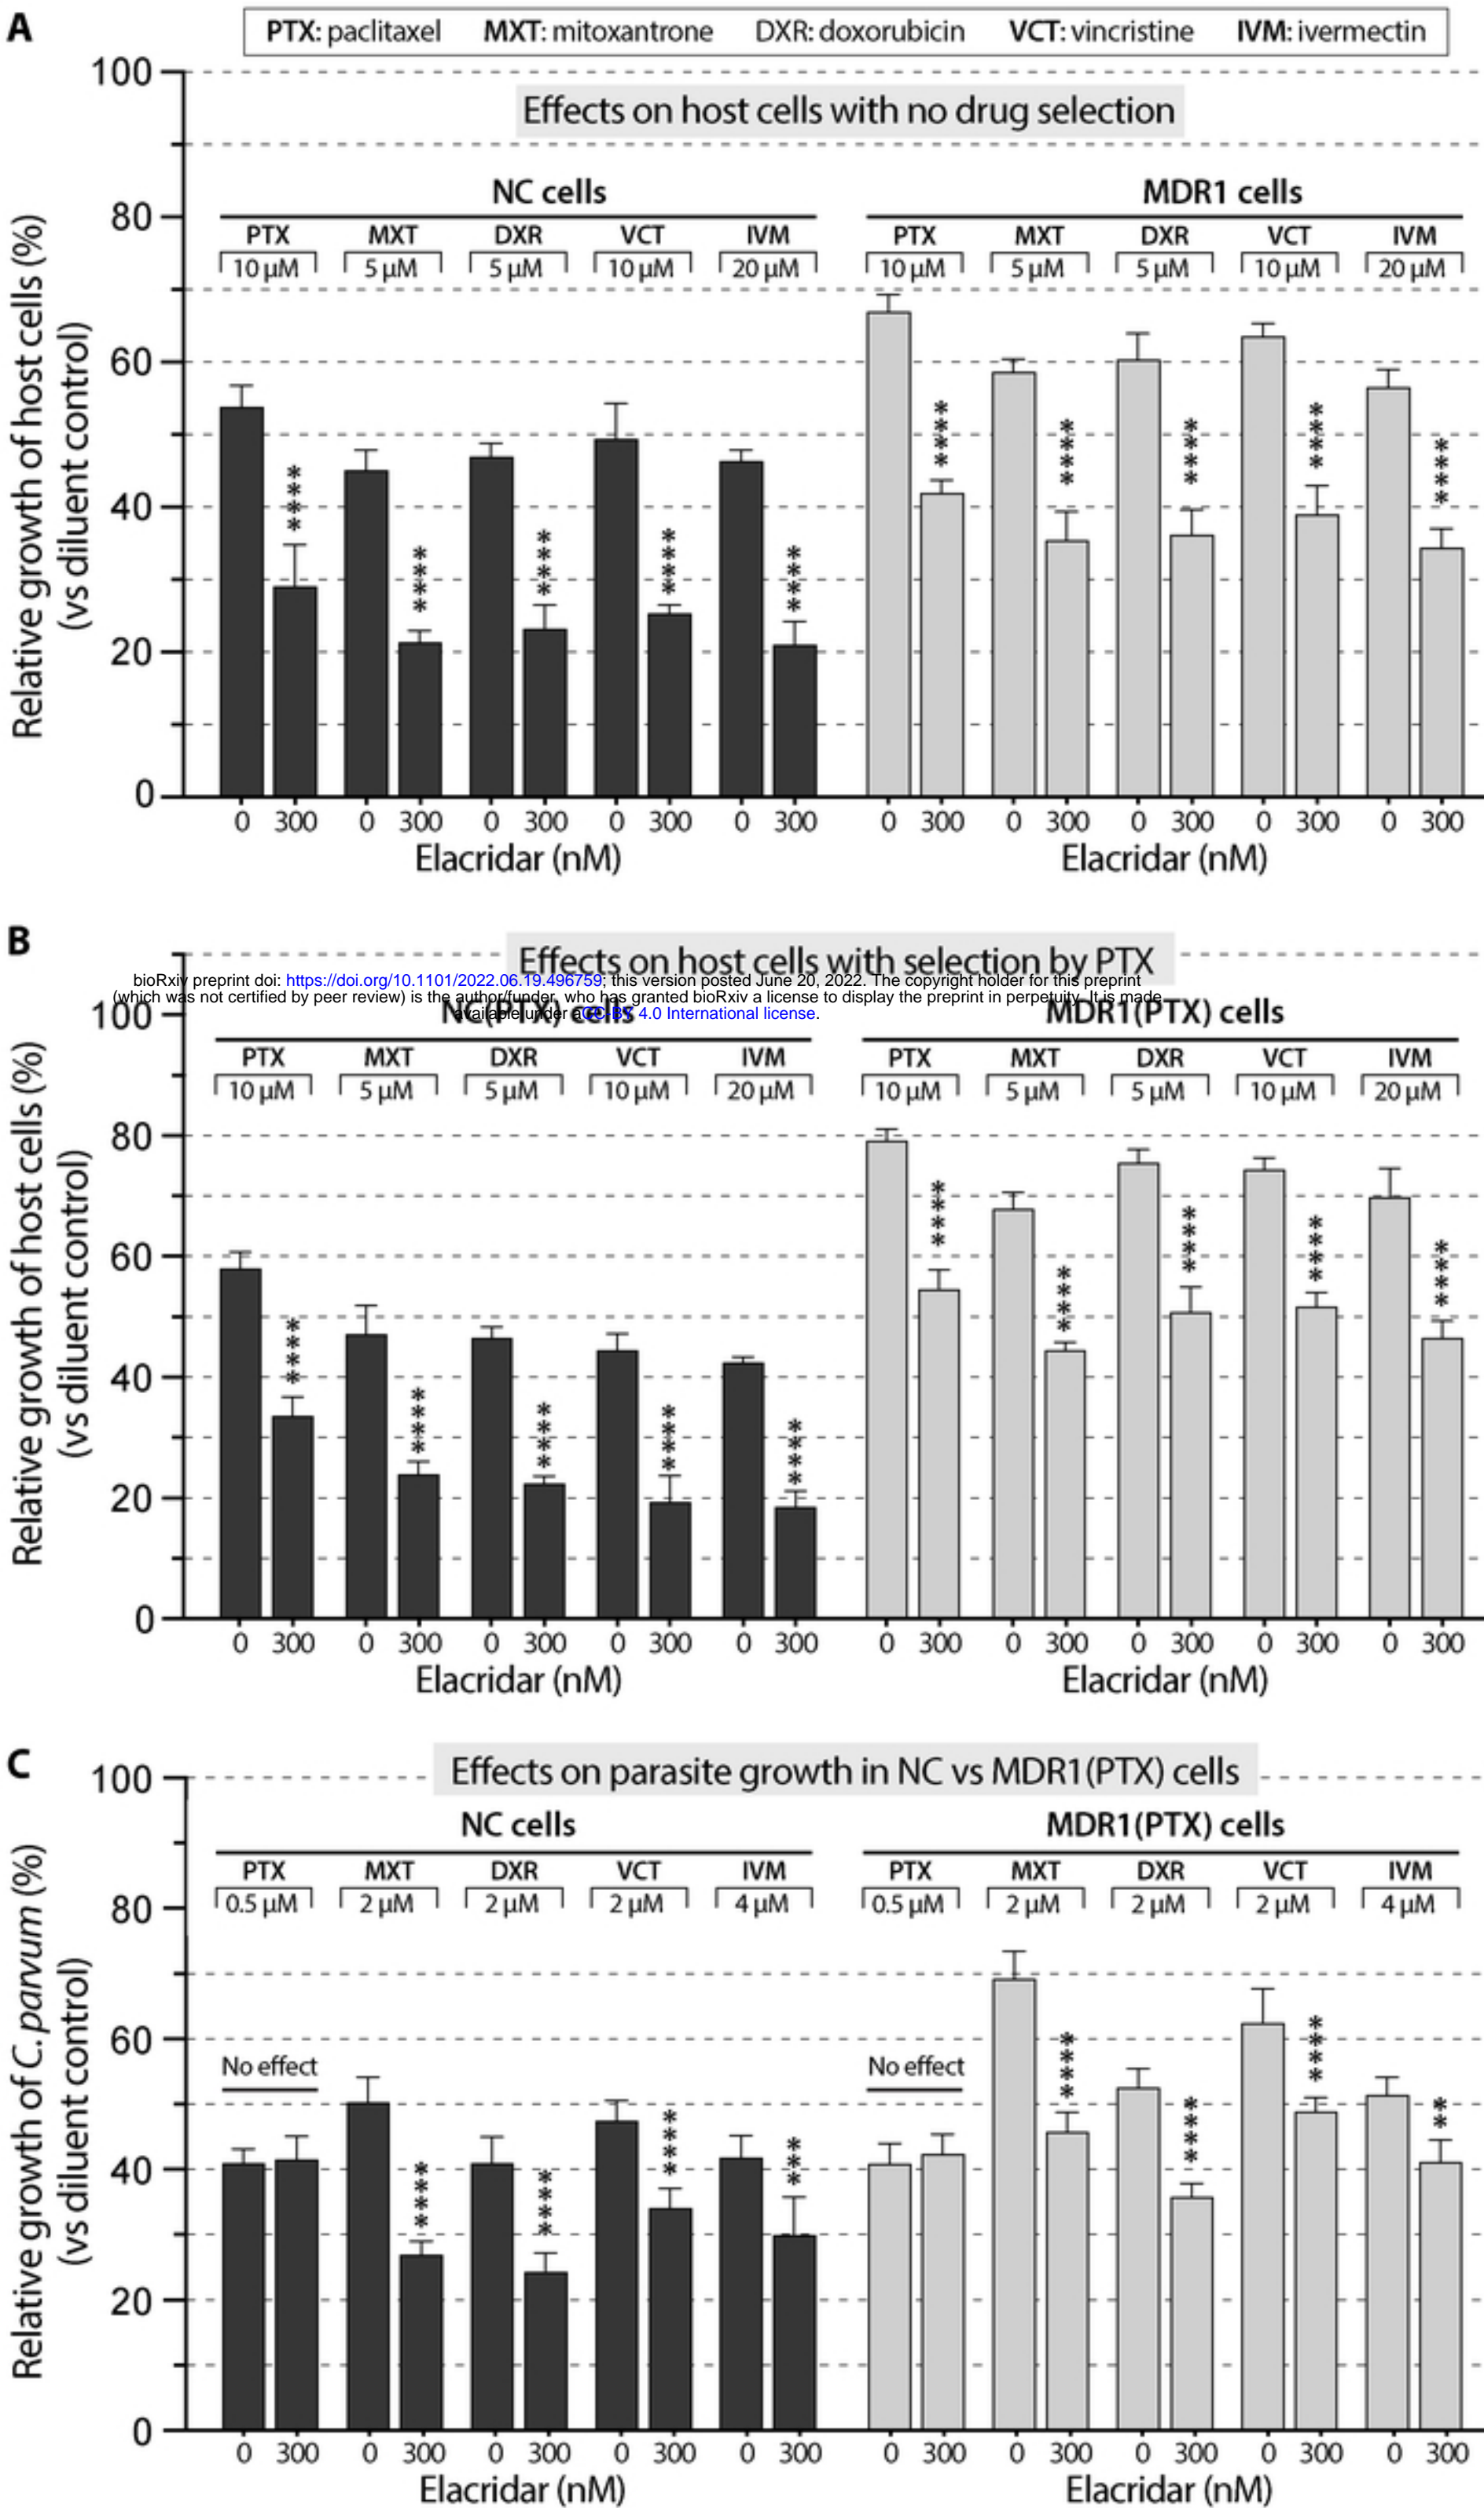

Figure 8



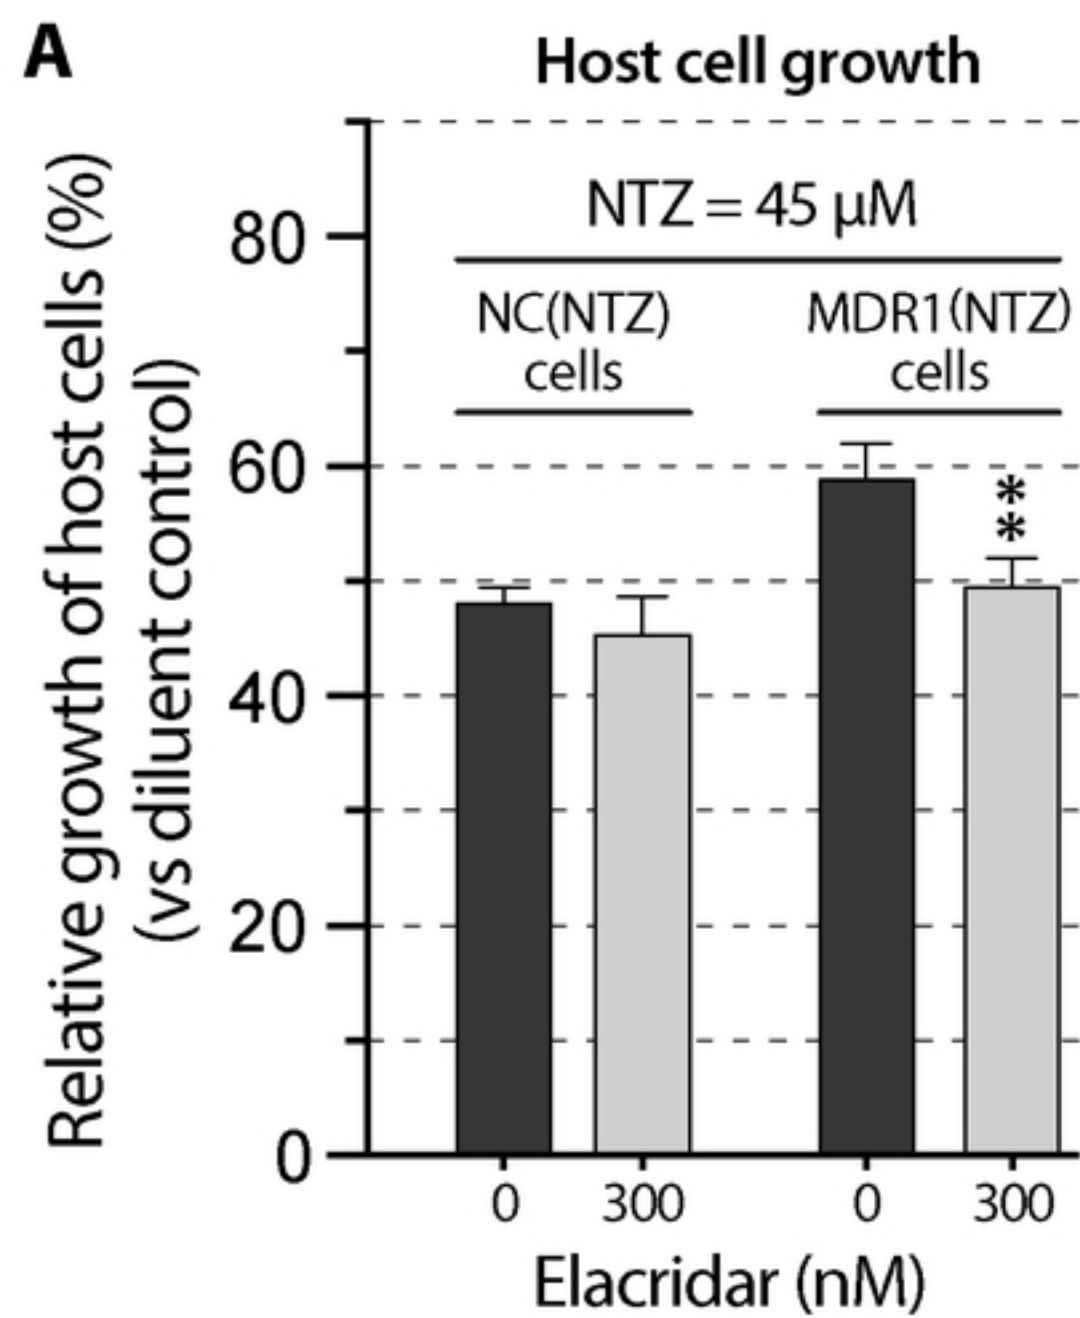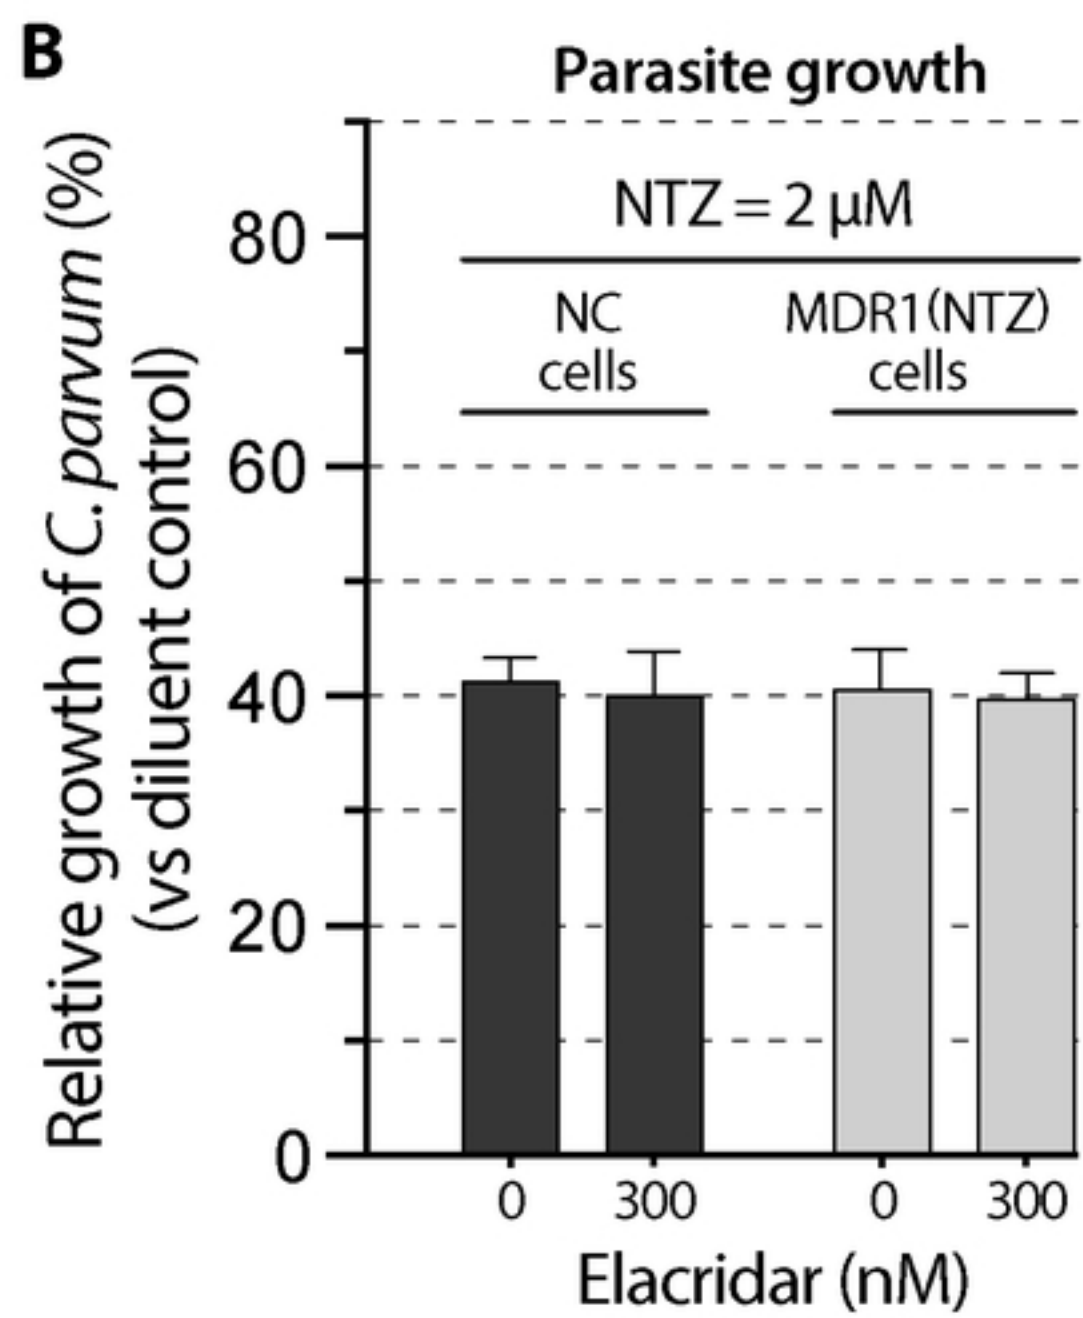

Figure 9

Paclitaxel (PTX)

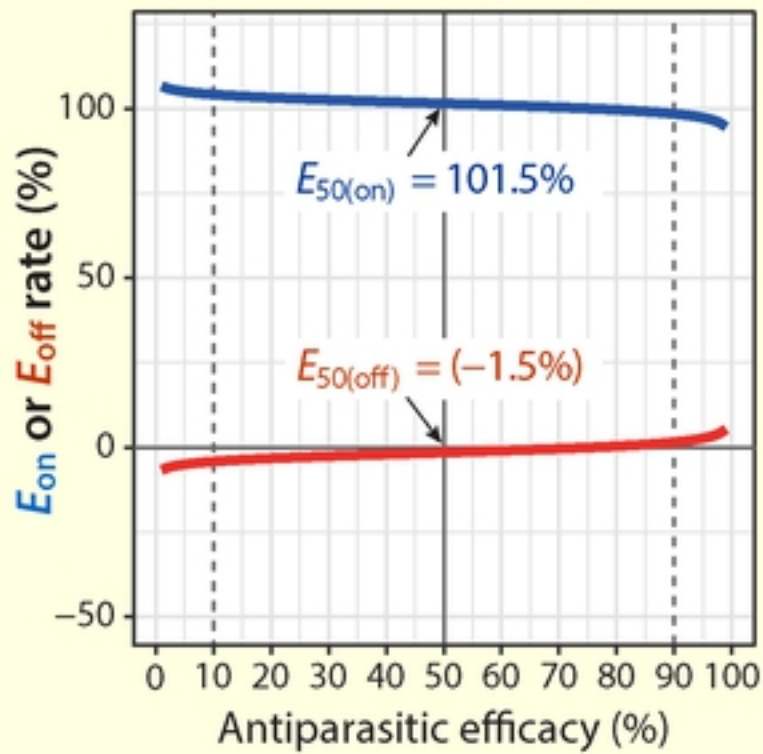

Ivermectin (IVM)

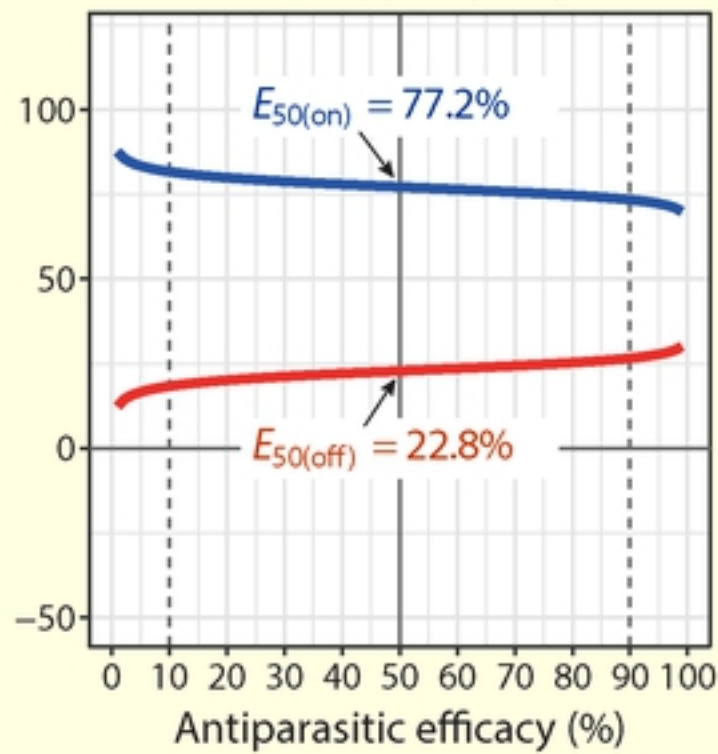

Vincristine (VCT)

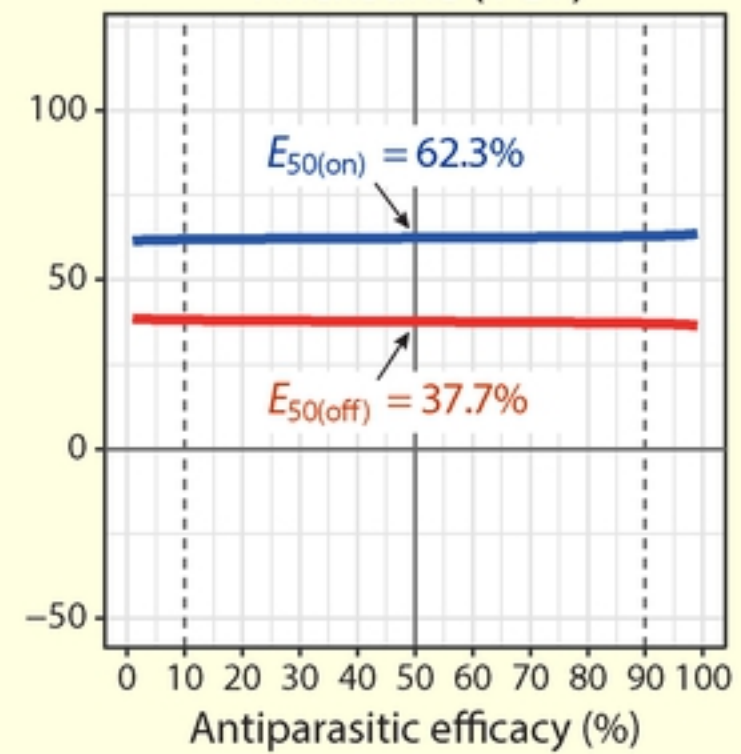

Doxorubicin (DXR)

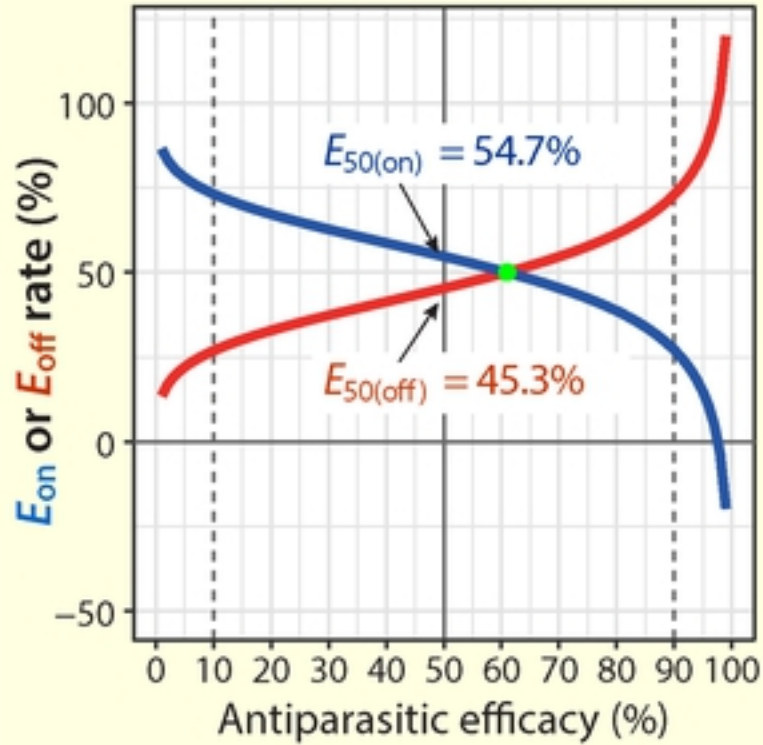

Mitoxantrone (MXT)

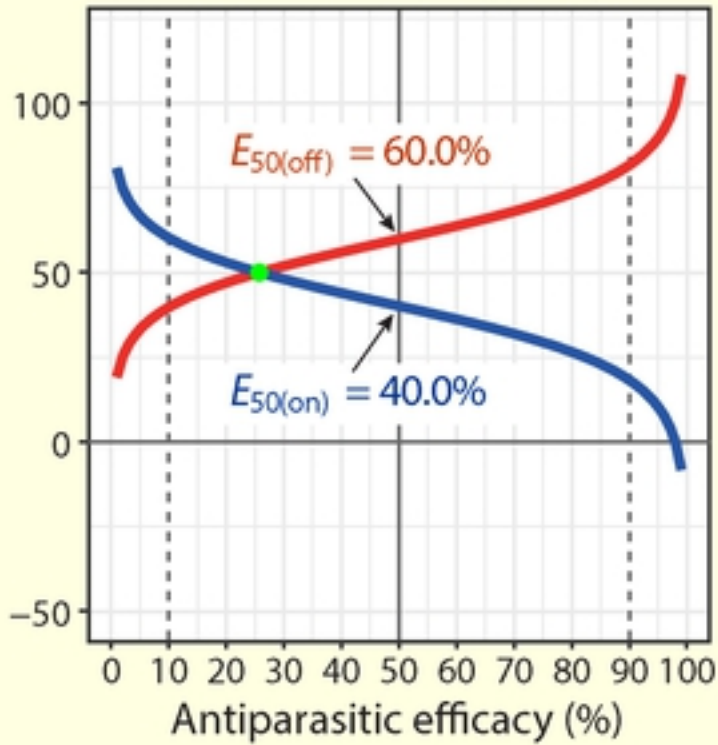

Nitazoxanide (NTZ)

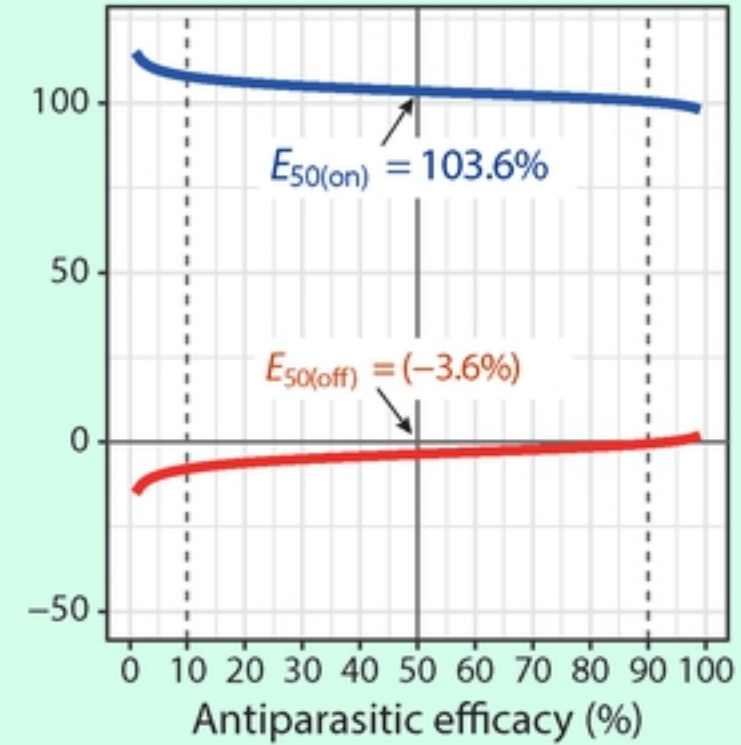

MDR1(PTX) model

MDR1(NTZ) model

Figure 10

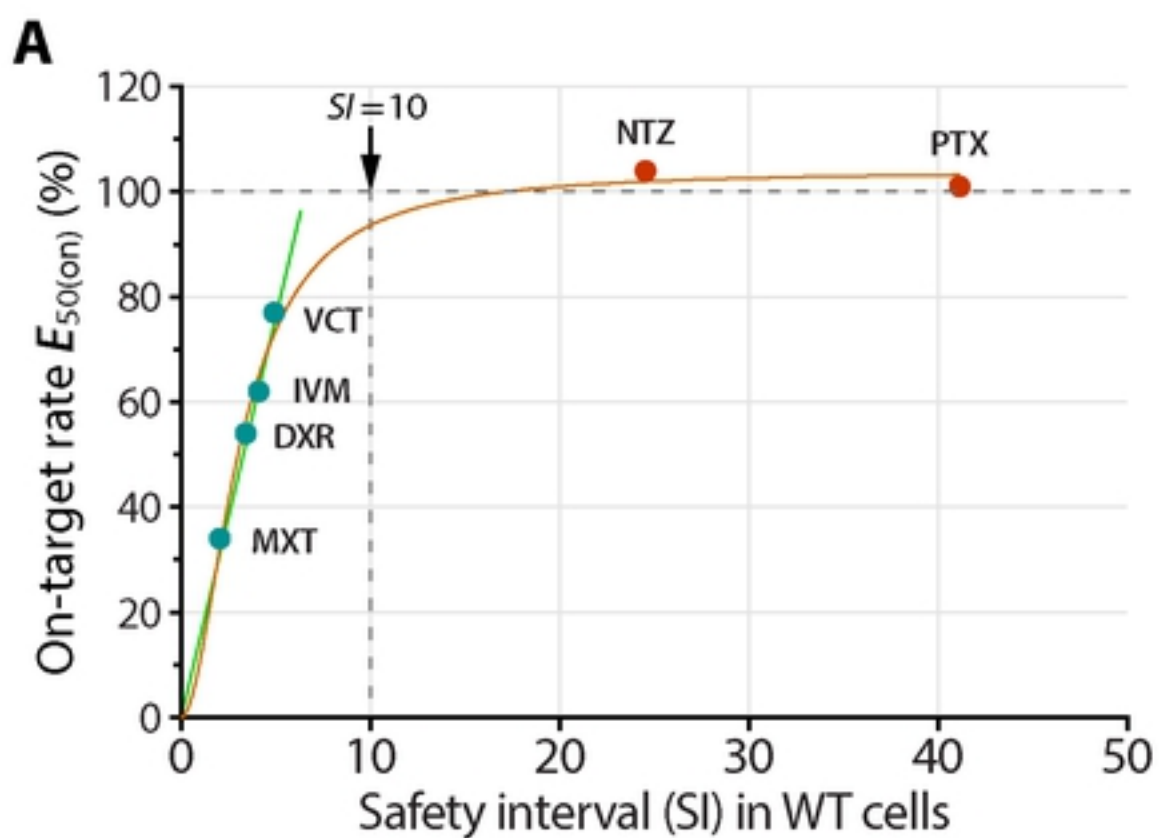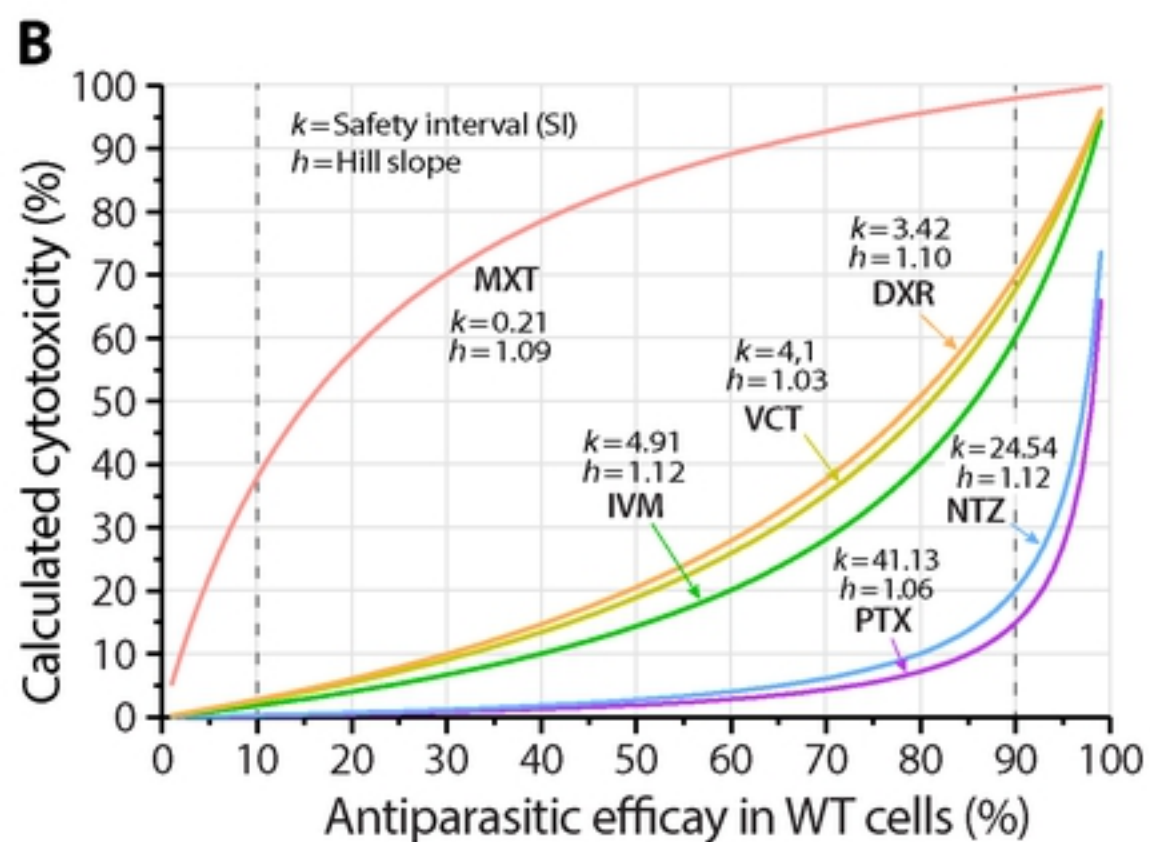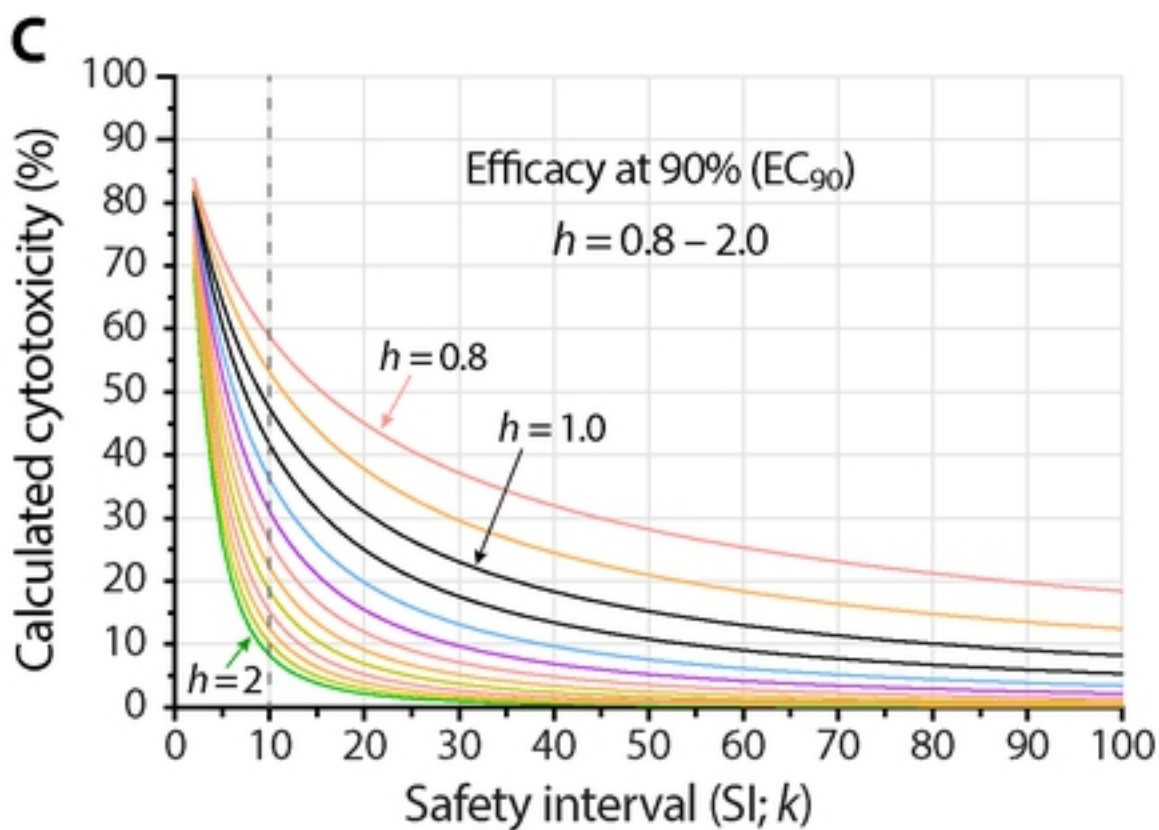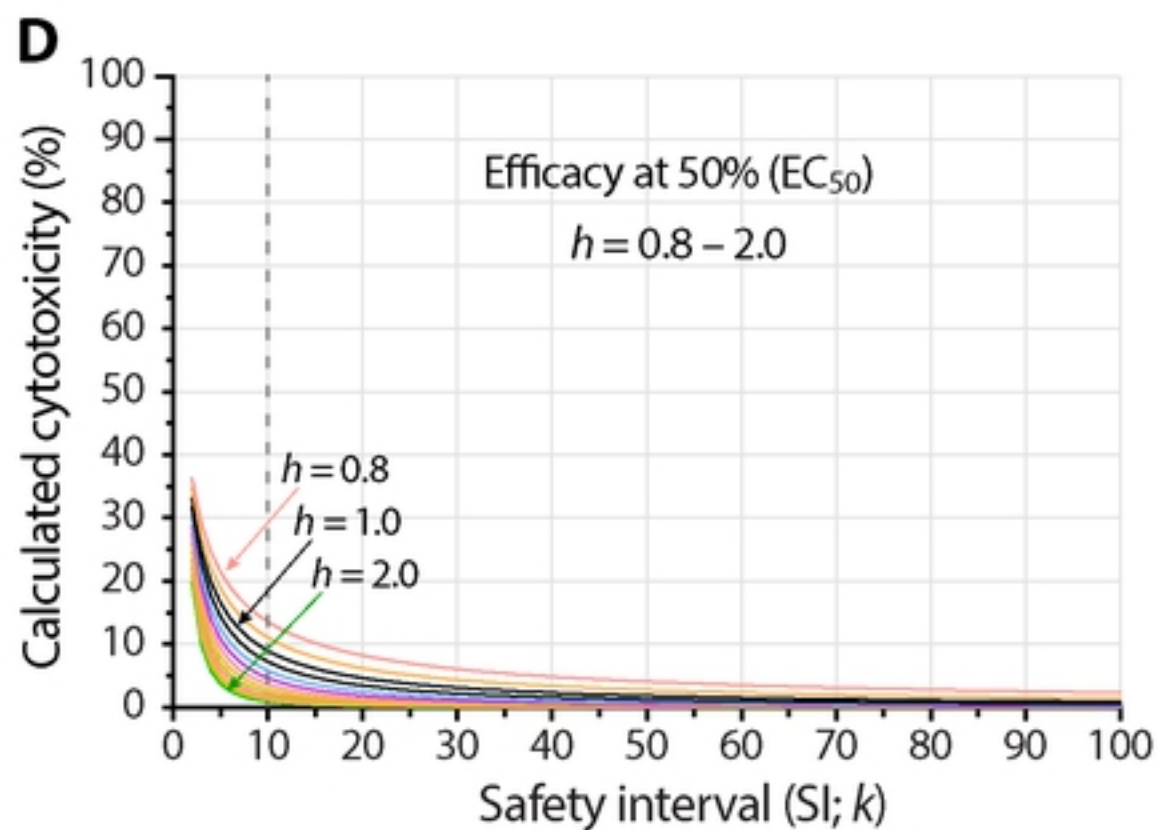

Figure 11
